# Supplementary material for: Fasting-Mimicking Diet Is Safe and Reshapes Metabolism and Antitumor Immunity in Patients with Cancer
Source: Oxford University Press journal article supplement (doi:10.1158/2159-8290.cd-21-0030), 2021-11-17
Supplement: cd-21-0030_supplementarytables_s7-s16_suppst7-st16.xlsx [file cd-21-0030_supplementarytables_s7-s16_suppst7-st16.xlsx]

## Sheet: S7
	stromal_CD8_%area	stromal_CD8_absolute_count	intraepithelial_CD8_absolute_count	CD68	Perforin 1	Granzyme B	IGF1R	p-IGF1R
P1_pre	5	11	2	56	0.5	0	160	10
P2_pre	5	8	0	52	0.3	0.8	230	40
P3_pre	1	3	0	42	0.285714	0	210	10
P4_pre	3	19	1	69	1.7	0.3	115	110
P5_pre	2	14	1	33	0.266667	0	60	120
P6_pre	1	6	0
P7_pre	1	1	0	35	0.285714	0	260	40
P8_pre	3	15	6
P9_pre	4	7	1	17	0.2	0.2	110	5
P10_pre	15	40	3	50	1.21429	1.42857	270	200
P11_pre	1	8	0	30		0	160	70
P12_pre	2	6	0	26	0.4	0	190	80
P13_pre	1	6	0	23	0.1	0	180	150
P14_pre	3	7	0		0.1		280	140
P15_pre	15	30	3	35	0.1	0.3	230	150
P16_pre	0	1	0	18	0.2	0.4	170	260
P17_pre	5	28	2
P18_pre	25	64	3
P19_pre	1	8	0	25	0.181818	0	170	200
P20_pre	10	42	2	62	0.470588	1.76471	200	220
P21_pre	6	12	1	10	0	0.5	270	110
P22_pre	2	11	1	20	0.142857		200	90
P1_post	6	15	2	49	0.4	1.8	140	0
P2_post	10	20	2	69	4.7	7.2	200	10
P4_post	12	42	3	75	5.2	2.7	60	0
P5_post	5	26	2	58	0.6	0.9	120	0
P6_post	2	14	1
P7_post	6	18	2	41	0.3	1	210	10
P8_post	5	20	1	26
P9_post	5	14	1	22	0.6	0.4	85	10
P10_post	20	51	5	70	5.5	3.3	180	120
P11_post	7	25	3	47	0.6	1.2	140	5
P12_post	1	8	0	32	0.25	1.6	100	50
P13_post	2	13	1	42	0.1	0.8	80	40
P14_post	6	13	2	32	0.4	1.4	270	115
P15_post	15	36	3	52	1.7	1.3	230	50
P16_post	1	4	0	17	1.5	2.6	130	170
P17_post	5	25	3	21	0.3
P18_post	25	63	5	55
P19_post	1	8	0	32	0.2	0.5	170	85
P20_post	10	38	5	48	1.9	4.2	190	0
P21_post	7	18	1		0.7	1.5	250	190
P22_post	2	18	1	20	0.2		150	125

## Sheet: S8
	P1_Pre	P2_Pre	P3_Pre	P4_Pre	P5_Pre	P6_Pre	P7_Pre	P8_Pre	P9_Pre	P10_Pre	P11_Pre	P1_Post	P2_Post	P3_Post	P4_Post	P5_Post	P6_Post	P7_Post	P8_Post	P9_Post	P10_Post	P11_Post	P12_Pre	P13_Pre	P14_Pre	P15_Pre	P16_Pre	P17_Pre	P18_Pre	P19_Pre	P20_Pre	P21_Pre	P22_Pre	P12_Post	P13_Post	P14_Post	P15_Post	P16_Post	P17_Post	P18_Post	P19_Post	P20_Post	P21_Post	P22_Post
B-cells	-0.0324136	-0.0102192	-0.285746	-0.126917	-0.146065	0.0723705	-0.120583	-0.0187167	-0.0489188	0.0665292	-0.0782129	-0.056134	0.179903	-0.0453361	0.0611395	-0.135877	-0.108273	-0.064733	0.0847762	0.0192442	0.189746	-0.127426	0.0324834	-0.117759	-0.273511	-0.0449063	-0.0394167	-0.0670291	0.292597	-0.0720223	0.0880725	0.0379654	0.034494	0.126113	-0.171732	-0.1295	-0.14129	-0.0509219	0.0704297	0.267966	-0.0478924	0.0618753	0.120096	0.048645
CD4+ T-cells	0.346989	0.200448	0.277155	0.376252	0.27924	0.188797	0.219333	0.312568	0.268876	0.270088	0.355482	0.208895	0.215907	0.34358	0.319765	0.208108	0.0559006	0.318923	0.200893	0.211828	0.311643	0.303404	0.126429	0.098498	0.14177	0.177075	0.325069	0.248528	0.367536	0.199301	0.437101	0.168758	0.274793	0.237689	0.273784	0.269821	0.401776	0.369115	0.396517	0.47973	0.285722	0.446009	0.431594	0.269539
CD4+ Tcm	0.633092	0.589552	0.608277	0.604317	0.637115	0.593281	0.603476	0.583292	0.600849	0.57953	0.602965	0.70537	0.67307	0.669739	0.674306	0.68093	0.627529	0.636565	0.62427	0.686381	0.62087	0.605079	0.573775	0.634096	0.559418	0.64747	0.641907	0.625489	0.659344	0.640484	0.622787	0.632894	0.610431	0.629834	0.647862	0.609113	0.655299	0.681452	0.650026	0.638972	0.631984	0.619321	0.675963	0.548352
CD4+ Tem	0.370424	0.376567	0.331791	0.370269	0.356473	0.387315	0.443205	0.370544	0.429941	0.34341	0.384389	0.349318	0.393838	0.362783	0.341307	0.385758	0.276862	0.455166	0.376304	0.446577	0.414138	0.315397	0.431838	0.227843	0.364665	0.287165	0.327045	0.379177	0.397133	0.366962	0.390473	0.38847	0.377276	0.404711	0.365364	0.41947	0.349262	0.367068	0.442801	0.445309	0.413802	0.42507	0.484043	0.394525
CD8+ T-cells	0.212767	0.110937	0.0536455	0.194452	0.0911377	0.0825938	0.0363124	0.166524	0.151697	0.226131	0.168776	0.143118	0.189618	0.222442	0.286442	0.146572	0.0755476	0.129597	0.189119	0.282288	0.348117	0.149864	0.0805581	0.0566076	0.0951751	0.122851	0.107402	0.119832	0.376151	0.0777774	0.252741	0.155378	0.182768	0.150211	0.123556	0.146891	0.273453	0.104559	0.216215	0.363541	0.0635652	0.233891	0.296652	0.00590791
CD8+ Tcm	0.557567	0.536353	0.524446	0.609648	0.507162	0.525549	0.588986	0.501201	0.573932	0.514067	0.51293	0.595309	0.597669	0.594115	0.573206	0.525285	0.496618	0.6309	0.550724	0.618062	0.578841	0.531071	0.502573	0.512379	0.484253	0.575675	0.553998	0.524726	0.566551	0.522373	0.553056	0.513968	0.55342	0.547701	0.573176	0.566189	0.553037	0.591432	0.594306	0.575609	0.531218	0.595837	0.539459	0.552413
CD8+ Tem	0.585468	0.530161	0.509745	0.57316	0.476438	0.596482	0.556446	0.522651	0.521474	0.582495	0.540924	0.561028	0.615249	0.606297	0.634872	0.523881	0.482602	0.600994	0.58252	0.673567	0.656129	0.542675	0.512276	0.529626	0.436087	0.542046	0.540941	0.522695	0.694136	0.543079	0.564615	0.537478	0.603797	0.580762	0.517183	0.498011	0.612467	0.564681	0.601345	0.646489	0.559411	0.550123	0.60476	0.530002
Eosinophils	0.356995	0.339529	0.255176	0.341855	0.162576	0.289122	0.322661	0.299972	0.326203	0.260058	0.366508	0.26421	0.326709	0.292336	0.265477	0.277525	0.285922	0.373913	0.276497	0.321009	0.477346	0.363987	0.275474	0.179853	0.290542	0.231648	0.186315	0.152152	0.398868	0.336429	0.296088	0.200455	0.311449	0.370651	0.329265	0.43807	0.353213	0.324617	0.401572	0.516848	0.446068	0.417603	0.445402	0.474082
Macrophages	0.0879006	0.00554466	-0.0216233	0.0732127	-0.00487144	0.0597719	0.0662449	0.0178013	0.0349453	0.0144214	0.0450747	0.0113763	0.0995682	0.0992377	0.0697829	-6.93e-05	-0.0304075	0.137183	0.0757919	0.142737	0.123276	-0.0152294	0.0414682	0.0551236	-0.024876	0.000560253	0.0821172	0.0147615	0.130503	0.0345064	0.0548219	0.0235519	0.0301743	0.100778	0.0279488	0.0701434	-0.0209401	0.107808	0.0355262	0.128568	0.0742909	0.0885366	0.0867855	0.0703408
Mast cells	0.14758	0.0819808	0.0382506	0.187727	0.0677717	0.128328	0.238652	0.166809	0.209975	0.0579229	0.117899	0.159735	0.171678	0.0899539	0.19866	0.103672	0.14591	0.279517	0.169562	0.388195	0.205927	0.134028	0.126502	-0.0588613	0.0662783	0.0458069	0.0868916	0.144497	0.176255	0.179248	0.112011	0.180442	0.129193	0.218107	0.151421	0.146443	0.156171	0.165416	0.274172	0.134862	0.238432	0.163924	0.177936	0.200876
Memory B-cells	0.38319	0.25562	0.258541	0.369877	0.310507	0.242471	0.285801	0.287302	0.207665	0.113938	0.245585	0.39105	0.185556	0.210997	0.330425	0.215885	0.159896	0.29858	0.270886	0.182791	0.25274	0.215695	0.243789	0.245522	0.170597	0.26956	0.303689	0.179544	0.253962	0.234863	0.285802	0.255358	0.288114	0.24335	0.236023	0.212557	0.406014	0.256639	0.287936	0.295681	0.321908	0.311379	0.272371	0.249491
Monocytes	0.551832	0.502023	0.466422	0.553476	0.511745	0.470477	0.507444	0.473978	0.517454	0.544158	0.507899	0.55711	0.559043	0.531219	0.597656	0.550048	0.50204	0.528621	0.549556	0.612809	0.530839	0.513515	0.479224	0.507877	0.469925	0.491874	0.533139	0.497077	0.573813	0.536273	0.497796	0.528528	0.51371	0.520975	0.527122	0.533599	0.47491	0.536502	0.525442	0.526172	0.517729	0.502328	0.522192	0.516245
NK cells	0.577654	0.511029	0.534567	0.568332	0.520978	0.557636	0.554878	0.540823	0.53599	0.591054	0.578914	0.562698	0.584385	0.582535	0.624201	0.562443	0.508263	0.570804	0.570551	0.623822	0.608824	0.564675	0.506479	0.607817	0.526913	0.562482	0.529	0.558954	0.607446	0.580814	0.579787	0.548403	0.575245	0.554826	0.594405	0.537223	0.58368	0.537892	0.572207	0.585147	0.573077	0.567806	0.585699	0.500732
NKT	0.155758	0.140488	0.140367	0.167424	0.100583	0.145599	0.132753	0.102611	0.123844	0.165672	0.151592	0.165862	0.168768	0.193041	0.203085	0.140523	0.082401	0.172835	0.152766	0.20116	0.166128	0.156125	0.101451	0.125508	0.0986403	0.176653	0.155285	0.127855	0.20096	0.149576	0.14624	0.108238	0.167431	0.130339	0.168776	0.132497	0.132274	0.172375	0.165458	0.190366	0.150398	0.167878	0.17742	0.112511
Neutrophils	-0.252555	-0.197686	-0.224343	-0.29463	-0.158032	-0.219994	-0.17959	-0.176878	-0.102868	-0.166999	-0.16169	-0.198359	-0.204959	-0.232949	-0.170954	-0.226895	-0.234483	-0.162258	-0.173843	-0.0472662	-0.197953	-0.127009	-0.206874	-0.16148	-0.182346	-0.162996	-0.0589499	-0.206774	-0.221554	-0.212376	-0.22487	-0.234794	-0.178354	-0.167042	-0.175829	-0.159268	-0.188543	-0.0926372	-0.151353	-0.13602	-0.116873	-0.135996	-0.167788	-0.0737096
Tgd cells	0.501025	0.410267	0.502886	0.523335	0.48325	0.406256	0.487482	0.45649	0.463668	0.50436	0.504131	0.496042	0.397078	0.509117	0.524577	0.41946	0.456284	0.492658	0.419349	0.464068	0.513515	0.47091	0.409937	0.446754	0.431735	0.499486	0.510361	0.447562	0.508837	0.448628	0.474434	0.440785	0.495986	0.424587	0.517371	0.455511	0.496232	0.505445	0.486089	0.532809	0.45157	0.509766	0.495847	0.462677
Th1 cells	0.369177	0.314059	0.294053	0.329124	0.276122	0.377677	0.333894	0.342592	0.347069	0.340007	0.327196	0.373819	0.37661	0.367885	0.386616	0.314363	0.280526	0.400854	0.358968	0.405904	0.384122	0.325403	0.323452	0.323385	0.281456	0.354989	0.360467	0.330803	0.414368	0.3769	0.34818	0.365803	0.385122	0.380498	0.357074	0.351052	0.356084	0.383791	0.379702	0.39576	0.369441	0.349016	0.37719	0.346318
Th2 cells	0.539335	0.543606	0.470175	0.4706	0.425193	0.53317	0.547291	0.587585	0.543927	0.593687	0.540489	0.45562	0.502545	0.467267	0.411319	0.39211	0.574596	0.595289	0.526878	0.537974	0.632288	0.495922	0.580536	0.359725	0.395902	0.514512	0.523932	0.511171	0.527501	0.584372	0.489041	0.550878	0.584794	0.574089	0.50189	0.531204	0.611361	0.524898	0.573738	0.606984	0.622463	0.527232	0.602591	0.616202
Tregs	0.380684	0.310558	0.339611	0.364951	0.243726	0.330675	0.326512	0.281504	0.308007	0.352379	0.318553	0.282333	0.341329	0.388948	0.295652	0.191382	0.171547	0.417355	0.270726	0.395071	0.415717	0.266772	0.270315	0.242527	0.216898	0.329773	0.380297	0.24759	0.421169	0.333098	0.339112	0.247055	0.363699	0.328485	0.319662	0.305384	0.429033	0.394626	0.320183	0.410467	0.361673	0.376165	0.371761	0.245366
aDC	0.17159	0.10594	0.0986774	0.170975	0.0854706	0.125941	0.119153	0.0957425	0.0958301	0.193864	0.0837739	0.169321	0.201345	0.195219	0.223344	0.187994	0.075724	0.156085	0.155081	0.214819	0.227629	0.0592729	0.051656	0.223164	0.0554084	0.203183	0.148464	0.127882	0.235857	0.134039	0.158704	0.100585	0.122915	0.138068	0.138468	0.128149	0.219836	0.103879	0.189049	0.231155	0.166229	0.157292	0.182874	0.0905119
iDC	0.521141	0.475659	0.445858	0.453509	0.485696	0.472599	0.494851	0.474642	0.492726	0.492804	0.469114	0.535737	0.478867	0.470018	0.454649	0.506046	0.480695	0.519884	0.47407	0.467452	0.497451	0.445043	0.486622	0.401072	0.440157	0.467713	0.499261	0.444426	0.437271	0.466252	0.462927	0.4596	0.4694	0.474115	0.449034	0.458105	0.510827	0.52887	0.462173	0.426892	0.468822	0.494313	0.501897	0.412959
pDC	0.587351	0.598529	0.561374	0.613965	0.572617	0.609836	0.619976	0.616374	0.639956	0.60799	0.600578	0.620176	0.630945	0.567595	0.635942	0.57959	0.643615	0.634152	0.653887	0.642187	0.646394	0.585689	0.588465	0.624944	0.585637	0.609656	0.581177	0.617799	0.629131	0.646867	0.602027	0.629024	0.630048	0.645791	0.643272	0.638584	0.605259	0.619189	0.644169	0.611649	0.662066	0.590139	0.641847	0.620345

## Sheet: S9
Cell.types	pvalue	FDR
B-cells	0.0634193	0.0872016
CD4+ T-cells	0.146517	0.179076
CD4+ Tcm	0.00094128	0.00640125
CD4+ Tem	0.0301175	0.0509681
CD8+ T-cells	0.0172009	0.0473026
CD8+ Tcm	0.00036192	0.00398111
CD8+ Tem	0.0251389	0.0502777
Eosinophils	0.00126171	0.00640125
Macrophages	0.0328941	0.0516908
Mast cells	2.05e-05	0.00045109
Memory B-cells	1	1
Monocytes	0.00831604	0.0304921
NK cells	0.112872	0.146069
NKT	0.0301175	0.0509681
Neutrophils	0.0251389	0.0502777
Tgd cells	0.275627	0.288752
Th1 cells	0.0114727	0.0360571
Th2 cells	0.209928	0.243074
Tregs	0.275627	0.288752
aDC	0.0208583	0.0502777
iDC	0.0542455	0.07956
pDC	0.00145483	0.00640125

## Sheet: S10
Gene Symbol	Geneset	Category
STAT1	STAT1_score	Prognostic and Predictive Signatures
CXCL10	STAT1_score	Prognostic and Predictive Signatures
TAP1	STAT1_score	Prognostic and Predictive Signatures
CXCL11	STAT1_score	Prognostic and Predictive Signatures
INDO	STAT1_score	Prognostic and Predictive Signatures
CXCL9	STAT1_score	Prognostic and Predictive Signatures
MX1	STAT1_score	Prognostic and Predictive Signatures
LAMP3	STAT1_score	Prognostic and Predictive Signatures
ISG15	STAT1_score	Prognostic and Predictive Signatures
RTP4	STAT1_score	Prognostic and Predictive Signatures
HERC6	STAT1_score	Prognostic and Predictive Signatures
IFI44L	STAT1_score	Prognostic and Predictive Signatures
MX2	STAT1_score	Prognostic and Predictive Signatures
IFIT3	STAT1_score	Prognostic and Predictive Signatures
HERC5	STAT1_score	Prognostic and Predictive Signatures
RSAD2	STAT1_score	Prognostic and Predictive Signatures
DDX58	STAT1_score	Prognostic and Predictive Signatures
CCL5	STAT1_score	Prognostic and Predictive Signatures
ADAMDEC1	STAT1_score	Prognostic and Predictive Signatures
CD2	STAT1_score	Prognostic and Predictive Signatures
HCP5	STAT1_score	Prognostic and Predictive Signatures
NMI	STAT1_score	Prognostic and Predictive Signatures
SPOCK2	STAT1_score	Prognostic and Predictive Signatures
CCL8	STAT1_score	Prognostic and Predictive Signatures
TRIM22	STAT1_score	Prognostic and Predictive Signatures
LYZ	STAT1_score	Prognostic and Predictive Signatures
IRF1	STAT1_score	Prognostic and Predictive Signatures
LAG3	STAT1_score	Prognostic and Predictive Signatures
PSCDBP	STAT1_score	Prognostic and Predictive Signatures
TFEC	STAT1_score	Prognostic and Predictive Signatures
UBD	STAT1_score	Prognostic and Predictive Signatures
SP140	STAT1_score	Prognostic and Predictive Signatures
CTSC	STAT1_score	Prognostic and Predictive Signatures
IFI6	STAT1_score	Prognostic and Predictive Signatures
PLA2G7	STAT1_score	Prognostic and Predictive Signatures
CD3G	STAT1_score	Prognostic and Predictive Signatures
ECGF1	STAT1_score	Prognostic and Predictive Signatures
PLAC8	STAT1_score	Prognostic and Predictive Signatures
FGL2	STAT1_score	Prognostic and Predictive Signatures
GZMK	STAT1_score	Prognostic and Predictive Signatures
CD48	STAT1_score	Prognostic and Predictive Signatures
STAT4	STAT1_score	Prognostic and Predictive Signatures
GPR18	STAT1_score	Prognostic and Predictive Signatures
P2RX5	STAT1_score	Prognostic and Predictive Signatures
IFI30	STAT1_score	Prognostic and Predictive Signatures
SH2D1A	STAT1_score	Prognostic and Predictive Signatures
LAPTM5	STAT1_score	Prognostic and Predictive Signatures
CD69	STAT1_score	Prognostic and Predictive Signatures
PTPN7	STAT1_score	Prognostic and Predictive Signatures
IRF8	STAT1_score	Prognostic and Predictive Signatures
PIM2	STAT1_score	Prognostic and Predictive Signatures
ETV7	STAT1_score	Prognostic and Predictive Signatures
GPR171	STAT1_score	Prognostic and Predictive Signatures
PSME1	STAT1_score	Prognostic and Predictive Signatures
BIRC3	STAT1_score	Prognostic and Predictive Signatures
FASLG	STAT1_score	Prognostic and Predictive Signatures
IFITM1	STAT1_score	Prognostic and Predictive Signatures
IFIT5	STAT1_score	Prognostic and Predictive Signatures
ITGB2	STAT1_score	Prognostic and Predictive Signatures
BTN3A2	STAT1_score	Prognostic and Predictive Signatures
HCLS1	STAT1_score	Prognostic and Predictive Signatures
SECTM1	STAT1_score	Prognostic and Predictive Signatures
ARHGAP15	STAT1_score	Prognostic and Predictive Signatures
KLRK1	STAT1_score	Prognostic and Predictive Signatures
IGSF6	STAT1_score	Prognostic and Predictive Signatures
EBI2	STAT1_score	Prognostic and Predictive Signatures
SNX10	STAT1_score	Prognostic and Predictive Signatures
BST2	STAT1_score	Prognostic and Predictive Signatures
APOC1	STAT1_score	Prognostic and Predictive Signatures
ZC3HAV1	STAT1_score	Prognostic and Predictive Signatures
DDAH2	STAT1_score	Prognostic and Predictive Signatures
LILRA4	STAT1_score	Prognostic and Predictive Signatures
EBI3	STAT1_score	Prognostic and Predictive Signatures
KLRC3	STAT1_score	Prognostic and Predictive Signatures
CLEC4A	STAT1_score	Prognostic and Predictive Signatures
CD40LG	STAT1_score	Prognostic and Predictive Signatures
VAV1	STAT1_score	Prognostic and Predictive Signatures
GLRX	STAT1_score	Prognostic and Predictive Signatures
ACP5	STAT1_score	Prognostic and Predictive Signatures
RFX5	STAT1_score	Prognostic and Predictive Signatures
CECR1	STAT1_score	Prognostic and Predictive Signatures
TRAF3	STAT1_score	Prognostic and Predictive Signatures
RAB8A	STAT1_score	Prognostic and Predictive Signatures
IL18	STAT1_score	Prognostic and Predictive Signatures
EFNA1	STAT1_score	Prognostic and Predictive Signatures
RASGRP1	STAT1_score	Prognostic and Predictive Signatures
REC8L1	STAT1_score	Prognostic and Predictive Signatures
CCRL2	STAT1_score	Prognostic and Predictive Signatures
DNAL4	STAT1_score	Prognostic and Predictive Signatures
IFI44	Module3_IFN_score	Prognostic and Predictive Signatures
IFI44L	Module3_IFN_score	Prognostic and Predictive Signatures
DDX58	Module3_IFN_score	Prognostic and Predictive Signatures
IFI6	Module3_IFN_score	Prognostic and Predictive Signatures
IFI27	Module3_IFN_score	Prognostic and Predictive Signatures
IFIT2	Module3_IFN_score	Prognostic and Predictive Signatures
IFIT1	Module3_IFN_score	Prognostic and Predictive Signatures
IFIT3	Module3_IFN_score	Prognostic and Predictive Signatures
CXCL10	Module3_IFN_score	Prognostic and Predictive Signatures
MX1	Module3_IFN_score	Prognostic and Predictive Signatures
OAS1	Module3_IFN_score	Prognostic and Predictive Signatures
OAS2	Module3_IFN_score	Prognostic and Predictive Signatures
OAS3	Module3_IFN_score	Prognostic and Predictive Signatures
HERC5	Module3_IFN_score	Prognostic and Predictive Signatures
SAMD9	Module3_IFN_score	Prognostic and Predictive Signatures
HERC6	Module3_IFN_score	Prognostic and Predictive Signatures
DDX60	Module3_IFN_score	Prognostic and Predictive Signatures
RTP4	Module3_IFN_score	Prognostic and Predictive Signatures
IFIH1	Module3_IFN_score	Prognostic and Predictive Signatures
STAT1	Module3_IFN_score	Prognostic and Predictive Signatures
TAP1	Module3_IFN_score	Prognostic and Predictive Signatures
OASL	Module3_IFN_score	Prognostic and Predictive Signatures
RSAD2	Module3_IFN_score	Prognostic and Predictive Signatures
ISG15	Module3_IFN_score	Prognostic and Predictive Signatures
MAP3K10	IFNG_score_21050467	Prognostic and Predictive Signatures
CSRP3	IFNG_score_21050467	Prognostic and Predictive Signatures
FOSL1	IFNG_score_21050467	Prognostic and Predictive Signatures
SKP1A	IFNG_score_21050467	Prognostic and Predictive Signatures
HLA-B	IFNG_score_21050467	Prognostic and Predictive Signatures
SF3A1	IFNG_score_21050467	Prognostic and Predictive Signatures
XRCC6	IFNG_score_21050467	Prognostic and Predictive Signatures
CEBPD	IFNG_score_21050467	Prognostic and Predictive Signatures
HLA-A	IFNG_score_21050467	Prognostic and Predictive Signatures
NMI	IFNG_score_21050467	Prognostic and Predictive Signatures
IFI35	IFNG_score_21050467	Prognostic and Predictive Signatures
HIF3A	IFNG_score_21050467	Prognostic and Predictive Signatures
TAS2R5	IFNG_score_21050467	Prognostic and Predictive Signatures
C1S	IFNG_score_21050467	Prognostic and Predictive Signatures
SHFM1	IFNG_score_21050467	Prognostic and Predictive Signatures
COL16A1	IFNG_score_21050467	Prognostic and Predictive Signatures
PSME1	IFNG_score_21050467	Prognostic and Predictive Signatures
IFITM1	IFNG_score_21050467	Prognostic and Predictive Signatures
CYCS	IFNG_score_21050467	Prognostic and Predictive Signatures
BAK1	IFNG_score_21050467	Prognostic and Predictive Signatures
EPS15	IFNG_score_21050467	Prognostic and Predictive Signatures
GBP1	IFNG_score_21050467	Prognostic and Predictive Signatures
FAS	IFNG_score_21050467	Prognostic and Predictive Signatures
PML	IFNG_score_21050467	Prognostic and Predictive Signatures
HADH	IFNG_score_21050467	Prognostic and Predictive Signatures
EIF2B1	IFNG_score_21050467	Prognostic and Predictive Signatures
HLA-E	IFNG_score_21050467	Prognostic and Predictive Signatures
HADHB	IFNG_score_21050467	Prognostic and Predictive Signatures
IRF1	IFNG_score_21050467	Prognostic and Predictive Signatures
ADAR	IFNG_score_21050467	Prognostic and Predictive Signatures
IFIT3	IFNG_score_21050467	Prognostic and Predictive Signatures
SDCBP	IFNG_score_21050467	Prognostic and Predictive Signatures
ATP6V0B	IFNG_score_21050467	Prognostic and Predictive Signatures
ZFP36L2	IFNG_score_21050467	Prognostic and Predictive Signatures
TRIM21	IFNG_score_21050467	Prognostic and Predictive Signatures
PRAME	IFNG_score_21050467	Prognostic and Predictive Signatures
ELK4	IFNG_score_21050467	Prognostic and Predictive Signatures
BBC3	IFNG_score_21050467	Prognostic and Predictive Signatures
PSMB10	IFNG_score_21050467	Prognostic and Predictive Signatures
CASP8	IFNG_score_21050467	Prognostic and Predictive Signatures
PHLDA1	IFNG_score_21050467	Prognostic and Predictive Signatures
PPP3CA	IFNG_score_21050467	Prognostic and Predictive Signatures
BTG1	IFNG_score_21050467	Prognostic and Predictive Signatures
RBBP4	IFNG_score_21050467	Prognostic and Predictive Signatures
PMAIP1	IFNG_score_21050467	Prognostic and Predictive Signatures
TEAD4	IFNG_score_21050467	Prognostic and Predictive Signatures
SRP9	IFNG_score_21050467	Prognostic and Predictive Signatures
ISG15	IFNG_score_21050467	Prognostic and Predictive Signatures
BST2	IFNG_score_21050467	Prognostic and Predictive Signatures
PYHIN1	IFNG_score_21050467	Prognostic and Predictive Signatures
IL15RA	IFNG_score_21050467	Prognostic and Predictive Signatures
VEGFC	IFNG_score_21050467	Prognostic and Predictive Signatures
RHOC	IFNG_score_21050467	Prognostic and Predictive Signatures
PLOD2	IFNG_score_21050467	Prognostic and Predictive Signatures
NULL	IFNG_score_21050467	Prognostic and Predictive Signatures
STAT1	IFNG_score_21050467	Prognostic and Predictive Signatures
PSMB8	IFNG_score_21050467	Prognostic and Predictive Signatures
SFRS2	IFNG_score_21050467	Prognostic and Predictive Signatures
VAT1	IFNG_score_21050467	Prognostic and Predictive Signatures
PARP1	IFNG_score_21050467	Prognostic and Predictive Signatures
ICAM1	IFNG_score_21050467	Prognostic and Predictive Signatures
TAP1	IFNG_score_21050467	Prognostic and Predictive Signatures
IL6	IFNG_score_21050467	Prognostic and Predictive Signatures
BAG1	IFNG_score_21050467	Prognostic and Predictive Signatures
RSAD2	Interferon_19272155	Prognostic and Predictive Signatures
OAS3	Interferon_19272155	Prognostic and Predictive Signatures
IFI44	Interferon_19272155	Prognostic and Predictive Signatures
ISG15	Interferon_19272155	Prognostic and Predictive Signatures
DDX60	Interferon_19272155	Prognostic and Predictive Signatures
IFI44L	Interferon_19272155	Prognostic and Predictive Signatures
IFI6	Interferon_19272155	Prognostic and Predictive Signatures
MX1	Interferon_19272155	Prognostic and Predictive Signatures
IFIT3	Interferon_19272155	Prognostic and Predictive Signatures
IFI27	Interferon_19272155	Prognostic and Predictive Signatures
IFIT1	Interferon_19272155	Prognostic and Predictive Signatures
OAS1	Interferon_19272155	Prognostic and Predictive Signatures
OAS2	Interferon_19272155	Prognostic and Predictive Signatures
HLA-G	MHC.I_19272155	Prognostic and Predictive Signatures
HLA-A	MHC.I_19272155	Prognostic and Predictive Signatures
HLA-B	MHC.I_19272155	Prognostic and Predictive Signatures
HLA-C	MHC.I_19272155	Prognostic and Predictive Signatures
HLA-F	MHC.I_19272155	Prognostic and Predictive Signatures
CTSS	MHC.II_19272155	Prognostic and Predictive Signatures
CD74	MHC.II_19272155	Prognostic and Predictive Signatures
HLA-DRB1	MHC.II_19272155	Prognostic and Predictive Signatures
HLA-DQA1	MHC.II_19272155	Prognostic and Predictive Signatures
HLA-DMB	MHC.II_19272155	Prognostic and Predictive Signatures
HLA-DPA1	MHC.II_19272155	Prognostic and Predictive Signatures
HLA-DPB1	MHC.II_19272155	Prognostic and Predictive Signatures
HLA-DMA	MHC.II_19272155	Prognostic and Predictive Signatures
HLA-DRA	MHC.II_19272155	Prognostic and Predictive Signatures
LCP2	MHC.II_19272155	Prognostic and Predictive Signatures
SRGN	MHC.II_19272155	Prognostic and Predictive Signatures
PTPRC	MHC.II_19272155	Prognostic and Predictive Signatures
TAP1	STAT1_19272155	Prognostic and Predictive Signatures
GBP1	STAT1_19272155	Prognostic and Predictive Signatures
IFIH1	STAT1_19272155	Prognostic and Predictive Signatures
PSMB9	STAT1_19272155	Prognostic and Predictive Signatures
CXCL9	STAT1_19272155	Prognostic and Predictive Signatures
IRF1	STAT1_19272155	Prognostic and Predictive Signatures
CXCL11	STAT1_19272155	Prognostic and Predictive Signatures
CXCL10	STAT1_19272155	Prognostic and Predictive Signatures
IDO1	STAT1_19272155	Prognostic and Predictive Signatures
STAT1	STAT1_19272155	Prognostic and Predictive Signatures
C19orf66	Interferon_Cluster_21214954	Prognostic and Predictive Signatures
BST2	Interferon_Cluster_21214954	Prognostic and Predictive Signatures
SP110	Interferon_Cluster_21214954	Prognostic and Predictive Signatures
PARP12	Interferon_Cluster_21214954	Prognostic and Predictive Signatures
IFIT5	Interferon_Cluster_21214954	Prognostic and Predictive Signatures
OAS1	Interferon_Cluster_21214954	Prognostic and Predictive Signatures
IRF9	Interferon_Cluster_21214954	Prognostic and Predictive Signatures
USP18	Interferon_Cluster_21214954	Prognostic and Predictive Signatures
DDX58	Interferon_Cluster_21214954	Prognostic and Predictive Signatures
MX2	Interferon_Cluster_21214954	Prognostic and Predictive Signatures
IFI27	Interferon_Cluster_21214954	Prognostic and Predictive Signatures
OAS2	Interferon_Cluster_21214954	Prognostic and Predictive Signatures
IFI6	Interferon_Cluster_21214954	Prognostic and Predictive Signatures
IFIT3	Interferon_Cluster_21214954	Prognostic and Predictive Signatures
IFI44L	Interferon_Cluster_21214954	Prognostic and Predictive Signatures
IFI44	Interferon_Cluster_21214954	Prognostic and Predictive Signatures
IFIT1	Interferon_Cluster_21214954	Prognostic and Predictive Signatures
ISG15	Interferon_Cluster_21214954	Prognostic and Predictive Signatures
MX1	Interferon_Cluster_21214954	Prognostic and Predictive Signatures
RSAD2	Interferon_Cluster_21214954	Prognostic and Predictive Signatures
OAS3	Interferon_Cluster_21214954	Prognostic and Predictive Signatures
HERC6	Interferon_Cluster_21214954	Prognostic and Predictive Signatures
HERC5	Interferon_Cluster_21214954	Prognostic and Predictive Signatures
DDX60	Interferon_Cluster_21214954	Prognostic and Predictive Signatures
PLSCR1	Interferon_Cluster_21214954	Prognostic and Predictive Signatures
UBE2L6	Interferon_Cluster_21214954	Prognostic and Predictive Signatures
SAMD9	Interferon_Cluster_21214954	Prognostic and Predictive Signatures
RTP4	Interferon_Cluster_21214954	Prognostic and Predictive Signatures
XAF1	Interferon_Cluster_21214954	Prognostic and Predictive Signatures
NMI	Interferon_Cluster_21214954	Prognostic and Predictive Signatures
IFITM1	Interferon_Cluster_21214954	Prognostic and Predictive Signatures
IFITM3	Interferon_Cluster_21214954	Prognostic and Predictive Signatures
ISG20	Interferon_Cluster_21214954	Prognostic and Predictive Signatures
PSME2	Interferon_Cluster_21214954	Prognostic and Predictive Signatures
PSME1	Interferon_Cluster_21214954	Prognostic and Predictive Signatures
IRF7	Interferon_Cluster_21214954	Prognostic and Predictive Signatures
IFI27	IFN_21978456	Prognostic and Predictive Signatures
MX1	IFN_21978456	Prognostic and Predictive Signatures
ISG15	IFN_21978456	Prognostic and Predictive Signatures
IFIT1	IFN_21978456	Prognostic and Predictive Signatures
IFIT3	IFN_21978456	Prognostic and Predictive Signatures
RSAD2	IFN_21978456	Prognostic and Predictive Signatures
IFI44L	IFN_21978456	Prognostic and Predictive Signatures
IFI44	IFN_21978456	Prognostic and Predictive Signatures
OAS1	IFN_21978456	Prognostic and Predictive Signatures
OAS2	IFN_21978456	Prognostic and Predictive Signatures
OAS3	IFN_21978456	Prognostic and Predictive Signatures
HERC6	IFN_21978456	Prognostic and Predictive Signatures
OASL	IFN_21978456	Prognostic and Predictive Signatures
HLA-A	APM1	Prognostic and Predictive Signatures
HLA-B	APM1	Prognostic and Predictive Signatures
HLA-C	APM1	Prognostic and Predictive Signatures
TAP1	APM1	Prognostic and Predictive Signatures
TAP2	APM1	Prognostic and Predictive Signatures
TAPBP	APM1	Prognostic and Predictive Signatures
B2M	APM1	Prognostic and Predictive Signatures
HLA-DMA	APM2	Prognostic and Predictive Signatures
HLA-DMB	APM2	Prognostic and Predictive Signatures
HLA-DOA	APM2	Prognostic and Predictive Signatures
HLA-DOB	APM2	Prognostic and Predictive Signatures
HLA-DPA1	APM2	Prognostic and Predictive Signatures
HLA-DPB1	APM2	Prognostic and Predictive Signatures
HLA-DPB2	APM2	Prognostic and Predictive Signatures
HLA-DQA1	APM2	Prognostic and Predictive Signatures
HLA-DQA2	APM2	Prognostic and Predictive Signatures
HLA-DQB1	APM2	Prognostic and Predictive Signatures
HLA-DQB2	APM2	Prognostic and Predictive Signatures
HLA-DRA	APM2	Prognostic and Predictive Signatures
HLA-DRB1	APM2	Prognostic and Predictive Signatures
HLA-DRB5	APM2	Prognostic and Predictive Signatures
HLA-DRB6	APM2	Prognostic and Predictive Signatures
IFIT3	IFIT3	Prognostic and Predictive Signatures
IFI44L	IFIT3	Prognostic and Predictive Signatures
IFIT1	IFIT3	Prognostic and Predictive Signatures
RSAD2	IFIT3	Prognostic and Predictive Signatures
MX1	IFIT3	Prognostic and Predictive Signatures
IFI44	IFIT3	Prognostic and Predictive Signatures
OAS2	IFIT3	Prognostic and Predictive Signatures
CMPK2	IFIT3	Prognostic and Predictive Signatures
IFI6	IFIT3	Prognostic and Predictive Signatures
IFIT2	IFIT3	Prognostic and Predictive Signatures
IFI27	ISG.RS	Prognostic and Predictive Signatures
IRF7	ISG.RS	Prognostic and Predictive Signatures
USP18	ISG.RS	Prognostic and Predictive Signatures
BST2	ISG.RS	Prognostic and Predictive Signatures
CXCL10	ISG.RS	Prognostic and Predictive Signatures
DDX60	ISG.RS	Prognostic and Predictive Signatures
HERC6	ISG.RS	Prognostic and Predictive Signatures
HLA-B	ISG.RS	Prognostic and Predictive Signatures
HLA-G	ISG.RS	Prognostic and Predictive Signatures
IFI35	ISG.RS	Prognostic and Predictive Signatures
IFI44	ISG.RS	Prognostic and Predictive Signatures
IFI44L	ISG.RS	Prognostic and Predictive Signatures
IFIT1	ISG.RS	Prognostic and Predictive Signatures
IFIT3	ISG.RS	Prognostic and Predictive Signatures
ISG15	ISG.RS	Prognostic and Predictive Signatures
LGALS3BP	ISG.RS	Prognostic and Predictive Signatures
LY6E	ISG.RS	Prognostic and Predictive Signatures
MX1	ISG.RS	Prognostic and Predictive Signatures
MX2	ISG.RS	Prognostic and Predictive Signatures
OAS3	ISG.RS	Prognostic and Predictive Signatures
OASL	ISG.RS	Prognostic and Predictive Signatures
PLSCR1	ISG.RS	Prognostic and Predictive Signatures
STAT1	ISG.RS	Prognostic and Predictive Signatures
TRIM14	ISG.RS	Prognostic and Predictive Signatures
HSD17B1	ISG.RS	Prognostic and Predictive Signatures
OAS1	ISG.RS	Prognostic and Predictive Signatures
CA2	ISG.RS	Prognostic and Predictive Signatures
CCNA1	ISG.RS	Prognostic and Predictive Signatures
CXCL1	ISG.RS	Prognostic and Predictive Signatures
GALC	ISG.RS	Prognostic and Predictive Signatures
IFI6	ISG.RS	Prognostic and Predictive Signatures
IFITM1	ISG.RS	Prognostic and Predictive Signatures
LAMP3	ISG.RS	Prognostic and Predictive Signatures
MCL1	ISG.RS	Prognostic and Predictive Signatures
ROBO1	ISG.RS	Prognostic and Predictive Signatures
SLC6A15	ISG.RS	Prognostic and Predictive Signatures
THBS1	ISG.RS	Prognostic and Predictive Signatures
TIMP3	ISG.RS	Prognostic and Predictive Signatures
TNFSF10	IFNG.GS	Prognostic and Predictive Signatures
IRF9	IFNG.GS	Prognostic and Predictive Signatures
PSMB9	IFNG.GS	Prognostic and Predictive Signatures
EPSTI1	IFNG.GS	Prognostic and Predictive Signatures
PARP12	IFNG.GS	Prognostic and Predictive Signatures
TRIM25	IFNG.GS	Prognostic and Predictive Signatures
LAP3	IFNG.GS	Prognostic and Predictive Signatures
CASP7	IFNG.GS	Prognostic and Predictive Signatures
UPP1	IFNG.GS	Prognostic and Predictive Signatures
B2M	IFNG.GS	Prognostic and Predictive Signatures
IRF4	IFNG.GS	Prognostic and Predictive Signatures
SRI	IFNG.GS	Prognostic and Predictive Signatures
NFKBIA	IFNG.GS	Prognostic and Predictive Signatures
IFIT2	IFNG.GS	Prognostic and Predictive Signatures
OAS2	IFNG.GS	Prognostic and Predictive Signatures
TAP1	IFNG.GS	Prognostic and Predictive Signatures
EIF2AK2	IFNG.GS	Prognostic and Predictive Signatures
RSAD2	IFNG.GS	Prognostic and Predictive Signatures
IRF1	IFNG.GS	Prognostic and Predictive Signatures
XAF1	IFNG.GS	Prognostic and Predictive Signatures
SP110	IFNG.GS	Prognostic and Predictive Signatures
PSMB8	IFNG.GS	Prognostic and Predictive Signatures
IFITM3	IFNG.GS	Prognostic and Predictive Signatures
GBP4	IFNG.GS	Prognostic and Predictive Signatures
IRF8	IFNG.GS	Prognostic and Predictive Signatures
PML	IFNG.GS	Prognostic and Predictive Signatures
IFIH1	IFNG.GS	Prognostic and Predictive Signatures
UBE2L6	IFNG.GS	Prognostic and Predictive Signatures
ADAR	IFNG.GS	Prognostic and Predictive Signatures
STAT2	IFNG.GS	Prognostic and Predictive Signatures
CXCL9	IFNG.GS	Prognostic and Predictive Signatures
IL10RA	IFNG.GS	Prognostic and Predictive Signatures
PLA2G4A	IFNG.GS	Prognostic and Predictive Signatures
TRIM21	IFNG.GS	Prognostic and Predictive Signatures
PTGS2	IFNG.GS	Prognostic and Predictive Signatures
C1S	IFNG.GS	Prognostic and Predictive Signatures
DDX58	IFNG.GS	Prognostic and Predictive Signatures
IL15	IFNG.GS	Prognostic and Predictive Signatures
NLRC5	IFNG.GS	Prognostic and Predictive Signatures
NMI	IFNG.GS	Prognostic and Predictive Signatures
IDO1	IFNG.GS	Prognostic and Predictive Signatures
PSMB10	IFNG.GS	Prognostic and Predictive Signatures
CXCL11	IFNG.GS	Prognostic and Predictive Signatures
ITGB7	IFNG.GS	Prognostic and Predictive Signatures
SAMHD1	IFNG.GS	Prognostic and Predictive Signatures
CMPK2	IFNG.GS	Prognostic and Predictive Signatures
SAMD9L	IFNG.GS	Prognostic and Predictive Signatures
RTP4	IFNG.GS	Prognostic and Predictive Signatures
PTPN2	IFNG.GS	Prognostic and Predictive Signatures
PARP14	IFNG.GS	Prognostic and Predictive Signatures
TNFAIP2	IFNG.GS	Prognostic and Predictive Signatures
IFITM2	IFNG.GS	Prognostic and Predictive Signatures
SOCS1	IFNG.GS	Prognostic and Predictive Signatures
CASP1	IFNG.GS	Prognostic and Predictive Signatures
ICAM1	IFNG.GS	Prognostic and Predictive Signatures
WARS	IFNG.GS	Prognostic and Predictive Signatures
PSME1	IFNG.GS	Prognostic and Predictive Signatures
ISG20	IFNG.GS	Prognostic and Predictive Signatures
IRF2	IFNG.GS	Prognostic and Predictive Signatures
FCGR1A	IFNG.GS	Prognostic and Predictive Signatures
2021-03-01	IFNG.GS	Prognostic and Predictive Signatures
SOCS3	IFNG.GS	Prognostic and Predictive Signatures
JAK2	IFNG.GS	Prognostic and Predictive Signatures
HLA-DMA	IFNG.GS	Prognostic and Predictive Signatures
TNFAIP6	IFNG.GS	Prognostic and Predictive Signatures
TRIM26	IFNG.GS	Prognostic and Predictive Signatures
VCAM1	IFNG.GS	Prognostic and Predictive Signatures
CD274	IFNG.GS	Prognostic and Predictive Signatures
CIITA	IFNG.GS	Prognostic and Predictive Signatures
NAMPT	IFNG.GS	Prognostic and Predictive Signatures
SELP	IFNG.GS	Prognostic and Predictive Signatures
GPR18	IFNG.GS	Prognostic and Predictive Signatures
FPR1	IFNG.GS	Prognostic and Predictive Signatures
PRIC285	IFNG.GS	Prognostic and Predictive Signatures
PSME2	IFNG.GS	Prognostic and Predictive Signatures
SERPING1	IFNG.GS	Prognostic and Predictive Signatures
CCL5	IFNG.GS	Prognostic and Predictive Signatures
RNF31	IFNG.GS	Prognostic and Predictive Signatures
SOD2	IFNG.GS	Prognostic and Predictive Signatures
PSMA3	IFNG.GS	Prognostic and Predictive Signatures
RNF213	IFNG.GS	Prognostic and Predictive Signatures
PELI1	IFNG.GS	Prognostic and Predictive Signatures
CFB	IFNG.GS	Prognostic and Predictive Signatures
CD86	IFNG.GS	Prognostic and Predictive Signatures
TXNIP	IFNG.GS	Prognostic and Predictive Signatures
HLA-DQA1	IFNG.GS	Prognostic and Predictive Signatures
GCH1	IFNG.GS	Prognostic and Predictive Signatures
PNP	IFNG.GS	Prognostic and Predictive Signatures
CCL7	IFNG.GS	Prognostic and Predictive Signatures
PTPN6	IFNG.GS	Prognostic and Predictive Signatures
SPPL2A	IFNG.GS	Prognostic and Predictive Signatures
IL4R	IFNG.GS	Prognostic and Predictive Signatures
PNPT1	IFNG.GS	Prognostic and Predictive Signatures
DHX58	IFNG.GS	Prognostic and Predictive Signatures
BTG1	IFNG.GS	Prognostic and Predictive Signatures
CASP8	IFNG.GS	Prognostic and Predictive Signatures
IFI30	IFNG.GS	Prognostic and Predictive Signatures
CCL2	IFNG.GS	Prognostic and Predictive Signatures
FGL2	IFNG.GS	Prognostic and Predictive Signatures
SECTM1	IFNG.GS	Prognostic and Predictive Signatures
IL15RA	IFNG.GS	Prognostic and Predictive Signatures
CD40	IFNG.GS	Prognostic and Predictive Signatures
TRAFD1	IFNG.GS	Prognostic and Predictive Signatures
HLA-DRB1	IFNG.GS	Prognostic and Predictive Signatures
GBP6	IFNG.GS	Prognostic and Predictive Signatures
LCP2	IFNG.GS	Prognostic and Predictive Signatures
MT2A	IFNG.GS	Prognostic and Predictive Signatures
RIPK1	IFNG.GS	Prognostic and Predictive Signatures
KLRK1	IFNG.GS	Prognostic and Predictive Signatures
PSMB2	IFNG.GS	Prognostic and Predictive Signatures
TDRD7	IFNG.GS	Prognostic and Predictive Signatures
HIF1A	IFNG.GS	Prognostic and Predictive Signatures
EIF4E3	IFNG.GS	Prognostic and Predictive Signatures
VAMP8	IFNG.GS	Prognostic and Predictive Signatures
PFKP	IFNG.GS	Prognostic and Predictive Signatures
CD38	IFNG.GS	Prognostic and Predictive Signatures
ZBP1	IFNG.GS	Prognostic and Predictive Signatures
BANK1	IFNG.GS	Prognostic and Predictive Signatures
TOR1B	IFNG.GS	Prognostic and Predictive Signatures
RBCK1	IFNG.GS	Prognostic and Predictive Signatures
PDE4B	IFNG.GS	Prognostic and Predictive Signatures
MVP	IFNG.GS	Prognostic and Predictive Signatures
IL7	IFNG.GS	Prognostic and Predictive Signatures
BPGM	IFNG.GS	Prognostic and Predictive Signatures
FTSJD2	IFNG.GS	Prognostic and Predictive Signatures
AUTS2	IFNG.GS	Prognostic and Predictive Signatures
RIPK2	IFNG.GS	Prognostic and Predictive Signatures
CD69	IFNG.GS	Prognostic and Predictive Signatures
MYD88	IFNG.GS	Prognostic and Predictive Signatures
PSMA2	IFNG.GS	Prognostic and Predictive Signatures
PIM1	IFNG.GS	Prognostic and Predictive Signatures
NOD1	IFNG.GS	Prognostic and Predictive Signatures
CFH	IFNG.GS	Prognostic and Predictive Signatures
TAPBP	IFNG.GS	Prognostic and Predictive Signatures
SLC25A28	IFNG.GS	Prognostic and Predictive Signatures
PTPN1	IFNG.GS	Prognostic and Predictive Signatures
TNFAIP3	IFNG.GS	Prognostic and Predictive Signatures
SSPN	IFNG.GS	Prognostic and Predictive Signatures
NUP93	IFNG.GS	Prognostic and Predictive Signatures
MTHFD2	IFNG.GS	Prognostic and Predictive Signatures
CDKN1A	IFNG.GS	Prognostic and Predictive Signatures
NFKB1	IFNG.GS	Prognostic and Predictive Signatures
BATF2	IFNG.GS	Prognostic and Predictive Signatures
LATS2	IFNG.GS	Prognostic and Predictive Signatures
IRF5	IFNG.GS	Prognostic and Predictive Signatures
SLAMF7	IFNG.GS	Prognostic and Predictive Signatures
ISOC1	IFNG.GS	Prognostic and Predictive Signatures
P2RY14	IFNG.GS	Prognostic and Predictive Signatures
STAT3	IFNG.GS	Prognostic and Predictive Signatures
NCOA3	IFNG.GS	Prognostic and Predictive Signatures
HLA-A	IFNG.GS	Prognostic and Predictive Signatures
IL6	IFNG.GS	Prognostic and Predictive Signatures
GZMA	IFNG.GS	Prognostic and Predictive Signatures
IFNAR2	IFNG.GS	Prognostic and Predictive Signatures
CD74	IFNG.GS	Prognostic and Predictive Signatures
RAPGEF6	IFNG.GS	Prognostic and Predictive Signatures
CASP4	IFNG.GS	Prognostic and Predictive Signatures
FAS	IFNG.GS	Prognostic and Predictive Signatures
OGFR	IFNG.GS	Prognostic and Predictive Signatures
ARL4A	IFNG.GS	Prognostic and Predictive Signatures
LYSMD2	IFNG.GS	Prognostic and Predictive Signatures
CSF2RB	IFNG.GS	Prognostic and Predictive Signatures
ST3GAL5	IFNG.GS	Prognostic and Predictive Signatures
C1R	IFNG.GS	Prognostic and Predictive Signatures
CASP3	IFNG.GS	Prognostic and Predictive Signatures
CMKLR1	IFNG.GS	Prognostic and Predictive Signatures
METTL7B	IFNG.GS	Prognostic and Predictive Signatures
ST8SIA4	IFNG.GS	Prognostic and Predictive Signatures
XCL1	IFNG.GS	Prognostic and Predictive Signatures
IL2RB	IFNG.GS	Prognostic and Predictive Signatures
VAMP5	IFNG.GS	Prognostic and Predictive Signatures
IL18BP	IFNG.GS	Prognostic and Predictive Signatures
ZNFX1	IFNG.GS	Prognostic and Predictive Signatures
ARID5B	IFNG.GS	Prognostic and Predictive Signatures
APOL6	IFNG.GS	Prognostic and Predictive Signatures
STAT4	IFNG.GS	Prognostic and Predictive Signatures
IFNG	ICR	Prognostic and Predictive Signatures
IRF1	ICR	Prognostic and Predictive Signatures
STAT1	ICR	Prognostic and Predictive Signatures
IL12B	ICR	Prognostic and Predictive Signatures
TBX21	ICR	Prognostic and Predictive Signatures
CD8A	ICR	Prognostic and Predictive Signatures
CD8B	ICR	Prognostic and Predictive Signatures
GZMB	ICR	Prognostic and Predictive Signatures
GNLY	ICR	Prognostic and Predictive Signatures
PRF1	ICR	Prognostic and Predictive Signatures
GZMH	ICR	Prognostic and Predictive Signatures
GZMA	ICR	Prognostic and Predictive Signatures
CXCL10	ICR	Prognostic and Predictive Signatures
CXCL9	ICR	Prognostic and Predictive Signatures
CCL5	ICR	Prognostic and Predictive Signatures
CTLA4	ICR	Prognostic and Predictive Signatures
PDCD1	ICR	Prognostic and Predictive Signatures
FOXP3	ICR	Prognostic and Predictive Signatures
IDO1	ICR	Prognostic and Predictive Signatures
CD274	ICR	Prognostic and Predictive Signatures
CCL5	TIS	Prognostic and Predictive Signatures
CXCL9	TIS	Prognostic and Predictive Signatures
CD27	TIS	Prognostic and Predictive Signatures
CXCR6	TIS	Prognostic and Predictive Signatures
IDO1	TIS	Prognostic and Predictive Signatures
STAT1	TIS	Prognostic and Predictive Signatures
TIGIT	TIS	Prognostic and Predictive Signatures
CD8A	TIS	Prognostic and Predictive Signatures
LAG3	TIS	Prognostic and Predictive Signatures
CD274	TIS	Prognostic and Predictive Signatures
PDCD1LG2	TIS	Prognostic and Predictive Signatures
CD276	TIS	Prognostic and Predictive Signatures
HLA-E	TIS	Prognostic and Predictive Signatures
NKG7	TIS	Prognostic and Predictive Signatures
PSMB10	TIS	Prognostic and Predictive Signatures
HLA-DQA1	TIS	Prognostic and Predictive Signatures
HLA-DRB1	TIS	Prognostic and Predictive Signatures
CMKLR1	TIS	Prognostic and Predictive Signatures
CD3G	T_Cell_Palmer	Prognostic and Predictive Signatures
LEF1	T_Cell_Palmer	Prognostic and Predictive Signatures
TCF7	T_Cell_Palmer	Prognostic and Predictive Signatures
CD3D	T_Cell_Palmer	Prognostic and Predictive Signatures
MAL	T_Cell_Palmer	Prognostic and Predictive Signatures
MRTFA	T_Cell_Palmer	Prognostic and Predictive Signatures
TIRAP	T_Cell_Palmer	Prognostic and Predictive Signatures
CD2	T_Cell_Palmer	Prognostic and Predictive Signatures
NR4A2	T_Cell_Palmer	Prognostic and Predictive Signatures
SNPH	T_Cell_Palmer	Prognostic and Predictive Signatures
TRAT1	T_Cell_Palmer	Prognostic and Predictive Signatures
CD28	T_Cell_Palmer	Prognostic and Predictive Signatures
LAT	T_Cell_Palmer	Prognostic and Predictive Signatures
SPNS1	T_Cell_Palmer	Prognostic and Predictive Signatures
ITGA6	T_Cell_Palmer	Prognostic and Predictive Signatures
FBLN5	T_Cell_Palmer	Prognostic and Predictive Signatures
BCL11B	T_Cell_Palmer	Prognostic and Predictive Signatures
IL7R	T_Cell_Palmer	Prognostic and Predictive Signatures
SEM1	T_Cell_Palmer	Prognostic and Predictive Signatures
AKTIP	T_Cell_Palmer	Prognostic and Predictive Signatures
ZAP70	T_Cell_Palmer	Prognostic and Predictive Signatures
TRB	T_Cell_Palmer	Prognostic and Predictive Signatures
APBA2	T_Cell_Palmer	Prognostic and Predictive Signatures
CCND2	T_Cell_Palmer	Prognostic and Predictive Signatures
ITK	T_Cell_Palmer	Prognostic and Predictive Signatures
FYB1	T_Cell_Palmer	Prognostic and Predictive Signatures
TNFRSF25	T_Cell_Palmer	Prognostic and Predictive Signatures
TXK	T_Cell_Palmer	Prognostic and Predictive Signatures
IL32	T_Cell_Palmer	Prognostic and Predictive Signatures
WNT10B	T_Cell_Palmer	Prognostic and Predictive Signatures
LEPROTL1	T_Cell_Palmer	Prognostic and Predictive Signatures
SLFN5	T_Cell_Palmer	Prognostic and Predictive Signatures
KLRK1	T_Cell_Palmer	Prognostic and Predictive Signatures
BEX3	T_Cell_Palmer	Prognostic and Predictive Signatures
RTKN2	T_Cell_Palmer	Prognostic and Predictive Signatures
BUB1B	T_Cell_Palmer	Prognostic and Predictive Signatures
INPP4B	T_Cell_Palmer	Prognostic and Predictive Signatures
GALT	T_Cell_Palmer	Prognostic and Predictive Signatures
PLXDC1	T_Cell_Palmer	Prognostic and Predictive Signatures
SPEG	T_Cell_Palmer	Prognostic and Predictive Signatures
INPP4A	T_Cell_Palmer	Prognostic and Predictive Signatures
CD6	T_Cell_Palmer	Prognostic and Predictive Signatures
DPP4	T_Cell_Palmer	Prognostic and Predictive Signatures
TRERF1	T_Cell_Palmer	Prognostic and Predictive Signatures
AAK1	T_Cell_Palmer	Prognostic and Predictive Signatures
TMC6	T_Cell_Palmer	Prognostic and Predictive Signatures
MLLT3	T_Cell_Palmer	Prognostic and Predictive Signatures
ANXA1	T_Cell_Palmer	Prognostic and Predictive Signatures
PCSK5	T_Cell_Palmer	Prognostic and Predictive Signatures
ADA	T_Cell_Palmer	Prognostic and Predictive Signatures
MEN1	T_Cell_Palmer	Prognostic and Predictive Signatures
PRKCQ	T_Cell_Palmer	Prognostic and Predictive Signatures
JAKMIP1	T_Cell_Palmer	Prognostic and Predictive Signatures
CAMK4	T_Cell_Palmer	Prognostic and Predictive Signatures
IL6ST	T_Cell_Palmer	Prognostic and Predictive Signatures
NELL2	T_Cell_Palmer	Prognostic and Predictive Signatures
FLT3LG	T_Cell_Palmer	Prognostic and Predictive Signatures
STAT4	T_Cell_Palmer	Prognostic and Predictive Signatures
LPAR6	T_Cell_Palmer	Prognostic and Predictive Signatures
PDE9A	T_Cell_Palmer	Prognostic and Predictive Signatures
PAG1	T_Cell_Palmer	Prognostic and Predictive Signatures
GFI1	T_Cell_Palmer	Prognostic and Predictive Signatures
RETREG1	T_Cell_Palmer	Prognostic and Predictive Signatures
RORA	T_Cell_Palmer	Prognostic and Predictive Signatures
GATA3	T_Cell_Palmer	Prognostic and Predictive Signatures
NPTXR	T_Cell_Palmer	Prognostic and Predictive Signatures
CDR2	T_Cell_Palmer	Prognostic and Predictive Signatures
CD96	T_Cell_Palmer	Prognostic and Predictive Signatures
LYAR	T_Cell_Palmer	Prognostic and Predictive Signatures
SYNE2	T_Cell_Palmer	Prognostic and Predictive Signatures
MORC2-AS1	T_Cell_Palmer	Prognostic and Predictive Signatures
UPP1	T_Cell_Palmer	Prognostic and Predictive Signatures
ATP1A1	T_Cell_Palmer	Prognostic and Predictive Signatures
SH2D1A	T_Cell_Palmer	Prognostic and Predictive Signatures
FHIT	T_Cell_Palmer	Prognostic and Predictive Signatures
LTBP4	T_Cell_Palmer	Prognostic and Predictive Signatures
RNF144A	T_Cell_Palmer	Prognostic and Predictive Signatures
RAB43	T_Cell_Palmer	Prognostic and Predictive Signatures
TNFSF8	T_Cell_Palmer	Prognostic and Predictive Signatures
LCK	T_Cell_Palmer	Prognostic and Predictive Signatures
CD5	T_Cell_Palmer	Prognostic and Predictive Signatures
DUSP16	T_Cell_Palmer	Prognostic and Predictive Signatures
BAG3	T_Cell_Palmer	Prognostic and Predictive Signatures
TESPA1	T_Cell_Palmer	Prognostic and Predictive Signatures
BIN2	T_Cell_Palmer	Prognostic and Predictive Signatures
GIPC1	T_Cell_Palmer	Prognostic and Predictive Signatures
RBMS1	T_Cell_Palmer	Prognostic and Predictive Signatures
ITPKB	T_Cell_Palmer	Prognostic and Predictive Signatures
LDHA	T_Cell_Palmer	Prognostic and Predictive Signatures
TRA	T_Cell_Palmer	Prognostic and Predictive Signatures
PKM	T_Cell_Palmer	Prognostic and Predictive Signatures
ID2	T_Cell_Palmer	Prognostic and Predictive Signatures
MAPKAPK5	T_Cell_Palmer	Prognostic and Predictive Signatures
ARL4C	T_Cell_Palmer	Prognostic and Predictive Signatures
LCP2	T_Cell_Palmer	Prognostic and Predictive Signatures
MATN2	T_Cell_Palmer	Prognostic and Predictive Signatures
CISH	T_Cell_Palmer	Prognostic and Predictive Signatures
CCL5	T_Cell_Palmer	Prognostic and Predictive Signatures
SATB1	T_Cell_Palmer	Prognostic and Predictive Signatures
DOCK9	T_Cell_Palmer	Prognostic and Predictive Signatures
TSEN54	T_Cell_Palmer	Prognostic and Predictive Signatures
ACVR2B	T_Cell_Palmer	Prognostic and Predictive Signatures
GZMK	T_Cell_Palmer	Prognostic and Predictive Signatures
AQP3	T_Cell_Palmer	Prognostic and Predictive Signatures
MAST4	T_Cell_Palmer	Prognostic and Predictive Signatures
DNASE1L3	T_Cell_Palmer	Prognostic and Predictive Signatures
HSPA1L	T_Cell_Palmer	Prognostic and Predictive Signatures
NOL4L	T_Cell_Palmer	Prognostic and Predictive Signatures
LIMA1	T_Cell_Palmer	Prognostic and Predictive Signatures
PCYT2	T_Cell_Palmer	Prognostic and Predictive Signatures
COA5	T_Cell_Palmer	Prognostic and Predictive Signatures
GBP2	T_Cell_Palmer	Prognostic and Predictive Signatures
CD3E	T_Cell_Palmer	Prognostic and Predictive Signatures
LINS1	T_Cell_Palmer	Prognostic and Predictive Signatures
CDC14A	T_Cell_Palmer	Prognostic and Predictive Signatures
CD247	T_Cell_Palmer	Prognostic and Predictive Signatures
TNIK	T_Cell_Palmer	Prognostic and Predictive Signatures
HOXB2	T_Cell_Palmer	Prognostic and Predictive Signatures
OLAH	T_Cell_Palmer	Prognostic and Predictive Signatures
SLC39A8	T_Cell_Palmer	Prognostic and Predictive Signatures
PTGER2	T_Cell_Palmer	Prognostic and Predictive Signatures
RGS10	T_Cell_Palmer	Prognostic and Predictive Signatures
FYN	T_Cell_Palmer	Prognostic and Predictive Signatures
ACTN1	T_Cell_Palmer	Prognostic and Predictive Signatures
FAM102A	T_Cell_Palmer	Prognostic and Predictive Signatures
LDHB	T_Cell_Palmer	Prognostic and Predictive Signatures
APOE	T_Cell_Palmer	Prognostic and Predictive Signatures
GBP1	T_Cell_Palmer	Prognostic and Predictive Signatures
ITM2A	T_Cell_Palmer	Prognostic and Predictive Signatures
CDC25B	T_Cell_Palmer	Prognostic and Predictive Signatures
MYBL1	T_Cell_Palmer	Prognostic and Predictive Signatures
PRKCA	T_Cell_Palmer	Prognostic and Predictive Signatures
TACC3	T_Cell_Palmer	Prognostic and Predictive Signatures
DNAJC17	T_Cell_Palmer	Prognostic and Predictive Signatures
MAP7D1	T_Cell_Palmer	Prognostic and Predictive Signatures
MAN1C1	T_Cell_Palmer	Prognostic and Predictive Signatures
VIPR1	T_Cell_Palmer	Prognostic and Predictive Signatures
SYT1	T_Cell_Palmer	Prognostic and Predictive Signatures
DNAJB1	T_Cell_Palmer	Prognostic and Predictive Signatures
RUNX2	T_Cell_Palmer	Prognostic and Predictive Signatures
TIAM1	T_Cell_Palmer	Prognostic and Predictive Signatures
RASGRP1	T_Cell_Palmer	Prognostic and Predictive Signatures
PRKCI	T_Cell_Palmer	Prognostic and Predictive Signatures
PXN	T_Cell_Palmer	Prognostic and Predictive Signatures
PXDN	T_Cell_Palmer	Prognostic and Predictive Signatures
WWP1	T_Cell_Palmer	Prognostic and Predictive Signatures
PDE4D	T_Cell_Palmer	Prognostic and Predictive Signatures
KLRB1	T_Cell_Palmer	Prognostic and Predictive Signatures
SEMA4D	T_Cell_Palmer	Prognostic and Predictive Signatures
GPSM3	T_Cell_Palmer	Prognostic and Predictive Signatures
PLAAT4	T_Cell_Palmer	Prognostic and Predictive Signatures
KLRG1	T_Cell_Palmer	Prognostic and Predictive Signatures
SLC35D2	T_Cell_Palmer	Prognostic and Predictive Signatures
LPAR2	T_Cell_Palmer	Prognostic and Predictive Signatures
S100A10	T_Cell_Palmer	Prognostic and Predictive Signatures
TOB1	T_Cell_Palmer	Prognostic and Predictive Signatures
NPDC1	T_Cell_Palmer	Prognostic and Predictive Signatures
NSG1	T_Cell_Palmer	Prognostic and Predictive Signatures
GABARAPL1	T_Cell_Palmer	Prognostic and Predictive Signatures
TSPAN14	T_Cell_Palmer	Prognostic and Predictive Signatures
SORL1	T_Cell_Palmer	Prognostic and Predictive Signatures
MPP7	T_Cell_Palmer	Prognostic and Predictive Signatures
CHAF1B	T_Cell_Palmer	Prognostic and Predictive Signatures
GIMAP4	T_Cell_Palmer	Prognostic and Predictive Signatures
GIMAP2	T_Cell_Palmer	Prognostic and Predictive Signatures
SOCS3	T_Cell_Palmer	Prognostic and Predictive Signatures
IL6R	T_Cell_Palmer	Prognostic and Predictive Signatures
LPIN2	T_Cell_Palmer	Prognostic and Predictive Signatures
IL18R1	T_Cell_Palmer	Prognostic and Predictive Signatures
PIK3IP1	T_Cell_Palmer	Prognostic and Predictive Signatures
PIM1	T_Cell_Palmer	Prognostic and Predictive Signatures
LONP1	T_Cell_Palmer	Prognostic and Predictive Signatures
IFITM1	T_Cell_Palmer	Prognostic and Predictive Signatures
PIK3R1	T_Cell_Palmer	Prognostic and Predictive Signatures
NAP1L5	T_Cell_Palmer	Prognostic and Predictive Signatures
SLCO3A1	T_Cell_Palmer	Prognostic and Predictive Signatures
SELPLG	T_Cell_Palmer	Prognostic and Predictive Signatures
TNFAIP3	T_Cell_Palmer	Prognostic and Predictive Signatures
OPTN	T_Cell_Palmer	Prognostic and Predictive Signatures
RNF213	T_Cell_Palmer	Prognostic and Predictive Signatures
S100A8	T_Cell_Palmer	Prognostic and Predictive Signatures
DUSP2	T_Cell_Palmer	Prognostic and Predictive Signatures
SPOCK2	T_Cell_Palmer	Prognostic and Predictive Signatures
CTSW	T_Cell_Palmer	Prognostic and Predictive Signatures
ARID3A	T_Cell_Palmer	Prognostic and Predictive Signatures
NBPF14	T_Cell_Palmer	Prognostic and Predictive Signatures
CEP41	T_Cell_Palmer	Prognostic and Predictive Signatures
LRIG1	T_Cell_Palmer	Prognostic and Predictive Signatures
ITM2A	T_Cells_Bindea	Prognostic and Predictive Signatures
LCK	T_Cells_Bindea	Prognostic and Predictive Signatures
CD3E	T_Cells_Bindea	Prognostic and Predictive Signatures
SKAP1	T_Cells_Bindea	Prognostic and Predictive Signatures
CD2	T_Cells_Bindea	Prognostic and Predictive Signatures
CD28	T_Cells_Bindea	Prognostic and Predictive Signatures
CD96	T_Cells_Bindea	Prognostic and Predictive Signatures
CD3G	T_Cells_Bindea	Prognostic and Predictive Signatures
TRAC	T_Cells_Bindea	Prognostic and Predictive Signatures
PRKCQ	T_Cells_Bindea	Prognostic and Predictive Signatures
SH2D1A	T_Cells_Bindea	Prognostic and Predictive Signatures
TRBC1	T_Cells_Bindea	Prognostic and Predictive Signatures
NCALD	T_Cells_Bindea	Prognostic and Predictive Signatures
CD3D	T_Cells_Bindea	Prognostic and Predictive Signatures
YME1L1	T_Cells_Bindea	Prognostic and Predictive Signatures
CD6	T_Cells_Bindea	Prognostic and Predictive Signatures
TRAT1	T_Cells_Bindea	Prognostic and Predictive Signatures
BCL11B	T_Cells_Bindea	Prognostic and Predictive Signatures
ACAP1	T_Cell_cluster_Iglesia	Prognostic and Predictive Signatures
BTLA	T_Cell_cluster_Iglesia	Prognostic and Predictive Signatures
C16orf54	T_Cell_cluster_Iglesia	Prognostic and Predictive Signatures
CCL5	T_Cell_cluster_Iglesia	Prognostic and Predictive Signatures
CCR2	T_Cell_cluster_Iglesia	Prognostic and Predictive Signatures
CD2	T_Cell_cluster_Iglesia	Prognostic and Predictive Signatures
CD247	T_Cell_cluster_Iglesia	Prognostic and Predictive Signatures
CD27	T_Cell_cluster_Iglesia	Prognostic and Predictive Signatures
CD38	T_Cell_cluster_Iglesia	Prognostic and Predictive Signatures
CD3D	T_Cell_cluster_Iglesia	Prognostic and Predictive Signatures
CD3E	T_Cell_cluster_Iglesia	Prognostic and Predictive Signatures
CD3G	T_Cell_cluster_Iglesia	Prognostic and Predictive Signatures
CD40LG	T_Cell_cluster_Iglesia	Prognostic and Predictive Signatures
CD48	T_Cell_cluster_Iglesia	Prognostic and Predictive Signatures
CD5	T_Cell_cluster_Iglesia	Prognostic and Predictive Signatures
CD52	T_Cell_cluster_Iglesia	Prognostic and Predictive Signatures
CD6	T_Cell_cluster_Iglesia	Prognostic and Predictive Signatures
CD7	T_Cell_cluster_Iglesia	Prognostic and Predictive Signatures
CD8A	T_Cell_cluster_Iglesia	Prognostic and Predictive Signatures
CD96	T_Cell_cluster_Iglesia	Prognostic and Predictive Signatures
CORO1A	T_Cell_cluster_Iglesia	Prognostic and Predictive Signatures
CRTAM	T_Cell_cluster_Iglesia	Prognostic and Predictive Signatures
CST7	T_Cell_cluster_Iglesia	Prognostic and Predictive Signatures
CTLA4	T_Cell_cluster_Iglesia	Prognostic and Predictive Signatures
CXCL9	T_Cell_cluster_Iglesia	Prognostic and Predictive Signatures
CXCR3	T_Cell_cluster_Iglesia	Prognostic and Predictive Signatures
CXCR6	T_Cell_cluster_Iglesia	Prognostic and Predictive Signatures
DCANP1	T_Cell_cluster_Iglesia	Prognostic and Predictive Signatures
EOMES	T_Cell_cluster_Iglesia	Prognostic and Predictive Signatures
FASLG	T_Cell_cluster_Iglesia	Prognostic and Predictive Signatures
FCRL3	T_Cell_cluster_Iglesia	Prognostic and Predictive Signatures
GFI1	T_Cell_cluster_Iglesia	Prognostic and Predictive Signatures
GPR171	T_Cell_cluster_Iglesia	Prognostic and Predictive Signatures
GPR174	T_Cell_cluster_Iglesia	Prognostic and Predictive Signatures
GVINP1	T_Cell_cluster_Iglesia	Prognostic and Predictive Signatures
GZMA	T_Cell_cluster_Iglesia	Prognostic and Predictive Signatures
GZMK	T_Cell_cluster_Iglesia	Prognostic and Predictive Signatures
GZMM	T_Cell_cluster_Iglesia	Prognostic and Predictive Signatures
ICOS	T_Cell_cluster_Iglesia	Prognostic and Predictive Signatures
IL2RG	T_Cell_cluster_Iglesia	Prognostic and Predictive Signatures
IRF4	T_Cell_cluster_Iglesia	Prognostic and Predictive Signatures
ITK	T_Cell_cluster_Iglesia	Prognostic and Predictive Signatures
JAK3	T_Cell_cluster_Iglesia	Prognostic and Predictive Signatures
JAML	T_Cell_cluster_Iglesia	Prognostic and Predictive Signatures
KLRK1	T_Cell_cluster_Iglesia	Prognostic and Predictive Signatures
LAT	T_Cell_cluster_Iglesia	Prognostic and Predictive Signatures
LAX1	T_Cell_cluster_Iglesia	Prognostic and Predictive Signatures
LCK	T_Cell_cluster_Iglesia	Prognostic and Predictive Signatures
LINC00426	T_Cell_cluster_Iglesia	Prognostic and Predictive Signatures
LTA	T_Cell_cluster_Iglesia	Prognostic and Predictive Signatures
LY9	T_Cell_cluster_Iglesia	Prognostic and Predictive Signatures
MAP4K1	T_Cell_cluster_Iglesia	Prognostic and Predictive Signatures
NKG7	T_Cell_cluster_Iglesia	Prognostic and Predictive Signatures
PDCD1	T_Cell_cluster_Iglesia	Prognostic and Predictive Signatures
PLA2G2D	T_Cell_cluster_Iglesia	Prognostic and Predictive Signatures
PRF1	T_Cell_cluster_Iglesia	Prognostic and Predictive Signatures
PRKCB	T_Cell_cluster_Iglesia	Prognostic and Predictive Signatures
PSTPIP1	T_Cell_cluster_Iglesia	Prognostic and Predictive Signatures
PTPN7	T_Cell_cluster_Iglesia	Prognostic and Predictive Signatures
PTPRCAP	T_Cell_cluster_Iglesia	Prognostic and Predictive Signatures
PYHIN1	T_Cell_cluster_Iglesia	Prognostic and Predictive Signatures
S1PR4	T_Cell_cluster_Iglesia	Prognostic and Predictive Signatures
SAMD3	T_Cell_cluster_Iglesia	Prognostic and Predictive Signatures
SCML4	T_Cell_cluster_Iglesia	Prognostic and Predictive Signatures
SH2D1A	T_Cell_cluster_Iglesia	Prognostic and Predictive Signatures
SIRPG	T_Cell_cluster_Iglesia	Prognostic and Predictive Signatures
SIT1	T_Cell_cluster_Iglesia	Prognostic and Predictive Signatures
SLA2	T_Cell_cluster_Iglesia	Prognostic and Predictive Signatures
SLAMF1	T_Cell_cluster_Iglesia	Prognostic and Predictive Signatures
SLAMF6	T_Cell_cluster_Iglesia	Prognostic and Predictive Signatures
SLAMF7	T_Cell_cluster_Iglesia	Prognostic and Predictive Signatures
SP140	T_Cell_cluster_Iglesia	Prognostic and Predictive Signatures
SPOCK2	T_Cell_cluster_Iglesia	Prognostic and Predictive Signatures
TBC1D10C	T_Cell_cluster_Iglesia	Prognostic and Predictive Signatures
TBX21	T_Cell_cluster_Iglesia	Prognostic and Predictive Signatures
TESPA1	T_Cell_cluster_Iglesia	Prognostic and Predictive Signatures
THEMIS	T_Cell_cluster_Iglesia	Prognostic and Predictive Signatures
TIFAB	T_Cell_cluster_Iglesia	Prognostic and Predictive Signatures
TIGIT	T_Cell_cluster_Iglesia	Prognostic and Predictive Signatures
TRAT1	T_Cell_cluster_Iglesia	Prognostic and Predictive Signatures
UBASH3A	T_Cell_cluster_Iglesia	Prognostic and Predictive Signatures
ZAP70	T_Cell_cluster_Iglesia	Prognostic and Predictive Signatures
ZNF831	T_Cell_cluster_Iglesia	Prognostic and Predictive Signatures
CD8B	CD8_Palmer	Prognostic and Predictive Signatures
CD8A	CD8_Palmer	Prognostic and Predictive Signatures
CCL5	CD8_Palmer	Prognostic and Predictive Signatures
KLRK1	CD8_Palmer	Prognostic and Predictive Signatures
TSPAN32	CD8_Palmer	Prognostic and Predictive Signatures
KLRG1	CD8_Palmer	Prognostic and Predictive Signatures
S100B	CD8_Palmer	Prognostic and Predictive Signatures
KLRC1	CD8_Palmer	Prognostic and Predictive Signatures
ADRB2	CD8_Palmer	Prognostic and Predictive Signatures
CST7	CD8_Palmer	Prognostic and Predictive Signatures
GZMH	CD8_Palmer	Prognostic and Predictive Signatures
C1orf21	CD8_Palmer	Prognostic and Predictive Signatures
IL2RB	CD8_Palmer	Prognostic and Predictive Signatures
DUSP2	CD8_Palmer	Prognostic and Predictive Signatures
ADGRG1	CD8_Palmer	Prognostic and Predictive Signatures
CCL4L1	CD8_Palmer	Prognostic and Predictive Signatures
ZBTB16	CD8_Palmer	Prognostic and Predictive Signatures
FCGBP	CD8_Palmer	Prognostic and Predictive Signatures
TBX21	CD8_Palmer	Prognostic and Predictive Signatures
PRF1	CD8_Palmer	Prognostic and Predictive Signatures
GNLY	CD8_Palmer	Prognostic and Predictive Signatures
ACAP1	CD8_cluster_Iglesia	Prognostic and Predictive Signatures
BTLA	CD8_cluster_Iglesia	Prognostic and Predictive Signatures
C16orf54	CD8_cluster_Iglesia	Prognostic and Predictive Signatures
CCL5	CD8_cluster_Iglesia	Prognostic and Predictive Signatures
CD2	CD8_cluster_Iglesia	Prognostic and Predictive Signatures
CD247	CD8_cluster_Iglesia	Prognostic and Predictive Signatures
CD27	CD8_cluster_Iglesia	Prognostic and Predictive Signatures
CD3D	CD8_cluster_Iglesia	Prognostic and Predictive Signatures
CD3E	CD8_cluster_Iglesia	Prognostic and Predictive Signatures
CD3G	CD8_cluster_Iglesia	Prognostic and Predictive Signatures
CD48	CD8_cluster_Iglesia	Prognostic and Predictive Signatures
CD5	CD8_cluster_Iglesia	Prognostic and Predictive Signatures
CD6	CD8_cluster_Iglesia	Prognostic and Predictive Signatures
CD8A	CD8_cluster_Iglesia	Prognostic and Predictive Signatures
CD96	CD8_cluster_Iglesia	Prognostic and Predictive Signatures
CXCR3	CD8_cluster_Iglesia	Prognostic and Predictive Signatures
CXCR6	CD8_cluster_Iglesia	Prognostic and Predictive Signatures
GPR171	CD8_cluster_Iglesia	Prognostic and Predictive Signatures
GZMA	CD8_cluster_Iglesia	Prognostic and Predictive Signatures
GZMK	CD8_cluster_Iglesia	Prognostic and Predictive Signatures
IL2RG	CD8_cluster_Iglesia	Prognostic and Predictive Signatures
ITK	CD8_cluster_Iglesia	Prognostic and Predictive Signatures
KLRK1	CD8_cluster_Iglesia	Prognostic and Predictive Signatures
LCK	CD8_cluster_Iglesia	Prognostic and Predictive Signatures
LY9	CD8_cluster_Iglesia	Prognostic and Predictive Signatures
NKG7	CD8_cluster_Iglesia	Prognostic and Predictive Signatures
PRF1	CD8_cluster_Iglesia	Prognostic and Predictive Signatures
PRKCB	CD8_cluster_Iglesia	Prognostic and Predictive Signatures
PTPN7	CD8_cluster_Iglesia	Prognostic and Predictive Signatures
PTPRCAP	CD8_cluster_Iglesia	Prognostic and Predictive Signatures
PYHIN1	CD8_cluster_Iglesia	Prognostic and Predictive Signatures
S1PR4	CD8_cluster_Iglesia	Prognostic and Predictive Signatures
SAMD3	CD8_cluster_Iglesia	Prognostic and Predictive Signatures
SCML4	CD8_cluster_Iglesia	Prognostic and Predictive Signatures
SH2D1A	CD8_cluster_Iglesia	Prognostic and Predictive Signatures
SIRPG	CD8_cluster_Iglesia	Prognostic and Predictive Signatures
SIT1	CD8_cluster_Iglesia	Prognostic and Predictive Signatures
SLA2	CD8_cluster_Iglesia	Prognostic and Predictive Signatures
SLAMF1	CD8_cluster_Iglesia	Prognostic and Predictive Signatures
SLAMF6	CD8_cluster_Iglesia	Prognostic and Predictive Signatures
TBC1D10C	CD8_cluster_Iglesia	Prognostic and Predictive Signatures
TBX21	CD8_cluster_Iglesia	Prognostic and Predictive Signatures
TIGIT	CD8_cluster_Iglesia	Prognostic and Predictive Signatures
TRAT1	CD8_cluster_Iglesia	Prognostic and Predictive Signatures
UBASH3A	CD8_cluster_Iglesia	Prognostic and Predictive Signatures
ZAP70	CD8_cluster_Iglesia	Prognostic and Predictive Signatures
ZNF831	CD8_cluster_Iglesia	Prognostic and Predictive Signatures
CCL5	LCK_Rody	Prognostic and Predictive Signatures
IL2RG	LCK_Rody	Prognostic and Predictive Signatures
CD48	LCK_Rody	Prognostic and Predictive Signatures
SELL	LCK_Rody	Prognostic and Predictive Signatures
LCK	LCK_Rody	Prognostic and Predictive Signatures
GZMA	LCK_Rody	Prognostic and Predictive Signatures
IL7R	LCK_Rody	Prognostic and Predictive Signatures
KLRK1	LCK_Rody	Prognostic and Predictive Signatures
CD2	LCK_Rody	Prognostic and Predictive Signatures
STAT4	LCK_Rody	Prognostic and Predictive Signatures
CD27	LCK_Rody	Prognostic and Predictive Signatures
SLAMF1	LCK_Rody	Prognostic and Predictive Signatures
CCR7	LCK_Rody	Prognostic and Predictive Signatures
GZMK	LCK_Rody	Prognostic and Predictive Signatures
CCR2	LCK_Rody	Prognostic and Predictive Signatures
LTB	LCK_Rody	Prognostic and Predictive Signatures
TRA	LCK_Rody	Prognostic and Predictive Signatures
PRKCB	LCK_Rody	Prognostic and Predictive Signatures
CD247	LCK_Rody	Prognostic and Predictive Signatures
SH2D1A	LCK_Rody	Prognostic and Predictive Signatures
TRBC1	LCK_Rody	Prognostic and Predictive Signatures
ITK	LCK_Rody	Prognostic and Predictive Signatures
CD3D	LCK_Rody	Prognostic and Predictive Signatures
GIMAP5	LCK_Rody	Prognostic and Predictive Signatures
PLAC8	LCK_Rody	Prognostic and Predictive Signatures
LGALS13	LCK_Rody	Prognostic and Predictive Signatures
GIMAP4	LCK_Rody	Prognostic and Predictive Signatures
IER3	LCK_Rody	Prognostic and Predictive Signatures
SRGN	LCK_Rody	Prognostic and Predictive Signatures
HCLS1	LCK_Rody	Prognostic and Predictive Signatures
INPP5D	LCK_Rody	Prognostic and Predictive Signatures
CD53	LCK_Rody	Prognostic and Predictive Signatures
SLA	LCK_Rody	Prognostic and Predictive Signatures
SEPSECS	LCK_Rody	Prognostic and Predictive Signatures
PIK3CD	LCK_Rody	Prognostic and Predictive Signatures
IRF8	LCK_Rody	Prognostic and Predictive Signatures
GMFG	LCK_Rody	Prognostic and Predictive Signatures
FGL2	LCK_Rody	Prognostic and Predictive Signatures
IL10RA	LCK_Rody	Prognostic and Predictive Signatures
SASH3	LCK_Rody	Prognostic and Predictive Signatures
CSF2RB	LCK_Rody	Prognostic and Predictive Signatures
LCP2	LCK_Rody	Prognostic and Predictive Signatures
CORO1A	LCK_Rody	Prognostic and Predictive Signatures
NCKAP1L	LCK_Rody	Prognostic and Predictive Signatures
SELPLG	LCK_Rody	Prognostic and Predictive Signatures
EVI2B	LCK_Rody	Prognostic and Predictive Signatures
PTPRC	LCK_Rody	Prognostic and Predictive Signatures
RAC2	LCK_Rody	Prognostic and Predictive Signatures
LPXN	LCK_Rody	Prognostic and Predictive Signatures
ARHGAP15	LCK_Rody	Prognostic and Predictive Signatures
SAMSN1	LCK_Rody	Prognostic and Predictive Signatures
ARHGAP25	LCK_Rody	Prognostic and Predictive Signatures
LAPTM5	TNBC_T-Cell_Rody	Prognostic and Predictive Signatures
CD53	TNBC_T-Cell_Rody	Prognostic and Predictive Signatures
CD48	TNBC_T-Cell_Rody	Prognostic and Predictive Signatures
SELL	TNBC_T-Cell_Rody	Prognostic and Predictive Signatures
CD52	TNBC_T-Cell_Rody	Prognostic and Predictive Signatures
LCK	TNBC_T-Cell_Rody	Prognostic and Predictive Signatures
IL10RA	TNBC_T-Cell_Rody	Prognostic and Predictive Signatures
CD2	TNBC_T-Cell_Rody	Prognostic and Predictive Signatures
CD27	TNBC_T-Cell_Rody	Prognostic and Predictive Signatures
GZMK	TNBC_T-Cell_Rody	Prognostic and Predictive Signatures
CORO1A	TNBC_T-Cell_Rody	Prognostic and Predictive Signatures
TRAC	TNBC_T-Cell_Rody	Prognostic and Predictive Signatures
TRBC1	TNBC_T-Cell_Rody	Prognostic and Predictive Signatures
ITK	TNBC_T-Cell_Rody	Prognostic and Predictive Signatures
EVI2B	TNBC_T-Cell_Rody	Prognostic and Predictive Signatures
YME1L1	TNBC_T-Cell_Rody	Prognostic and Predictive Signatures
PTPRC	TNBC_T-Cell_Rody	Prognostic and Predictive Signatures
CD3D	TNBC_T-Cell_Rody	Prognostic and Predictive Signatures
PLAC8	TNBC_T-Cell_Rody	Prognostic and Predictive Signatures
SAMSN1	TNBC_T-Cell_Rody	Prognostic and Predictive Signatures
ARHGAP25	TNBC_T-Cell_Rody	Prognostic and Predictive Signatures
NBL1	CD8_TRM_Signature_Up	Prognostic and Predictive Signatures
RP4-728D4.2	CD8_TRM_Signature_Up	Prognostic and Predictive Signatures
LMO4	CD8_TRM_Signature_Up	Prognostic and Predictive Signatures
VCAM1	CD8_TRM_Signature_Up	Prognostic and Predictive Signatures
MLLT11	CD8_TRM_Signature_Up	Prognostic and Predictive Signatures
SEMA4A	CD8_TRM_Signature_Up	Prognostic and Predictive Signatures
CD244	CD8_TRM_Signature_Up	Prognostic and Predictive Signatures
FASLG	CD8_TRM_Signature_Up	Prognostic and Predictive Signatures
TNFSF4	CD8_TRM_Signature_Up	Prognostic and Predictive Signatures
C1orf21	CD8_TRM_Signature_Up	Prognostic and Predictive Signatures
RGS13	CD8_TRM_Signature_Up	Prognostic and Predictive Signatures
NR5A2	CD8_TRM_Signature_Up	Prognostic and Predictive Signatures
SNAP47	CD8_TRM_Signature_Up	Prognostic and Predictive Signatures
GALNT2	CD8_TRM_Signature_Up	Prognostic and Predictive Signatures
LYST	CD8_TRM_Signature_Up	Prognostic and Predictive Signatures
AC092580.4	CD8_TRM_Signature_Up	Prognostic and Predictive Signatures
FAM49A	CD8_TRM_Signature_Up	Prognostic and Predictive Signatures
FAM179A	CD8_TRM_Signature_Up	Prognostic and Predictive Signatures
CRIM1	CD8_TRM_Signature_Up	Prognostic and Predictive Signatures
GNLY	CD8_TRM_Signature_Up	Prognostic and Predictive Signatures
CD8A	CD8_TRM_Signature_Up	Prognostic and Predictive Signatures
CD8B	CD8_TRM_Signature_Up	Prognostic and Predictive Signatures
GPAT2	CD8_TRM_Signature_Up	Prognostic and Predictive Signatures
NR4A2	CD8_TRM_Signature_Up	Prognostic and Predictive Signatures
GPD2	CD8_TRM_Signature_Up	Prognostic and Predictive Signatures
CERS6	CD8_TRM_Signature_Up	Prognostic and Predictive Signatures
TTN	CD8_TRM_Signature_Up	Prognostic and Predictive Signatures
CCDC141	CD8_TRM_Signature_Up	Prognostic and Predictive Signatures
ITM2C	CD8_TRM_Signature_Up	Prognostic and Predictive Signatures
UBE2F	CD8_TRM_Signature_Up	Prognostic and Predictive Signatures
PDCD1	CD8_TRM_Signature_Up	Prognostic and Predictive Signatures
SRGAP3	CD8_TRM_Signature_Up	Prognostic and Predictive Signatures
RP11-222K16.2	CD8_TRM_Signature_Up	Prognostic and Predictive Signatures
EOMES	CD8_TRM_Signature_Up	Prognostic and Predictive Signatures
CMC1	CD8_TRM_Signature_Up	Prognostic and Predictive Signatures
CCR1	CD8_TRM_Signature_Up	Prognostic and Predictive Signatures
CCR5	CD8_TRM_Signature_Up	Prognostic and Predictive Signatures
ABHD6	CD8_TRM_Signature_Up	Prognostic and Predictive Signatures
DZIP3	CD8_TRM_Signature_Up	Prognostic and Predictive Signatures
CD200R1	CD8_TRM_Signature_Up	Prognostic and Predictive Signatures
GTPBP8	CD8_TRM_Signature_Up	Prognostic and Predictive Signatures
HEG1	CD8_TRM_Signature_Up	Prognostic and Predictive Signatures
GOLIM4	CD8_TRM_Signature_Up	Prognostic and Predictive Signatures
GNB4	CD8_TRM_Signature_Up	Prognostic and Predictive Signatures
CD38	CD8_TRM_Signature_Up	Prognostic and Predictive Signatures
DTHD1	CD8_TRM_Signature_Up	Prognostic and Predictive Signatures
STAP1	CD8_TRM_Signature_Up	Prognostic and Predictive Signatures
TNIP3	CD8_TRM_Signature_Up	Prognostic and Predictive Signatures
TMEM155	CD8_TRM_Signature_Up	Prognostic and Predictive Signatures
ITGA1	CD8_TRM_Signature_Up	Prognostic and Predictive Signatures
ITGA2	CD8_TRM_Signature_Up	Prognostic and Predictive Signatures
GZMA	CD8_TRM_Signature_Up	Prognostic and Predictive Signatures
PLPP1	CD8_TRM_Signature_Up	Prognostic and Predictive Signatures
RASA1	CD8_TRM_Signature_Up	Prognostic and Predictive Signatures
PDLIM4	CD8_TRM_Signature_Up	Prognostic and Predictive Signatures
TIMD4	CD8_TRM_Signature_Up	Prognostic and Predictive Signatures
HAVCR2	CD8_TRM_Signature_Up	Prognostic and Predictive Signatures
DBN1	CD8_TRM_Signature_Up	Prognostic and Predictive Signatures
GFOD1	CD8_TRM_Signature_Up	Prognostic and Predictive Signatures
AIF1	CD8_TRM_Signature_Up	Prognostic and Predictive Signatures
HLA-DRA	CD8_TRM_Signature_Up	Prognostic and Predictive Signatures
HLA-DRB5	CD8_TRM_Signature_Up	Prognostic and Predictive Signatures
HLA-DRB1	CD8_TRM_Signature_Up	Prognostic and Predictive Signatures
HLA-DQA1	CD8_TRM_Signature_Up	Prognostic and Predictive Signatures
HLA-DQB1	CD8_TRM_Signature_Up	Prognostic and Predictive Signatures
SOBP	CD8_TRM_Signature_Up	Prognostic and Predictive Signatures
VNN2	CD8_TRM_Signature_Up	Prognostic and Predictive Signatures
CHST12	CD8_TRM_Signature_Up	Prognostic and Predictive Signatures
ETV1	CD8_TRM_Signature_Up	Prognostic and Predictive Signatures
CHN2	CD8_TRM_Signature_Up	Prognostic and Predictive Signatures
WIPF3	CD8_TRM_Signature_Up	Prognostic and Predictive Signatures
TRGV9	CD8_TRM_Signature_Up	Prognostic and Predictive Signatures
TRG-AS1	CD8_TRM_Signature_Up	Prognostic and Predictive Signatures
LIMK1	CD8_TRM_Signature_Up	Prognostic and Predictive Signatures
PON3	CD8_TRM_Signature_Up	Prognostic and Predictive Signatures
PON2	CD8_TRM_Signature_Up	Prognostic and Predictive Signatures
LRRN3	CD8_TRM_Signature_Up	Prognostic and Predictive Signatures
FAM3C	CD8_TRM_Signature_Up	Prognostic and Predictive Signatures
ADAM28	CD8_TRM_Signature_Up	Prognostic and Predictive Signatures
TOX	CD8_TRM_Signature_Up	Prognostic and Predictive Signatures
ASPH	CD8_TRM_Signature_Up	Prognostic and Predictive Signatures
MSC	CD8_TRM_Signature_Up	Prognostic and Predictive Signatures
FABP5	CD8_TRM_Signature_Up	Prognostic and Predictive Signatures
MTSS1	CD8_TRM_Signature_Up	Prognostic and Predictive Signatures
PIP5K1B	CD8_TRM_Signature_Up	Prognostic and Predictive Signatures
RP11-305L7.1	CD8_TRM_Signature_Up	Prognostic and Predictive Signatures
RP11-305L7.3	CD8_TRM_Signature_Up	Prognostic and Predictive Signatures
SLC2A8	CD8_TRM_Signature_Up	Prognostic and Predictive Signatures
RP11-492E3.2	CD8_TRM_Signature_Up	Prognostic and Predictive Signatures
SLC2A6	CD8_TRM_Signature_Up	Prognostic and Predictive Signatures
DBH-AS1	CD8_TRM_Signature_Up	Prognostic and Predictive Signatures
CLIC3	CD8_TRM_Signature_Up	Prognostic and Predictive Signatures
PNPLA7	CD8_TRM_Signature_Up	Prognostic and Predictive Signatures
PRR5L	CD8_TRM_Signature_Up	Prognostic and Predictive Signatures
PLA2G16	CD8_TRM_Signature_Up	Prognostic and Predictive Signatures
CTSW	CD8_TRM_Signature_Up	Prognostic and Predictive Signatures
TPCN2	CD8_TRM_Signature_Up	Prognostic and Predictive Signatures
MYO7A	CD8_TRM_Signature_Up	Prognostic and Predictive Signatures
PRSS23	CD8_TRM_Signature_Up	Prognostic and Predictive Signatures
DIXDC1	CD8_TRM_Signature_Up	Prognostic and Predictive Signatures
FXYD2	CD8_TRM_Signature_Up	Prognostic and Predictive Signatures
CRTAM	CD8_TRM_Signature_Up	Prognostic and Predictive Signatures
BARX2	CD8_TRM_Signature_Up	Prognostic and Predictive Signatures
NEBL	CD8_TRM_Signature_Up	Prognostic and Predictive Signatures
SPAG6	CD8_TRM_Signature_Up	Prognostic and Predictive Signatures
PRF1	CD8_TRM_Signature_Up	Prognostic and Predictive Signatures
ENTPD1	CD8_TRM_Signature_Up	Prognostic and Predictive Signatures
PIK3AP1	CD8_TRM_Signature_Up	Prognostic and Predictive Signatures
AFAP1L2	CD8_TRM_Signature_Up	Prognostic and Predictive Signatures
CD9	CD8_TRM_Signature_Up	Prognostic and Predictive Signatures
LPAR5	CD8_TRM_Signature_Up	Prognostic and Predictive Signatures
PTMS	CD8_TRM_Signature_Up	Prognostic and Predictive Signatures
LAG3	CD8_TRM_Signature_Up	Prognostic and Predictive Signatures
CLECL1	CD8_TRM_Signature_Up	Prognostic and Predictive Signatures
CLEC2B	CD8_TRM_Signature_Up	Prognostic and Predictive Signatures
KLRD1	CD8_TRM_Signature_Up	Prognostic and Predictive Signatures
RP11-277P12.20	CD8_TRM_Signature_Up	Prognostic and Predictive Signatures
KLRK1	CD8_TRM_Signature_Up	Prognostic and Predictive Signatures
KLRC4	CD8_TRM_Signature_Up	Prognostic and Predictive Signatures
KLRC2	CD8_TRM_Signature_Up	Prognostic and Predictive Signatures
KLRC1	CD8_TRM_Signature_Up	Prognostic and Predictive Signatures
RP11-291B21.2	CD8_TRM_Signature_Up	Prognostic and Predictive Signatures
NELL2	CD8_TRM_Signature_Up	Prognostic and Predictive Signatures
KRT86	CD8_TRM_Signature_Up	Prognostic and Predictive Signatures
KRT81	CD8_TRM_Signature_Up	Prognostic and Predictive Signatures
ITGB7	CD8_TRM_Signature_Up	Prognostic and Predictive Signatures
CD63	CD8_TRM_Signature_Up	Prognostic and Predictive Signatures
IFNG	CD8_TRM_Signature_Up	Prognostic and Predictive Signatures
TMTC2	CD8_TRM_Signature_Up	Prognostic and Predictive Signatures
HVCN1	CD8_TRM_Signature_Up	Prognostic and Predictive Signatures
KATNAL1	CD8_TRM_Signature_Up	Prognostic and Predictive Signatures
SERP2	CD8_TRM_Signature_Up	Prognostic and Predictive Signatures
TSC22D1	CD8_TRM_Signature_Up	Prognostic and Predictive Signatures
SPRY2	CD8_TRM_Signature_Up	Prognostic and Predictive Signatures
KDELC1	CD8_TRM_Signature_Up	Prognostic and Predictive Signatures
GZMH	CD8_TRM_Signature_Up	Prognostic and Predictive Signatures
GZMB	CD8_TRM_Signature_Up	Prognostic and Predictive Signatures
AKAP5	CD8_TRM_Signature_Up	Prognostic and Predictive Signatures
FUT8	CD8_TRM_Signature_Up	Prognostic and Predictive Signatures
DPF3	CD8_TRM_Signature_Up	Prognostic and Predictive Signatures
ATP8B4	CD8_TRM_Signature_Up	Prognostic and Predictive Signatures
DAPK2	CD8_TRM_Signature_Up	Prognostic and Predictive Signatures
PIF1	CD8_TRM_Signature_Up	Prognostic and Predictive Signatures
SEMA7A	CD8_TRM_Signature_Up	Prognostic and Predictive Signatures
MIR9-3HG	CD8_TRM_Signature_Up	Prognostic and Predictive Signatures
MCTP2	CD8_TRM_Signature_Up	Prognostic and Predictive Signatures
LRRC28	CD8_TRM_Signature_Up	Prognostic and Predictive Signatures
GTF3C1	CD8_TRM_Signature_Up	Prognostic and Predictive Signatures
NOD2	CD8_TRM_Signature_Up	Prognostic and Predictive Signatures
CPNE2	CD8_TRM_Signature_Up	Prognostic and Predictive Signatures
ADGRG5	CD8_TRM_Signature_Up	Prognostic and Predictive Signatures
ADGRG1	CD8_TRM_Signature_Up	Prognostic and Predictive Signatures
GSG2	CD8_TRM_Signature_Up	Prognostic and Predictive Signatures
RASD1	CD8_TRM_Signature_Up	Prognostic and Predictive Signatures
AC069363.1	CD8_TRM_Signature_Up	Prognostic and Predictive Signatures
CCL3	CD8_TRM_Signature_Up	Prognostic and Predictive Signatures
CCL4	CD8_TRM_Signature_Up	Prognostic and Predictive Signatures
CCL3L3	CD8_TRM_Signature_Up	Prognostic and Predictive Signatures
CCL4L2	CD8_TRM_Signature_Up	Prognostic and Predictive Signatures
LINC00672	CD8_TRM_Signature_Up	Prognostic and Predictive Signatures
RP11-357H14.17	CD8_TRM_Signature_Up	Prognostic and Predictive Signatures
GNGT2	CD8_TRM_Signature_Up	Prognostic and Predictive Signatures
ABI3	CD8_TRM_Signature_Up	Prognostic and Predictive Signatures
SCPEP1	CD8_TRM_Signature_Up	Prognostic and Predictive Signatures
PECAM1	CD8_TRM_Signature_Up	Prognostic and Predictive Signatures
FBF1	CD8_TRM_Signature_Up	Prognostic and Predictive Signatures
GALNT1	CD8_TRM_Signature_Up	Prognostic and Predictive Signatures
BCAS4	CD8_TRM_Signature_Up	Prognostic and Predictive Signatures
ZFP82	CD8_TRM_Signature_Up	Prognostic and Predictive Signatures
LINC01480	CD8_TRM_Signature_Up	Prognostic and Predictive Signatures
ATP1A3	CD8_TRM_Signature_Up	Prognostic and Predictive Signatures
NKG7	CD8_TRM_Signature_Up	Prognostic and Predictive Signatures
KIR2DL4	CD8_TRM_Signature_Up	Prognostic and Predictive Signatures
DGCR6	CD8_TRM_Signature_Up	Prognostic and Predictive Signatures
KIAA1671	CD8_TRM_Signature_Up	Prognostic and Predictive Signatures
HMOX1	CD8_TRM_Signature_Up	Prognostic and Predictive Signatures
APOBEC3H	CD8_TRM_Signature_Up	Prognostic and Predictive Signatures
LINC00158	CD8_TRM_Signature_Up	Prognostic and Predictive Signatures
MIR155HG	CD8_TRM_Signature_Up	Prognostic and Predictive Signatures
CCND2	CD4_Th1_signature	Prognostic and Predictive Signatures
CD38	CD4_Th1_signature	Prognostic and Predictive Signatures
CTLA4	CD4_Th1_signature	Prognostic and Predictive Signatures
RAB27A	CD4_Th1_signature	Prognostic and Predictive Signatures
RAB33A	CD4_Th1_signature	Prognostic and Predictive Signatures
SH2D2A	CD4_Th1_signature	Prognostic and Predictive Signatures
STAT1	CD4_Th1_signature	Prognostic and Predictive Signatures
TNFRSF4	CD4_Th1_signature	Prognostic and Predictive Signatures
IL12RB2	CD4_Th1_signature	Prognostic and Predictive Signatures
SAMD9L	CD4_Th1_signature	Prognostic and Predictive Signatures
CXCL9	CD4_Th1_signature	Prognostic and Predictive Signatures
IFNG	CD4_Th1_signature	Prognostic and Predictive Signatures
PDCD1	Inhibitory	Immune Checkpoints and Exhaustion
CD274	Inhibitory	Immune Checkpoints and Exhaustion
CTLA4	Inhibitory	Immune Checkpoints and Exhaustion
CD80	Inhibitory	Immune Checkpoints and Exhaustion
CD86	Inhibitory	Immune Checkpoints and Exhaustion
CD276	Inhibitory	Immune Checkpoints and Exhaustion
VTCN1	Inhibitory	Immune Checkpoints and Exhaustion
BTLA	Inhibitory	Immune Checkpoints and Exhaustion
TNFRSF14	Inhibitory	Immune Checkpoints and Exhaustion
LAG3	Inhibitory	Immune Checkpoints and Exhaustion
HAVCR2	Inhibitory	Immune Checkpoints and Exhaustion
LGALS9	Inhibitory	Immune Checkpoints and Exhaustion
IDO1	Inhibitory	Immune Checkpoints and Exhaustion
CEACAM1	Inhibitory	Immune Checkpoints and Exhaustion
SIRPA	Inhibitory	Immune Checkpoints and Exhaustion
CD47	Inhibitory	Immune Checkpoints and Exhaustion
CD48	Inhibitory	Immune Checkpoints and Exhaustion
PVR	Co-stimulatory	Immune Checkpoints and Exhaustion
CD40	Co-stimulatory	Immune Checkpoints and Exhaustion
CD40LG	Co-stimulatory	Immune Checkpoints and Exhaustion
TNFRSF4	Co-stimulatory	Immune Checkpoints and Exhaustion
TNFSF4	Co-stimulatory	Immune Checkpoints and Exhaustion
HVEM	Co-stimulatory	Immune Checkpoints and Exhaustion
ADORA2A	Co-stimulatory	Immune Checkpoints and Exhaustion
CD28	Co-stimulatory	Immune Checkpoints and Exhaustion
CD80	Co-stimulatory	Immune Checkpoints and Exhaustion
CD27	Co-stimulatory	Immune Checkpoints and Exhaustion
CD70	Co-stimulatory	Immune Checkpoints and Exhaustion
TNFRSF9	Co-stimulatory	Immune Checkpoints and Exhaustion
TNFSF9	Co-stimulatory	Immune Checkpoints and Exhaustion
ICOS	Co-stimulatory	Immune Checkpoints and Exhaustion
ICOSLG	Co-stimulatory	Immune Checkpoints and Exhaustion
LAG3	Exaustion	Immune Checkpoints and Exhaustion
CD244	Exaustion	Immune Checkpoints and Exhaustion
CD160	Exaustion	Immune Checkpoints and Exhaustion
HAVCR2	Exaustion	Immune Checkpoints and Exhaustion
ADIPOQ	Cytokine activity	Cytokines and Chemokines
AIMP1	Cytokine activity	Cytokines and Chemokines
AREG	Cytokine activity	Cytokines and Chemokines
BMP1	Cytokine activity	Cytokines and Chemokines
BMP10	Cytokine activity	Cytokines and Chemokines
BMP15	Cytokine activity	Cytokines and Chemokines
BMP2	Cytokine activity	Cytokines and Chemokines
BMP3	Cytokine activity	Cytokines and Chemokines
BMP4	Cytokine activity	Cytokines and Chemokines
BMP5	Cytokine activity	Cytokines and Chemokines
BMP6	Cytokine activity	Cytokines and Chemokines
BMP7	Cytokine activity	Cytokines and Chemokines
BMP8A	Cytokine activity	Cytokines and Chemokines
BMP8B	Cytokine activity	Cytokines and Chemokines
C17orf99	Cytokine activity	Cytokines and Chemokines
C1QTNF4	Cytokine activity	Cytokines and Chemokines
CD40LG	Cytokine activity	Cytokines and Chemokines
CD70	Cytokine activity	Cytokines and Chemokines
CER1	Cytokine activity	Cytokines and Chemokines
CLCF1	Cytokine activity	Cytokines and Chemokines
CMTM1	Cytokine activity	Cytokines and Chemokines
CMTM2	Cytokine activity	Cytokines and Chemokines
CMTM3	Cytokine activity	Cytokines and Chemokines
CMTM5	Cytokine activity	Cytokines and Chemokines
CMTM7	Cytokine activity	Cytokines and Chemokines
CMTM8	Cytokine activity	Cytokines and Chemokines
CNTF	Cytokine activity	Cytokines and Chemokines
CRLF1	Cytokine activity	Cytokines and Chemokines
CSF1	Cytokine activity	Cytokines and Chemokines
CSF2	Cytokine activity	Cytokines and Chemokines
CSF3	Cytokine activity	Cytokines and Chemokines
CTF1	Cytokine activity	Cytokines and Chemokines
EBI3	Cytokine activity	Cytokines and Chemokines
EDN1	Cytokine activity	Cytokines and Chemokines
EPO	Cytokine activity	Cytokines and Chemokines
FAM3B	Cytokine activity	Cytokines and Chemokines
FAM3C	Cytokine activity	Cytokines and Chemokines
FAM3D	Cytokine activity	Cytokines and Chemokines
FASLG	Cytokine activity	Cytokines and Chemokines
FGF2	Cytokine activity	Cytokines and Chemokines
FLT3LG	Cytokine activity	Cytokines and Chemokines
GDF1	Cytokine activity	Cytokines and Chemokines
GDF10	Cytokine activity	Cytokines and Chemokines
GDF11	Cytokine activity	Cytokines and Chemokines
GDF15	Cytokine activity	Cytokines and Chemokines
GDF2	Cytokine activity	Cytokines and Chemokines
GDF3	Cytokine activity	Cytokines and Chemokines
GDF5	Cytokine activity	Cytokines and Chemokines
GDF6	Cytokine activity	Cytokines and Chemokines
GDF7	Cytokine activity	Cytokines and Chemokines
GDF9	Cytokine activity	Cytokines and Chemokines
GPI	Cytokine activity	Cytokines and Chemokines
GREM1	Cytokine activity	Cytokines and Chemokines
GREM2	Cytokine activity	Cytokines and Chemokines
GRN	Cytokine activity	Cytokines and Chemokines
HMGB1	Cytokine activity	Cytokines and Chemokines
IFNA1	Cytokine activity	Cytokines and Chemokines
IFNA10	Cytokine activity	Cytokines and Chemokines
IFNA13	Cytokine activity	Cytokines and Chemokines
IFNA14	Cytokine activity	Cytokines and Chemokines
IFNA16	Cytokine activity	Cytokines and Chemokines
IFNA17	Cytokine activity	Cytokines and Chemokines
IFNA2	Cytokine activity	Cytokines and Chemokines
IFNA21	Cytokine activity	Cytokines and Chemokines
IFNA4	Cytokine activity	Cytokines and Chemokines
IFNA5	Cytokine activity	Cytokines and Chemokines
IFNA6	Cytokine activity	Cytokines and Chemokines
IFNA7	Cytokine activity	Cytokines and Chemokines
IFNA8	Cytokine activity	Cytokines and Chemokines
IFNB1	Cytokine activity	Cytokines and Chemokines
IFNE	Cytokine activity	Cytokines and Chemokines
IFNG	Cytokine activity	Cytokines and Chemokines
IFNK	Cytokine activity	Cytokines and Chemokines
IFNL1	Cytokine activity	Cytokines and Chemokines
IFNL2	Cytokine activity	Cytokines and Chemokines
IFNL3	Cytokine activity	Cytokines and Chemokines
IFNL4	Cytokine activity	Cytokines and Chemokines
IFNW1	Cytokine activity	Cytokines and Chemokines
IL10	Cytokine activity	Cytokines and Chemokines
IL11	Cytokine activity	Cytokines and Chemokines
IL12A	Cytokine activity	Cytokines and Chemokines
IL12B	Cytokine activity	Cytokines and Chemokines
IL13	Cytokine activity	Cytokines and Chemokines
IL15	Cytokine activity	Cytokines and Chemokines
IL16	Cytokine activity	Cytokines and Chemokines
IL17A	Cytokine activity	Cytokines and Chemokines
IL17B	Cytokine activity	Cytokines and Chemokines
IL17C	Cytokine activity	Cytokines and Chemokines
IL17D	Cytokine activity	Cytokines and Chemokines
IL17F	Cytokine activity	Cytokines and Chemokines
IL18	Cytokine activity	Cytokines and Chemokines
IL19	Cytokine activity	Cytokines and Chemokines
IL1A	Cytokine activity	Cytokines and Chemokines
IL1B	Cytokine activity	Cytokines and Chemokines
IL1F10	Cytokine activity	Cytokines and Chemokines
IL1RN	Cytokine activity	Cytokines and Chemokines
IL2	Cytokine activity	Cytokines and Chemokines
IL20	Cytokine activity	Cytokines and Chemokines
IL21	Cytokine activity	Cytokines and Chemokines
IL22	Cytokine activity	Cytokines and Chemokines
IL23A	Cytokine activity	Cytokines and Chemokines
IL24	Cytokine activity	Cytokines and Chemokines
IL25	Cytokine activity	Cytokines and Chemokines
IL26	Cytokine activity	Cytokines and Chemokines
IL27	Cytokine activity	Cytokines and Chemokines
IL3	Cytokine activity	Cytokines and Chemokines
IL31	Cytokine activity	Cytokines and Chemokines
IL32	Cytokine activity	Cytokines and Chemokines
IL33	Cytokine activity	Cytokines and Chemokines
IL34	Cytokine activity	Cytokines and Chemokines
IL36A	Cytokine activity	Cytokines and Chemokines
IL36B	Cytokine activity	Cytokines and Chemokines
IL36G	Cytokine activity	Cytokines and Chemokines
IL36RN	Cytokine activity	Cytokines and Chemokines
IL37	Cytokine activity	Cytokines and Chemokines
IL4	Cytokine activity	Cytokines and Chemokines
IL5	Cytokine activity	Cytokines and Chemokines
IL6	Cytokine activity	Cytokines and Chemokines
IL7	Cytokine activity	Cytokines and Chemokines
IL9	Cytokine activity	Cytokines and Chemokines
INHA	Cytokine activity	Cytokines and Chemokines
INHBA	Cytokine activity	Cytokines and Chemokines
INHBB	Cytokine activity	Cytokines and Chemokines
INHBC	Cytokine activity	Cytokines and Chemokines
INHBE	Cytokine activity	Cytokines and Chemokines
KITLG	Cytokine activity	Cytokines and Chemokines
LEFTY1	Cytokine activity	Cytokines and Chemokines
LEFTY2	Cytokine activity	Cytokines and Chemokines
LIF	Cytokine activity	Cytokines and Chemokines
LTA	Cytokine activity	Cytokines and Chemokines
LTB	Cytokine activity	Cytokines and Chemokines
MIF	Cytokine activity	Cytokines and Chemokines
MSMP	Cytokine activity	Cytokines and Chemokines
MSTN	Cytokine activity	Cytokines and Chemokines
NAMPT	Cytokine activity	Cytokines and Chemokines
NDP	Cytokine activity	Cytokines and Chemokines
NODAL	Cytokine activity	Cytokines and Chemokines
NRG1	Cytokine activity	Cytokines and Chemokines
OSM	Cytokine activity	Cytokines and Chemokines
SCG2	Cytokine activity	Cytokines and Chemokines
SCGB3A1	Cytokine activity	Cytokines and Chemokines
SECTM1	Cytokine activity	Cytokines and Chemokines
SLURP1	Cytokine activity	Cytokines and Chemokines
SPP1	Cytokine activity	Cytokines and Chemokines
TAFA5	Cytokine activity	Cytokines and Chemokines
TGFB1	Cytokine activity	Cytokines and Chemokines
TGFB2	Cytokine activity	Cytokines and Chemokines
TGFB3	Cytokine activity	Cytokines and Chemokines
THNSL2	Cytokine activity	Cytokines and Chemokines
THPO	Cytokine activity	Cytokines and Chemokines
TIMP1	Cytokine activity	Cytokines and Chemokines
TNF	Cytokine activity	Cytokines and Chemokines
TNFRSF11B	Cytokine activity	Cytokines and Chemokines
TNFSF10	Cytokine activity	Cytokines and Chemokines
TNFSF11	Cytokine activity	Cytokines and Chemokines
TNFSF12	Cytokine activity	Cytokines and Chemokines
TNFSF13	Cytokine activity	Cytokines and Chemokines
TNFSF13B	Cytokine activity	Cytokines and Chemokines
TNFSF14	Cytokine activity	Cytokines and Chemokines
TNFSF15	Cytokine activity	Cytokines and Chemokines
TNFSF18	Cytokine activity	Cytokines and Chemokines
TNFSF4	Cytokine activity	Cytokines and Chemokines
TNFSF8	Cytokine activity	Cytokines and Chemokines
TNFSF9	Cytokine activity	Cytokines and Chemokines
TSLP	Cytokine activity	Cytokines and Chemokines
VEGFA	Cytokine activity	Cytokines and Chemokines
VSTM1	Cytokine activity	Cytokines and Chemokines
WNT1	Cytokine activity	Cytokines and Chemokines
WNT10A	Cytokine activity	Cytokines and Chemokines
WNT10B	Cytokine activity	Cytokines and Chemokines
WNT11	Cytokine activity	Cytokines and Chemokines
WNT16	Cytokine activity	Cytokines and Chemokines
WNT2	Cytokine activity	Cytokines and Chemokines
WNT2B	Cytokine activity	Cytokines and Chemokines
WNT3	Cytokine activity	Cytokines and Chemokines
WNT3A	Cytokine activity	Cytokines and Chemokines
WNT4	Cytokine activity	Cytokines and Chemokines
WNT5A	Cytokine activity	Cytokines and Chemokines
WNT5B	Cytokine activity	Cytokines and Chemokines
WNT6	Cytokine activity	Cytokines and Chemokines
WNT7A	Cytokine activity	Cytokines and Chemokines
WNT7B	Cytokine activity	Cytokines and Chemokines
WNT8A	Cytokine activity	Cytokines and Chemokines
WNT8B	Cytokine activity	Cytokines and Chemokines
WNT9A	Cytokine activity	Cytokines and Chemokines
WNT9B	Cytokine activity	Cytokines and Chemokines
C10orf99	Chemokine activity	Cytokines and Chemokines
C5	Chemokine activity	Cytokines and Chemokines
CCL1	Chemokine activity	Cytokines and Chemokines
CCL11	Chemokine activity	Cytokines and Chemokines
CCL13	Chemokine activity	Cytokines and Chemokines
CCL14	Chemokine activity	Cytokines and Chemokines
CCL15	Chemokine activity	Cytokines and Chemokines
CCL16	Chemokine activity	Cytokines and Chemokines
CCL17	Chemokine activity	Cytokines and Chemokines
CCL18	Chemokine activity	Cytokines and Chemokines
CCL19	Chemokine activity	Cytokines and Chemokines
CCL2	Chemokine activity	Cytokines and Chemokines
CCL20	Chemokine activity	Cytokines and Chemokines
CCL21	Chemokine activity	Cytokines and Chemokines
CCL22	Chemokine activity	Cytokines and Chemokines
CCL23	Chemokine activity	Cytokines and Chemokines
CCL24	Chemokine activity	Cytokines and Chemokines
CCL25	Chemokine activity	Cytokines and Chemokines
CCL26	Chemokine activity	Cytokines and Chemokines
CCL27	Chemokine activity	Cytokines and Chemokines
CCL28	Chemokine activity	Cytokines and Chemokines
CCL3	Chemokine activity	Cytokines and Chemokines
CCL3L1	Chemokine activity	Cytokines and Chemokines
CCL3L3	Chemokine activity	Cytokines and Chemokines
CCL4	Chemokine activity	Cytokines and Chemokines
CCL4L1	Chemokine activity	Cytokines and Chemokines
CCL5	Chemokine activity	Cytokines and Chemokines
CCL7	Chemokine activity	Cytokines and Chemokines
CCL8	Chemokine activity	Cytokines and Chemokines
CKLF	Chemokine activity	Cytokines and Chemokines
CX3CL1	Chemokine activity	Cytokines and Chemokines
CXCL1	Chemokine activity	Cytokines and Chemokines
CXCL10	Chemokine activity	Cytokines and Chemokines
CXCL11	Chemokine activity	Cytokines and Chemokines
CXCL12	Chemokine activity	Cytokines and Chemokines
CXCL13	Chemokine activity	Cytokines and Chemokines
CXCL14	Chemokine activity	Cytokines and Chemokines
CXCL16	Chemokine activity	Cytokines and Chemokines
CXCL2	Chemokine activity	Cytokines and Chemokines
CXCL3	Chemokine activity	Cytokines and Chemokines
CXCL5	Chemokine activity	Cytokines and Chemokines
CXCL6	Chemokine activity	Cytokines and Chemokines
CXCL8	Chemokine activity	Cytokines and Chemokines
CXCL9	Chemokine activity	Cytokines and Chemokines
PF4	Chemokine activity	Cytokines and Chemokines
PF4V1	Chemokine activity	Cytokines and Chemokines
PPBP	Chemokine activity	Cytokines and Chemokines
XCL1	Chemokine activity	Cytokines and Chemokines
XCL2	Chemokine activity	Cytokines and Chemokines
CCL4L2	Chemokine activity	Cytokines and Chemokines

## Sheet: S11
Symbol	baseMean	log2FoldChange	lfcSE	stat	pvalue	padj
DDX11L1	0.258591	0.0361164	0.238136	0.151663	0.879453	0.952312
WASH7P	12.9839	0.0089184	0.240915	0.0370188	0.97047	0.988908
MIR6859-3	0	NA	NA	NA	NA	NA
MIR6859-2	0	NA	NA	NA	NA	NA
MIR6859-1	0	NA	NA	NA	NA	NA
MIR6859-4	0	NA	NA	NA	NA	NA
MIR1302-2	0	NA	NA	NA	NA	NA
MIR1302-11	0	NA	NA	NA	NA	NA
MIR1302-9	0	NA	NA	NA	NA	NA
MIR1302-10	0	NA	NA	NA	NA	NA
FAM138A	0	NA	NA	NA	NA	NA
FAM138C	0	NA	NA	NA	NA	NA
FAM138F	0	NA	NA	NA	NA	NA
OR4F5	0	NA	NA	NA	NA	NA
LOC729737	21.6382	0.00621068	0.275508	0.0225426	0.982015	0.99281
FAM138D	0.114211	0.0336867	0.133058	0.253174	0.800134	0.919167
OR4F29	0	NA	NA	NA	NA	NA
OR4F3	0	NA	NA	NA	NA	NA
OR4F16	0	NA	NA	NA	NA	NA
LOC100132287	0	NA	NA	NA	NA	NA
LOC100132062	0	NA	NA	NA	NA	NA
LOC101928626	0.250746	0.107664	0.199126	0.540682	0.588727	0.808739
MIR6723	14.6335	0.441058	0.288829	1.52705	0.126747	0.370551
LOC100133331	5.06477	0.601795	0.295728	2.03497	0.0418544	0.200593
LOC100288069	42.5306	-0.323782	0.188314	-1.71937	0.0855468	0.300656
FAM87B	18.7038	-0.277571	0.205536	-1.35047	0.176864	0.444771
LINC00115	13.8538	-0.336374	0.23622	-1.42398	0.154451	0.412666
LINC01128	116.11	0.117984	0.182787	0.645473	0.51862	0.762905
FAM41C	1.0661	0.420299	0.304993	1.37806	0.168184	0.432954
LOC100130417	19.3344	-0.178404	0.276968	-0.644131	0.51949	0.763354
SAMD11	28.8483	-0.0980973	0.244524	-0.401177	0.68829	0.866127
NOC2L	179.991	0.285146	0.140348	2.0317	0.0421837	0.20164
KLHL17	52.9508	0.138698	0.219157	0.632871	0.526818	0.768403
PLEKHN1	43.1295	-0.0355913	0.207194	-0.171778	0.863612	0.94818
PERM1	15.0731	0.00278021	0.238719	0.0116464	0.990708	0.996325
HES4	41.5173	-0.212398	0.233416	-0.909955	0.362846	0.644129
ISG15	122.843	0.131095	0.304558	0.430443	0.666873	0.854669
AGRN	1212.69	-0.0143774	0.19891	-0.072281	0.942378	0.977599
RNF223	6.95667	-0.0012015	0.30255	-0.00397124	0.996831	0.998583
C1orf159	67.4283	-0.21336	0.200305	-1.06517	0.286797	0.572161
LINC01342	4.51088	0.286163	0.290301	0.985745	0.324258	0.608703
MIR200B	3.19871	-0.129544	0.317831	-0.407587	0.683577	0.863558
MIR200A	3.15854	-0.829153	0.315333	-2.62945	0.00855225	0.0796588
MIR429	3.80676	-0.652535	0.31265	-2.08711	0.0368784	0.187326
TTLL10	7.61586	0.274023	0.276087	0.992525	0.320942	0.605649
TNFRSF18	22.298	-0.387094	0.305908	-1.26539	0.205731	0.481213
TNFRSF4	10.1695	-0.0554825	0.264336	-0.209893	0.833751	0.934145
SDF4	278.257	0.322109	0.1648	1.95454	0.0506374	0.2241
B3GALT6	119.213	-0.291786	0.164983	-1.76858	0.0769636	0.283125
FAM132A	6.45387	0.473376	0.301197	1.57165	0.116032	0.353045
UBE2J2	145.958	0.0548862	0.119688	0.458579	0.646537	0.843571
SCNN1D	59.7648	-0.0262903	0.216489	-0.121439	0.903343	0.962844
ACAP3	268.915	0.0716925	0.201192	0.35634	0.721586	0.884664
MIR6726	0	NA	NA	NA	NA	NA
PUSL1	45.2877	-0.121721	0.19438	-0.626204	0.531181	0.771118
CPSF3L	248.954	-0.0173374	0.138364	-0.125303	0.900284	0.962035
MIR6727	0.0491254	0.00411104	0.133058	0.0308967	0.975352	0.989843
CPTP	80.9243	0.124947	0.181727	0.687556	0.491732	0.746118
TAS1R3	21.8033	-0.556076	0.204787	-2.71539	0.00661985	0.0685005
DVL1	218.184	-0.142331	0.17279	-0.823723	0.410097	0.685329
MIR6808	0.0303509	0.0218564	0.133058	0.164263	0.869524	0.94818
MXRA8	781.606	-0.0620598	0.174053	-0.356556	0.721424	0.88455
AURKAIP1	85.9073	0.298019	0.186957	1.59405	0.110924	0.344531
CCNL2	842.198	-0.287137	0.120473	-2.38341	0.0171529	0.118755
LOC148413	78.7223	0.0709587	0.13756	0.515837	0.605968	0.820302
MRPL20	109.583	0.384931	0.117143	3.28598	0.00101628	0.023532
ANKRD65	29.532	-0.00743719	0.214793	-0.0346249	0.972379	0.98966
TMEM88B	1.00903	0.0466929	0.31528	0.1481	0.882264	0.95394
LOC102724312	14.1338	-0.328313	0.285763	-1.1489	0.250598	0.533446
VWA1	273.261	-0.13694	0.20843	-0.657006	0.511177	0.757673
ATAD3C	35.3064	0.113148	0.262002	0.431859	0.665844	0.854169
ATAD3B	94.6021	5.68e-06	0.163086	3.48e-05	0.999972	0.999996
ATAD3A	66.6179	-0.0359716	0.175019	-0.205529	0.837158	0.935712
TMEM240	5.65517	0.262543	0.272656	0.962911	0.335592	0.618847
SSU72	198.605	0.176552	0.111747	1.57993	0.114123	0.349819
C1orf233	37.6513	-0.198341	0.188623	-1.05152	0.293019	0.579099
MIB2	127.152	-0.0426283	0.181108	-0.235375	0.813918	0.926977
MMP23B	1.33304	0.334962	0.316312	1.05896	0.289617	0.575673
MMP23A	0.0918804	0.0100262	0.133058	0.0753521	0.939935	0.976446
CDK11B	79.4993	0.382415	0.123351	3.10022	0.0019338	0.0343218
SLC35E2B	583.102	-0.153802	0.187354	-0.820918	0.411693	0.686558
CDK11A	55.5148	-0.103026	0.141557	-0.727801	0.466736	0.728276
SLC35E2	337.939	-0.156634	0.155365	-1.00817	0.313374	0.598443
NADK	277.246	-0.0959284	0.131111	-0.731658	0.464377	0.727262
GNB1	1755.97	0.0625556	0.113063	0.553282	0.58007	0.804827
CALML6	5.9989	0.310518	0.269368	1.15277	0.249006	0.5318
TMEM52	3.14885	0.230243	0.314347	0.732448	0.463895	0.727176
CFAP74	10.2101	0.210704	0.319568	0.65934	0.509677	0.756741
GABRD	12.281	0.0356617	0.269824	0.132166	0.894853	0.959952
PRKCZ	77.2018	0.0286228	0.151102	0.189427	0.849758	0.941662
FAAP20	125.251	0.0211159	0.163064	0.129495	0.896966	0.960887
SKI	700.397	-0.137741	0.117246	-1.1748	0.240074	0.521673
MORN1	114.418	-0.0761069	0.184048	-0.413517	0.679228	0.861338
LOC100129534	20.4558	-0.0446457	0.235842	-0.189304	0.849855	0.941662
RER1	441.722	0.0416938	0.0927664	0.449449	0.653108	0.847568
PEX10	61.311	-0.144657	0.174054	-0.831103	0.405915	0.68205
PLCH2	78.4668	-0.0120649	0.223753	-0.0539207	0.956998	0.983502
PANK4	92.8488	0.0464865	0.124679	0.37285	0.70926	0.877552
HES5	3.23225	0.151934	0.306556	0.495616	0.620165	0.829433
LOC115110	52.6274	-0.0165008	0.19251	-0.085714	0.931694	0.974194
TNFRSF14	194.666	0.0895891	0.169634	0.52813	0.597409	0.814909
LOC100996583	9.1232	-1.11589	0.263365	-4.23707	2.26e-05	0.00244885
FAM213B	131.79	0.182216	0.204701	0.890156	0.373382	0.6548
MMEL1	10.3081	0.308157	0.279385	1.10298	0.270034	0.553816
TTC34	6.98114	0.427376	0.268013	1.59461	0.110799	0.344367
ACTRT2	0.23049	0.219733	0.252616	0.869833	0.384391	0.664596
LINC00982	4.10227	0.323214	0.31409	1.02905	0.303458	0.589423
PRDM16	14.1226	0.81753	0.255726	3.1969	0.00138915	0.0278921
MIR4251	0.214297	0.162003	0.213783	0.757795	0.448574	0.716081
ARHGEF16	112.052	-0.287426	0.197045	-1.45868	0.144653	0.397766
MEGF6	475.493	-0.204427	0.198899	-1.0278	0.304046	0.589757
MIR551A	0.247027	0.149139	0.228517	0.652641	0.513988	0.759314
TPRG1L	230.738	-0.113611	0.0993839	-1.14315	0.252976	0.536316
WRAP73	80.326	-0.0708767	0.166307	-0.426179	0.669978	0.855793
TP73	31.143	-0.0291826	0.175766	-0.166031	0.868133	0.94818
TP73-AS1	219.839	0.0183611	0.154328	0.118975	0.905295	0.963039
CCDC27	3.95317	0.593412	0.319373	1.85805	0.0631612	0.2532
SMIM1	11.3722	-0.126215	0.288835	-0.43698	0.662126	0.852053
LRRC47	212.271	0.0384341	0.108403	0.354549	0.722928	0.885409
CEP104	264.623	0.0134443	0.104003	0.129268	0.897145	0.961039
DFFB	54.895	-0.0536292	0.146439	-0.366223	0.714198	0.880464
C1orf174	89.867	0.0371909	0.0808879	0.459783	0.645672	0.843125
LINC01134	7.48684	-0.0819534	0.264998	-0.309261	0.757123	0.901644
LINC01346	0.252061	0.201951	0.243838	0.82822	0.407546	0.683615
LOC284661	1.3058	0.811194	0.29763	2.72551	0.00642026	0.0674005
AJAP1	7.79554	0.629237	0.29137	2.15958	0.0308049	0.168075
MIR4417	0.155557	0.0713694	0.155298	0.459564	0.645829	0.843125
MIR4689	0.637519	0.262605	0.286632	0.916175	0.359575	0.640861
NPHP4	133.494	-0.0899001	0.147683	-0.608735	0.5427	0.779471
KCNAB2	120.202	0.166409	0.182621	0.911222	0.362178	0.643446
CHD5	7.70919	0.434523	0.320329	1.35649	0.174944	0.442296
RPL22	1205.5	0.264881	0.137009	1.93331	0.0531983	0.231024
LOC102724450	4.22222	0.272762	0.29413	0.92735	0.353745	0.636019
RNF207	124.174	-0.0263895	0.201157	-0.131189	0.895626	0.960197
ICMT	490.955	-0.165133	0.0892003	-1.85126	0.064132	0.255252
LINC00337	1.68562	0.599203	0.31545	1.89952	0.0574965	0.241722
HES3	0.31384	0.0468306	0.244954	0.191181	0.848384	0.941015
GPR153	98.073	-0.151235	0.178877	-0.845468	0.39785	0.674795
ACOT7	49.9597	0.322823	0.20758	1.55518	0.119904	0.359618
HES2	15.6128	-0.0947145	0.309565	-0.30596	0.759635	0.903006
ESPN	92.0914	-0.183993	0.26729	-0.688365	0.491223	0.745844
MIR4252	1.14801	-0.338843	0.315515	-1.07394	0.282851	0.568382
TNFRSF25	68.6548	0.156223	0.17154	0.910703	0.362452	0.643698
PLEKHG5	156.976	0.0503559	0.191416	0.263071	0.792496	0.916765
NOL9	340.766	-0.176143	0.0910232	-1.93514	0.0529726	0.230284
TAS1R1	3.71039	0.938404	0.313162	2.99654	0.00273058	0.042113
ZBTB48	109.723	0.00790068	0.140058	0.05641	0.955015	0.982486
KLHL21	312.104	0.00571507	0.183941	0.0310701	0.975214	0.989843
PHF13	228.221	0.345948	0.128114	2.70032	0.00692731	0.070267
THAP3	46.8633	0.0880086	0.159306	0.55245	0.58064	0.805087
DNAJC11	119.703	0.208394	0.130301	1.59933	0.109748	0.342434
LOC100505887	0.53849	0.472207	0.261441	1.80617	0.0708921	0.269673
CAMTA1	193.307	0.0572757	0.173199	0.330694	0.740876	0.893726
VAMP3	491.947	-0.0827731	0.11494	-0.720143	0.471437	0.731412
PER3	475.399	0.107018	0.208803	0.512529	0.608281	0.821827
UTS2	3.03597	-0.11771	0.320439	-0.367341	0.713365	0.879787
TNFRSF9	25.731	0.499338	0.254043	1.96557	0.0493488	0.221108
PARK7	297.412	0.49785	0.114528	4.34697	1.38e-05	0.00184983
ERRFI1	652.965	0.367716	0.199555	1.84268	0.065376	0.257949
LOC102724539	0.816975	0.803761	0.296938	2.70683	0.00679291	0.0693409
SLC45A1	12.578	0.432272	0.20726	2.08565	0.0370104	0.187803
RERE	1228.83	0.0982034	0.096988	1.01253	0.311284	0.596906
LOC102724552	35.4409	0.248414	0.155883	1.59359	0.111028	0.344677
ENO1	1334.89	0.39649	0.193911	2.0447	0.0408844	0.198213
MIR6728	0.372043	-0.136336	0.283157	-0.481485	0.630172	0.834494
ENO1-AS1	1.8595	-0.176435	0.317529	-0.555649	0.578451	0.803701
CA6	4.03944	0.775068	0.308209	2.51475	0.0119118	0.0957397
SLC2A7	1.11354	0.467865	0.287	1.63019	0.103061	0.332058
SLC2A5	17.2045	0.150704	0.273682	0.550652	0.581872	0.805606
GPR157	25.6173	-0.311086	0.235473	-1.32111	0.186464	0.457604
MIR34A	2.10088	0.124659	0.310297	0.401742	0.687874	0.865834
H6PD	917.512	-0.094734	0.134266	-0.70557	0.480456	0.737829
SPSB1	159.24	0.235101	0.160218	1.46738	0.142272	0.394486
LOC100506022	8.63059	-0.158923	0.245617	-0.647035	0.517609	0.761959
SLC25A33	45.6244	-0.109734	0.161125	-0.681048	0.495841	0.74846
TMEM201	101.169	-0.0645559	0.146703	-0.440045	0.659905	0.851224
PIK3CD	147.566	0.0411378	0.158983	0.258755	0.795824	0.918363
PIK3CD-AS1	10.9477	-0.259487	0.257358	-1.00827	0.313323	0.598435
PIK3CD-AS2	7.0034	0.373934	0.255023	1.46627	0.142574	0.395033
CLSTN1	992.795	0.161867	0.11649	1.38954	0.16467	0.428493
CTNNBIP1	169.506	0.165664	0.148848	1.11297	0.26572	0.549708
LZIC	160.492	0.187656	0.125197	1.49889	0.133902	0.381595
NMNAT1	88.3458	0.12228	0.113857	1.07398	0.282832	0.568382
MIR5697	1.63996	0.153268	0.317144	0.483278	0.628899	0.834177
RBP7	24.8839	0.795282	0.246824	3.22206	0.00127273	0.0265785
UBE4B	479.383	-0.0164953	0.0874278	-0.188674	0.850348	0.941854
KIF1B	964.995	-0.0442029	0.102891	-0.429611	0.667479	0.854935
MIR1273D	0.435255	-0.0312118	0.286145	-0.109077	0.913142	0.965698
RNU6-1	0	NA	NA	NA	NA	NA
RNU6-2	0	NA	NA	NA	NA	NA
RNU6-7	0	NA	NA	NA	NA	NA
RNU6-9	0	NA	NA	NA	NA	NA
RNU6-8	0	NA	NA	NA	NA	NA
PGD	287.037	0.414515	0.135423	3.06089	0.00220679	0.0372826
APITD1-CORT	0	NA	NA	NA	NA	NA
APITD1	4.24001	-0.426447	0.294132	-1.44985	0.147101	0.401573
CORT	3.49937	-0.701289	0.304767	-2.30107	0.0213879	0.135192
DFFA	123.953	0.145637	0.12097	1.20391	0.228623	0.50783
PEX14	51.4261	0.412257	0.164649	2.50386	0.0122848	0.0975643
CASZ1	482.37	-0.0322776	0.15782	-0.204521	0.837946	0.935912
C1orf127	4.71378	0.954044	0.290979	3.27874	0.0010427	0.0238108
TARDBP	758.607	-0.0972877	0.0914417	-1.06393	0.28736	0.572924
MASP2	57.5312	-0.472453	0.17034	-2.77359	0.00554408	0.0619676
SRM	124.285	0.204725	0.184775	1.10797	0.267877	0.5516
EXOSC10	311.732	0.00620947	0.103884	0.0597728	0.952337	0.981743
MTOR	743.292	-0.0643104	0.101198	-0.635493	0.525107	0.767408
MTOR-AS1	12.5906	0.457305	0.227942	2.00623	0.0448316	0.208751
ANGPTL7	39.7085	0.223617	0.148884	1.50195	0.133109	0.380525
UBIAD1	144.632	0.0793584	0.131343	0.604207	0.545706	0.781372
PTCHD2	13.2274	0.337756	0.291341	1.15932	0.246327	0.529023
LOC101929181	0.830268	0.63944	0.266988	2.39502	0.0166197	0.116785
FBXO2	30.2772	0.474689	0.278006	1.70748	0.0877335	0.304188
FBXO44	112.062	0.176463	0.154379	1.14305	0.253018	0.536362
FBXO6	38.6635	0.167739	0.15442	1.08625	0.277368	0.56222
MAD2L2	55.2815	0.115274	0.183628	0.62776	0.530161	0.770289
DRAXIN	2.51806	0.352543	0.314555	1.12077	0.262387	0.546113
AGTRAP	97.3642	0.177916	0.158937	1.11942	0.262963	0.546422
C1orf167	4.01482	0.787108	0.318063	2.47469	0.0133351	0.102368
LOC102724659	1.40482	0.708594	0.316795	2.23676	0.0253022	0.149208
MTHFR	279.52	-0.267949	0.141614	-1.89211	0.0584761	0.244075
CLCN6	204.13	0.170355	0.110666	1.53936	0.123717	0.365798
NPPA-AS1	5.31381	0.192747	0.266156	0.724188	0.46895	0.729681
NPPA	2.95188	-0.198046	0.30375	-0.652004	0.514399	0.759495
NPPB	0.629149	0.623032	0.287165	2.1696	0.0300375	0.165872
RNU5E-1	748.568	-0.12462	0.307467	-0.405311	0.685249	0.864515
KIAA2013	137.234	0.0690748	0.116558	0.592624	0.553433	0.787407
PLOD1	363.08	0.127016	0.142758	0.88973	0.373611	0.655044
MFN2	540.263	0.115104	0.102159	1.12671	0.259864	0.543655
MIIP	58.4488	0.375557	0.17381	2.16074	0.0307154	0.167801
MIR6729	0	NA	NA	NA	NA	NA
TNFRSF8	9.25998	0.383578	0.285044	1.34568	0.178405	0.44737
MIR7846	0	NA	NA	NA	NA	NA
TNFRSF1B	166.222	0.360436	0.177089	2.03534	0.0418171	0.200528
MIR4632	0.311716	0.0805783	0.242695	0.332015	0.739878	0.893281
VPS13D	2035.55	-0.203778	0.0941034	-2.16547	0.030352	0.166959
SNORA59A	0	NA	NA	NA	NA	NA
SNORA59B	0	NA	NA	NA	NA	NA
DHRS3	137.552	0.382981	0.177333	2.15968	0.0307975	0.168075
MIR6730	0.439741	-0.24554	0.285846	-0.858992	0.390345	0.668504
AADACL4	0.867965	0.619066	0.276147	2.2418	0.0249744	0.147855
AADACL3	2.14059	0.978662	0.304609	3.21285	0.00131425	0.0270474
C1orf158	0.794278	0.708963	0.268335	2.64208	0.00823989	0.0780044
PRAMEF12	0.829412	0.571887	0.273025	2.09463	0.0362038	0.185716
PRAMEF1	1.14645	0.544307	0.263325	2.06705	0.0387292	0.192327
PRAMEF11	0.642211	0.595034	0.273556	2.17518	0.0296163	0.164412
HNRNPCL1	0.464744	0.31113	0.268851	1.15726	0.247168	0.529942
PRAMEF2	0.876432	0.701161	0.275695	2.54325	0.0109825	0.0919653
PRAMEF4	0.649568	0.410617	0.261407	1.5708	0.116229	0.353392
PRAMEF10	0.342436	0.272892	0.20908	1.3052	0.191824	0.464011
PRAMEF7	0.0852617	0.0396018	0.133058	0.297629	0.765986	0.904326
PRAMEF6	0.255842	0.0979009	0.216885	0.451394	0.651705	0.847051
LOC101929983	0.12605	0.0506235	0.149446	0.338741	0.734805	0.890372
HNRNPCL3	0	NA	NA	NA	NA	NA
HNRNPCL4	0	NA	NA	NA	NA	NA
PRAMEF25	0	NA	NA	NA	NA	NA
PRAMEF26	0	NA	NA	NA	NA	NA
LOC649324	0	NA	NA	NA	NA	NA
LOC645354	0	NA	NA	NA	NA	NA
HNRNPCL2	0.58357	0.305232	0.212444	1.43677	0.150784	0.406785
PRAMEF9	0	NA	NA	NA	NA	NA
LOC400736	0.0877961	0.0396018	0.133058	0.297629	0.765986	0.904326
LOC391003	0.132747	0.0396018	0.133058	0.297629	0.765986	0.904326
PRAMEF22	0	NA	NA	NA	NA	NA
PRAMEF5	0.298231	0.238867	0.205935	1.15991	0.246085	0.528759
PRAMEF8	0.204082	0.103782	0.194451	0.53372	0.593535	0.812019
LOC645382	0.12821	0.0639316	0.166589	0.383769	0.70115	0.87336
PRAMEF15	0.41398	0.337095	0.247512	1.36194	0.173218	0.440024
PRAMEF14	0.793484	0.224538	0.252089	0.890708	0.373086	0.654631
PRAMEF19	0.870143	0.513329	0.286998	1.78862	0.0736764	0.27617
PRAMEF16	0	NA	NA	NA	NA	NA
PRAMEF17	0	NA	NA	NA	NA	NA
PRAMEF20	1.21498	0.902602	0.304469	2.96451	0.00303165	0.0447304
LRRC38	0.819602	0.615233	0.278148	2.21189	0.0269743	0.154753
PDPN	127.031	-0.045416	0.15133	-0.300112	0.764092	0.904326
PRDM2	644.647	-0.189796	0.110219	-1.72198	0.0850732	0.299826
KAZN	136.692	0.261541	0.192393	1.35941	0.174018	0.440853
TMEM51-AS1	17.6829	0.257282	0.25011	1.02868	0.303632	0.589591
TMEM51	60.977	0.043252	0.167156	0.258752	0.795827	0.918363
C1orf195	21.0412	-0.122245	0.201219	-0.607524	0.543503	0.780406
FHAD1	42.247	-0.0535378	0.183177	-0.292273	0.770078	0.906246
EFHD2	143.592	0.200688	0.142195	1.41136	0.158139	0.41845
CTRC	1.34307	0.4357	0.312726	1.39323	0.16355	0.426362
CELA2A	2.48277	0.457756	0.32014	1.42986	0.152757	0.409823
CELA2B	5.55198	0.238899	0.278349	0.85827	0.390743	0.668604
CASP9	83.6462	0.357196	0.116896	3.05566	0.00224564	0.0376336
DNAJC16	430.099	-0.201756	0.0855732	-2.3577	0.0183884	0.123817
AGMAT	20.2719	-0.118833	0.225628	-0.526677	0.598418	0.815647
DDI2	134.031	0.20405	0.122544	1.66512	0.0958894	0.319616
RSC1A1	100.728	-0.137356	0.142979	-0.960673	0.336717	0.619898
PLEKHM2	317.989	-0.0492122	0.130585	-0.37686	0.706278	0.875903
SLC25A34	19.2978	-0.590457	0.220834	-2.67376	0.0075005	0.0737064
TMEM82	1.24338	0.465922	0.307165	1.51685	0.129305	0.374681
FBLIM1	216.091	0.12096	0.179493	0.673898	0.500376	0.750844
UQCRHL	3.0122	0.92168	0.281624	3.27273	0.00106514	0.0240741
FLJ37453	34.1802	-0.235915	0.161164	-1.46382	0.143243	0.395931
SPEN	1009.75	-0.0566542	0.0928091	-0.610437	0.541572	0.77842
MIR5096	3.31445	0.629378	0.276606	2.27536	0.0228842	0.140573
ZBTB17	99.4691	0.0618069	0.143588	0.430447	0.66687	0.854669
C1orf64	63.6053	0.102554	0.288478	0.355502	0.722213	0.884905
HSPB7	29.4916	0.56393	0.250135	2.2545	0.0241645	0.145128
CLCNKA	10.5825	0.683862	0.265195	2.57871	0.00991701	0.0867696
CLCNKB	2.05862	0.823683	0.320042	2.57367	0.0100627	0.0873262
FAM131C	1.55135	0.587389	0.311587	1.88515	0.0594092	0.245599
EPHA2	74.5886	0.101586	0.198706	0.511238	0.609184	0.822107
ARHGEF19	114.971	0.219601	0.187279	1.17258	0.240963	0.522827
RSG1	24.4498	0.208666	0.226289	0.922123	0.356464	0.638443
FBXO42	320.095	0.014723	0.0944357	0.155905	0.876108	0.950867
SZRD1	626.801	0.172274	0.110414	1.56025	0.118701	0.357503
SPATA21	6.67848	-0.173164	0.251256	-0.689195	0.490701	0.745494
NECAP2	245.229	0.1092	0.102695	1.06335	0.287625	0.573185
CROCCP3	149.323	-0.197006	0.110703	-1.77959	0.0751437	0.279437
RNU1-1	0	NA	NA	NA	NA	NA
RNU1-2	0	NA	NA	NA	NA	NA
RNU1-3	0	NA	NA	NA	NA	NA
RNU1-28P	0	NA	NA	NA	NA	NA
RNVU1-18	0	NA	NA	NA	NA	NA
RNU1-27P	0	NA	NA	NA	NA	NA
RNU1-4	0	NA	NA	NA	NA	NA
FAM231B	0.53307	0.232619	0.265944	0.87469	0.381743	0.66203
MIR3675	0.348278	0.217741	0.221175	0.98447	0.324884	0.609218
NBPF1	167.284	-0.217834	0.178257	-1.22202	0.221699	0.500042
CROCCP2	92.615	-0.194912	0.151734	-1.28457	0.198944	0.473183
MST1P2	26.7534	-0.0248198	0.217778	-0.113968	0.909263	0.964473
FAM231A	0	NA	NA	NA	NA	NA
FAM231C	0.0166192	0.0218564	0.133058	0.164263	0.869524	0.94818
ESPNP	3.35982	0.303567	0.31679	0.958262	0.337931	0.621185
MST1L	7.15819	0.290394	0.283159	1.02555	0.305103	0.590782
CROCC	192.865	0.121914	0.163101	0.747475	0.454777	0.720131
MFAP2	84.8729	0.116129	0.220333	0.527062	0.598151	0.815504
ATP13A2	277.071	-0.151112	0.170183	-0.887942	0.374572	0.656324
SDHB	155.491	0.0833052	0.145039	0.574363	0.565722	0.79624
PADI2	249.634	0.178367	0.255721	0.697508	0.485485	0.741346
PADI1	3.79396	0.764679	0.317682	2.40706	0.0160817	0.1146
PADI3	6.41657	0.233301	0.316624	0.736841	0.461219	0.725565
MIR3972	0.142632	0.0694023	0.186141	0.372848	0.709261	0.877552
PADI4	2.54278	0.958193	0.319571	2.99837	0.00271426	0.0420067
PADI6	2.86804	1.12475	0.319895	3.51599	0.000438117	0.0140077
RCC2	940.635	0.155268	0.121026	1.28293	0.199516	0.47388
ARHGEF10L	285.861	0.190794	0.155104	1.2301	0.21866	0.496498
ACTL8	2.78228	0.216107	0.299402	0.721795	0.47042	0.730702
LOC101927876	1.73422	0.996263	0.299111	3.33075	0.000866128	0.0215184
IGSF21	41.7093	0.51783	0.291813	1.77453	0.0759756	0.280975
KLHDC7A	96.9453	0.389616	0.319614	1.21902	0.222836	0.50121
PAX7	4.45717	0.382183	0.315614	1.21092	0.225927	0.505004
TAS1R2	1.4631	0.894942	0.300291	2.98025	0.00288017	0.0433196
ALDH4A1	106.201	0.368846	0.193169	1.90944	0.056205	0.238068
MIR4695	0	NA	NA	NA	NA	NA
MIR1290	1.04775	0.350736	0.315571	1.11143	0.266382	0.550304
IFFO2	185.948	0.350877	0.161927	2.16689	0.0302433	0.166541
UBR4	2760.81	-0.0485487	0.096556	-0.502803	0.615103	0.826045
EMC1	530.124	-0.0163811	0.0877908	-0.186593	0.85198	0.94283
MRTO4	115.249	0.127856	0.125483	1.01891	0.308245	0.593934
AKR7L	23.0024	-0.0676969	0.216883	-0.312135	0.754938	0.901197
AKR7A3	66.9834	0.0245024	0.263519	0.0929817	0.925918	0.971727
LOC100506730	52.5886	-0.0903689	0.148978	-0.606594	0.544121	0.780809
AKR7A2	213.132	-0.0388528	0.10766	-0.360885	0.718185	0.882612
PQLC2	65.1221	0.00136528	0.172068	0.00793453	0.993669	0.997732
CAPZB	562.338	0.317595	0.129133	2.45944	0.0139152	0.10496
MINOS1-NBL1	0	NA	NA	NA	NA	NA
MINOS1	176.968	-0.138052	0.139793	-0.987548	0.323374	0.607814
RPS14P3	40.0005	-0.136277	0.250982	-0.542976	0.587146	0.807896
NBL1	14.9595	-0.127504	0.226765	-0.562273	0.57393	0.801387
HTR6	7.05062	0.111214	0.253033	0.439522	0.660284	0.851289
TMCO4	149.058	0.136685	0.142156	0.961517	0.336292	0.619556
RNF186	2.07001	1.1703	0.315479	3.70961	0.000207579	0.00922011
OTUD3	270.265	0.00518539	0.130909	0.0396107	0.968403	0.987741
PLA2G2E	0.592995	0.0511308	0.251438	0.203354	0.838859	0.93627
PLA2G2A	7.88846	1.35267	0.307002	4.40609	1.05e-05	0.00157206
PLA2G5	4.86129	0.383739	0.289195	1.32692	0.184535	0.455324
PLA2G2D	8.18199	0.786096	0.300636	2.61478	0.00892849	0.0817618
PLA2G2F	1.84437	0.183964	0.320416	0.574142	0.565871	0.796273
PLA2G2C	2.52366	-0.212351	0.320206	-0.663169	0.507223	0.755671
UBXN10-AS1	4.84318	0.813304	0.309082	2.63135	0.00850455	0.0794463
UBXN10	117.91	-0.284349	0.246271	-1.15462	0.248247	0.531096
VWA5B1	3.97475	1.03645	0.319945	3.23945	0.0011976	0.0257468
LINC01141	4.27969	0.773543	0.306843	2.52097	0.0117031	0.0948881
CAMK2N1	257.69	-0.34211	0.215878	-1.58474	0.113026	0.348065
MUL1	128.512	0.189047	0.130393	1.44982	0.147107	0.401573
FAM43B	4.59727	0.29188	0.306552	0.952138	0.341027	0.624271
CDA	3.69329	0.668193	0.294305	2.27041	0.023183	0.141819
PINK1	54.4781	0.431854	0.185231	2.33144	0.0197303	0.129042
MIR6084	0	NA	NA	NA	NA	NA
PINK1-AS	34.5788	-0.12119	0.151617	-0.799313	0.424109	0.696261
DDOST	553.59	0.135343	0.129543	1.04477	0.296129	0.582541
KIF17	8.36148	0.38811	0.292491	1.32692	0.184536	0.455324
SH2D5	2.79554	0.65592	0.315632	2.07811	0.0376988	0.189682
HP1BP3	1195.39	-0.193772	0.0918918	-2.1087	0.0349703	0.182204
EIF4G3	706.692	0.0230284	0.1056	0.218072	0.827373	0.933477
MIR1256	6.9004	0.544347	0.273222	1.99233	0.0463351	0.212721
ECE1	901.319	0.121006	0.154243	0.784514	0.432739	0.703806
LOC100506801	43.6806	0.0969154	0.176371	0.549499	0.582663	0.805875
NBPF3	95.6144	0.0322777	0.163738	0.197131	0.843725	0.93882
ALPL	42.7105	0.939212	0.280964	3.34282	0.000829316	0.0209918
RAP1GAP	110.127	0.485903	0.231216	2.10151	0.0355965	0.183886
USP48	509.13	-0.0998036	0.107997	-0.924134	0.355416	0.637378
LDLRAD2	11.8874	-0.0856766	0.225791	-0.379451	0.704353	0.875003
HSPG2	3396.5	0.0330176	0.177819	0.185681	0.852695	0.94297
CELA3B	0.945505	0.160574	0.252978	0.634737	0.5256	0.767822
CELA3A	0.618007	0.234849	0.264792	0.88692	0.375122	0.656685
LOC101928043	4.52667	0.246516	0.260419	0.94661	0.343837	0.627392
LINC00339	71.5117	-0.0961435	0.141736	-0.678326	0.497565	0.749604
CDC42	1691.57	0.194697	0.115319	1.68833	0.0913481	0.310698
WNT4	55.8371	-0.15382	0.199353	-0.771597	0.440353	0.71012
MIR4418	0.0376332	0.0277716	0.133058	0.208718	0.834668	0.934145
ZBTB40	515.786	-0.162223	0.11716	-1.38462	0.166168	0.430462
EPHA8	7.44348	0.726997	0.318537	2.2823	0.0224719	0.139236
MIR6127	0.0389955	0.0218564	0.133058	0.164263	0.869524	0.94818
C1QA	207.535	0.596998	0.234433	2.54656	0.010879	0.0913675
C1QC	237.369	0.728048	0.220012	3.30914	0.000935839	0.0224592
C1QB	199.204	0.624559	0.224926	2.77673	0.00549081	0.0615607
EPHB2	81.5966	-0.0995729	0.181894	-0.547423	0.584088	0.806183
MIR4684	0.298374	-0.0324996	0.245465	-0.1324	0.894668	0.959915
MIR4253	0.161275	0.0483162	0.157709	0.306363	0.759328	0.902809
LACTBL1	0.345651	0.235606	0.205034	1.14911	0.250512	0.533395
C1orf234	1.2055	0.246702	0.312831	0.788612	0.430339	0.702105
KDM1A	502.397	0.0634922	0.0638268	0.994757	0.319854	0.604669
MIR3115	0.841911	0.598862	0.314351	1.90508	0.0567701	0.239615
MIR4419A	0.934864	-0.171085	0.311139	-0.549869	0.582409	0.805697
LUZP1	443.722	-0.059633	0.106531	-0.559771	0.575636	0.802123
HTR1D	6.19626	0.045836	0.319958	0.143256	0.886088	0.956033
LINC01355	194.851	-0.522854	0.154792	-3.37777	0.000730757	0.01933
HNRNPR	1409.9	-0.188801	0.137592	-1.37217	0.170009	0.435544
ZNF436	492.159	-0.123289	0.11257	-1.09522	0.273419	0.557631
ZNF436-AS1	43.5484	-0.0377836	0.196317	-0.192462	0.84738	0.940429
TCEA3	169.768	0.226162	0.184446	1.22617	0.220135	0.498603
ASAP3	307.788	-0.0422623	0.134695	-0.313764	0.7537	0.900393
E2F2	45.362	-0.0393222	0.259994	-0.151243	0.879784	0.952469
LOC101928163	1.8856	-0.210865	0.32058	-0.65776	0.510692	0.757397
ID3	111.275	0.419194	0.189593	2.21102	0.0270342	0.154893
MDS2	1.56936	1.01517	0.316729	3.20516	0.00134985	0.0274922
RPL11	2427.37	0.654397	0.166928	3.92024	8.85e-05	0.00548158
TCEB3	315.092	0.0211643	0.0617773	0.342591	0.731907	0.889542
TCEB3-AS1	9.21818	-0.131025	0.254898	-0.514029	0.607232	0.821001
PITHD1	251.785	0.265601	0.106838	2.48601	0.0129185	0.100561
LYPLA2	168.17	0.32538	0.157541	2.06537	0.0388881	0.192668
GALE	92.7156	0.00883641	0.216339	0.0408451	0.967419	0.987486
HMGCL	138.617	0.194217	0.14572	1.33281	0.182594	0.453158
FUCA1	212.021	0.116459	0.160136	0.72725	0.467073	0.728669
CNR2	5.18909	0.587162	0.317213	1.851	0.0641697	0.255319
MIR378F	0.0705104	0.0159413	0.133058	0.119808	0.904636	0.962844
PNRC2	709.265	-0.0540249	0.163045	-0.331349	0.740381	0.893509
SRSF10	895.924	-0.369418	0.155055	-2.3825	0.0171956	0.118921
MYOM3	12.5722	0.771605	0.284789	2.70939	0.00674061	0.0691109
IL22RA1	4.17591	0.476767	0.294113	1.62103	0.105011	0.334954
IFNLR1	56.4728	0.147921	0.183911	0.804307	0.42122	0.694196
LOC284632	1.764	0.562469	0.305986	1.83822	0.0660305	0.259569
GRHL3	15.6457	0.029796	0.260192	0.114515	0.908829	0.964293
STPG1	43.8111	0.0930387	0.16871	0.55147	0.581311	0.805374
NIPAL3	391.499	-0.120146	0.132324	-0.907965	0.363897	0.645171
RCAN3AS	1.04965	0.363972	0.319507	1.13917	0.254633	0.537826
RCAN3	220.916	0.000912826	0.154511	0.00590784	0.995286	0.998189
LOC100506985	61.5472	-0.184128	0.208018	-0.885154	0.376074	0.657421
NCMAP	13.8354	0.197354	0.294494	0.670144	0.502766	0.75219
SRRM1	475.74	0.0105311	0.105645	0.0996841	0.920595	0.968902
CLIC4	2195.45	-0.318249	0.195903	-1.62453	0.104264	0.333847
RUNX3	70.6836	0.300358	0.184852	1.62485	0.104194	0.333847
MIR6731	0.28604	0.0114533	0.229418	0.0499233	0.960184	0.985021
MIR4425	0.138172	0.0569617	0.185769	0.306626	0.759128	0.902738
SYF2	133.933	0.141468	0.149974	0.943284	0.345536	0.62916
RSRP1	292.291	-0.52476	0.14817	-3.5416	0.000397704	0.0132637
RHD	25.8548	-0.324233	0.304917	-1.06335	0.287624	0.573185
TMEM50A	522.798	0.0192799	0.110518	0.17445	0.861512	0.947528
RHCE	6.20072	-0.24192	0.287199	-0.842342	0.399597	0.676053
TMEM57	376.381	-0.0245089	0.136065	-0.180126	0.857054	0.945413
LDLRAP1	192.355	0.215942	0.145247	1.48672	0.137089	0.386068
MAN1C1	116.353	0.2367	0.212213	1.11539	0.264683	0.548658
SEPN1	732.427	0.0531309	0.152863	0.347572	0.728162	0.887701
MTFR1L	130.167	-0.0364784	0.125147	-0.291484	0.770681	0.90642
LOC646471	50.559	-0.178996	0.149635	-1.19622	0.231612	0.511666
AUNIP	15.2653	-0.246529	0.242067	-1.01843	0.308472	0.594236
PAQR7	89.203	0.242631	0.149738	1.62037	0.105152	0.335107
STMN1	302.269	-0.025542	0.1884	-0.135573	0.892159	0.958996
MIR3917	0	NA	NA	NA	NA	NA
PAFAH2	171.912	0.214777	0.11409	1.88253	0.0597647	0.246347
EXTL1	20.0459	0.321518	0.267847	1.20038	0.229991	0.509423
SLC30A2	7.4751	0.152167	0.313498	0.485384	0.627404	0.8335
TRIM63	3.67473	0.998356	0.317102	3.14838	0.00164181	0.0312353
PDIK1L	260.619	-0.196742	0.16383	-1.20089	0.229794	0.509103
FAM110D	8.5081	0.366223	0.282407	1.29679	0.194702	0.468151
ZNF593	28.3275	0.259368	0.17057	1.5206	0.128361	0.372879
CNKSR1	114.135	0.183054	0.147558	1.24055	0.214772	0.4916
CATSPER4	2.07715	1.2032	0.319867	3.76157	0.000168852	0.00815216
LOC101928303	1.59849	1.06334	0.319557	3.32753	0.000876204	0.0217054
CEP85	178.234	0.0498123	0.177956	0.279913	0.779544	0.910859
SH3BGRL3	195.599	0.657139	0.169439	3.87832	0.000105179	0.00596719
UBXN11	111.804	0.144491	0.180075	0.802393	0.422326	0.695064
CD52	29.5573	0.926894	0.25762	3.59791	0.00032079	0.0119153
AIM1L	13.9232	0.207992	0.293308	0.709125	0.478247	0.736386
ZNF683	11.205	0.616978	0.264881	2.32926	0.0198451	0.129363
LIN28A	6.63068	0.610466	0.318643	1.91583	0.0553867	0.235802
DHDDS	224.747	0.25354	0.0947553	2.67573	0.00745663	0.0734448
LOC101928324	30.4283	-0.140491	0.197547	-0.711178	0.476974	0.735801
HMGN2	444.62	0.0184636	0.10546	0.175077	0.861019	0.947452
RPS6KA1	229.219	-0.04221	0.147062	-0.287021	0.774096	0.907912
MIR1976	0.68065	0.218155	0.288749	0.755517	0.449939	0.717363
ARID1A	1032.98	0.166263	0.0949161	1.75168	0.0798289	0.289136
PIGV	136.899	-0.127259	0.147951	-0.860142	0.389711	0.668031
ZDHHC18	185.268	0.0452371	0.142574	0.317288	0.751025	0.898752
SFN	42.9649	0.325133	0.219431	1.48171	0.138417	0.388195
GPN2	69.4165	-0.195213	0.15694	-1.24387	0.213546	0.49038
GPATCH3	47.2843	0.0807231	0.119205	0.67718	0.498292	0.749889
NR0B2	1.15386	0.702916	0.320013	2.19652	0.0280547	0.158943
NUDC	176.018	0.516899	0.131612	3.92746	8.58e-05	0.00540037
KDF1	63.2191	-0.0281049	0.16056	-0.175044	0.861045	0.947452
TRNP1	36.2801	0.300071	0.265183	1.13156	0.257819	0.541104
FAM46B	89.3325	0.3731	0.284224	1.3127	0.189285	0.461082
SLC9A1	315.166	0.360483	0.191183	1.88554	0.0593568	0.245462
WDTC1	399.879	0.0767817	0.143839	0.533803	0.593478	0.812019
TMEM222	145.5	-0.0271489	0.160499	-0.169153	0.865676	0.94818
ACTG1P20	35.9353	-0.242761	0.142924	-1.69854	0.089406	0.306703
RNU6-48P	0	NA	NA	NA	NA	NA
SYTL1	129.665	-0.0693698	0.19033	-0.364472	0.715506	0.881335
MAP3K6	191.505	0.155946	0.196744	0.792636	0.42799	0.699783
FCN3	3.58271	0.657056	0.287866	2.2825	0.0224596	0.139198
CD164L2	6.60505	0.250493	0.316983	0.79024	0.429388	0.701097
GPR3	3.39971	0.585203	0.312115	1.87496	0.0607982	0.248605
WASF2	1346.52	0.0610484	0.0925283	0.659781	0.509394	0.756699
AHDC1	231.747	0.112042	0.181468	0.617417	0.53696	0.77525
FGR	49.8815	0.629945	0.212765	2.96075	0.00306887	0.0449679
IFI6	503.593	0.12251	0.31042	0.394658	0.693095	0.869101
FAM76A	124.714	0.0154706	0.131879	0.117309	0.906615	0.96338
STX12	388.234	-0.0501325	0.138766	-0.361275	0.717894	0.882424
PPP1R8	222.2	0.130344	0.0955991	1.36344	0.172743	0.439559
SCARNA1	446.33	-0.260981	0.25604	-1.0193	0.308062	0.593715
THEMIS2	95.3192	0.434709	0.178767	2.4317	0.0150281	0.109976
RPA2	173.925	0.250316	0.106007	2.36132	0.0182102	0.123093
SMPDL3B	38.664	0.149343	0.169821	0.879418	0.379175	0.659726
XKR8	50.0812	-0.146268	0.14396	-1.01603	0.309616	0.594779
EYA3	390.018	0.0863202	0.0937685	0.920567	0.357277	0.638907
PTAFR	108.213	0.0409793	0.166932	0.245485	0.806081	0.92204
DNAJC8	212.753	0.405401	0.0819353	4.94782	7.5e-07	0.000269965
ATPIF1	209.538	0.0820188	0.148808	0.551172	0.581516	0.805374
SESN2	87.6699	0.0926705	0.163467	0.566907	0.570778	0.799514
MED18	49.5663	0.140543	0.14082	0.998031	0.318264	0.603585
PHACTR4	355.773	0.0511379	0.0807384	0.633377	0.526487	0.768151
SNHG3	160.251	-0.114766	0.207043	-0.554311	0.579366	0.80436
RCC1	172.312	0.263314	0.173939	1.51383	0.130069	0.375789
SNORA73A	12004.8	0.325468	0.281724	1.15528	0.247977	0.530787
SNORA73B	19839.1	0.40124	0.277781	1.44445	0.148613	0.403612
TRNAU1AP	92.6946	-0.0662605	0.120806	-0.548485	0.583359	0.805875
SNHG12	63.0842	0.120443	0.166873	0.721761	0.470441	0.730702
SNORD99	11.9095	0.385259	0.294756	1.30704	0.191198	0.463169
SNORA61	212.719	0.619857	0.267569	2.31662	0.0205243	0.132071
SNORA44	137.532	1.06111	0.279578	3.79541	0.000147401	0.00748435
SNORA16A	170.155	0.55744	0.284022	1.96267	0.0496847	0.221585
RAB42	11.7671	0.00378342	0.238141	0.0158873	0.987324	0.995179
TAF12	76.5458	0.251015	0.144904	1.73228	0.0832234	0.296903
RNU11	1194.56	1.06653	0.257944	4.13473	3.55e-05	0.00315146
GMEB1	75.482	0.180982	0.0997385	1.81456	0.0695914	0.267073
YTHDF2	448.844	-0.0305306	0.0962997	-0.317037	0.751216	0.898918
OPRD1	3.15034	0.0812323	0.320518	0.253441	0.799928	0.919167
EPB41	461.979	0.128345	0.112103	1.14488	0.252258	0.535461
TMEM200B	44.3	-0.251975	0.224152	-1.12412	0.260961	0.544821
SRSF4	267.033	0.131572	0.0849666	1.54851	0.121499	0.362456
MECR	80.9401	-0.00978557	0.135437	-0.0722521	0.942401	0.977599
PTPRU	194.446	-0.274666	0.168851	-1.62667	0.103806	0.333395
LOC101928460	3.30075	-0.301055	0.302482	-0.99528	0.3196	0.604525
LOC101929406	2.09014	0.951274	0.314631	3.02346	0.00249898	0.0401066
MATN1	3.36189	0.358876	0.316369	1.13436	0.256644	0.539799
MATN1-AS1	10.7105	-0.0689234	0.207175	-0.332682	0.739374	0.892861
LAPTM5	797.36	0.17786	0.182804	0.97295	0.330578	0.613989
MIR4420	1.07289	0.924707	0.317858	2.90919	0.00362372	0.0489164
SDC3	587.511	0.206271	0.17268	1.19453	0.232271	0.512457
PUM1	995.425	0.0755703	0.0663554	1.13887	0.254757	0.537904
SNORD103A	0	NA	NA	NA	NA	NA
SNORD103B	0	NA	NA	NA	NA	NA
SNORD85	8.67591	0.313686	0.252709	1.24129	0.214498	0.491344
NKAIN1	184.394	0.0833161	0.319222	0.260997	0.794095	0.917548
SNRNP40	194.386	0.160426	0.10694	1.50015	0.133576	0.381157
ZCCHC17	142.17	0.239701	0.130631	1.83495	0.0665124	0.260501
FABP3	44.3993	-0.0811835	0.169907	-0.477812	0.632784	0.836072
SERINC2	470.826	0.0983919	0.199074	0.494248	0.621131	0.829821
LINC01225	9.79704	0.238972	0.317449	0.752789	0.451577	0.718619
LINC01226	6.51632	0.363067	0.318284	1.1407	0.253995	0.537494
TINAGL1	123.802	0.161509	0.259749	0.62179	0.53408	0.773178
HCRTR1	6.48106	-0.100321	0.265025	-0.378534	0.705034	0.875337
PEF1	253.156	0.130929	0.134986	0.969947	0.332073	0.615398
COL16A1	1097.3	-0.0964925	0.207169	-0.465767	0.641382	0.840651
ADGRB2	155.871	-0.196955	0.207222	-0.950456	0.34188	0.625227
MIR4254	0.970041	0.358653	0.320146	1.12028	0.262595	0.546246
SPOCD1	32.5822	-0.0920445	0.304158	-0.302621	0.762179	0.904326
PTP4A2	2464.1	0.0785021	0.152037	0.516335	0.605621	0.820112
KHDRBS1	858.799	0.101493	0.0854196	1.18817	0.234765	0.514934
TMEM39B	48.8329	0.11566	0.158379	0.730272	0.465224	0.727696
MIR5585	1.27896	0.152957	0.312461	0.489524	0.624471	0.831933
KPNA6	998.456	0.21963	0.110955	1.97946	0.0477639	0.216792
TXLNA	825.648	0.0133048	0.112644	0.118114	0.905978	0.963188
CCDC28B	46.145	0.127414	0.137664	0.925547	0.354681	0.636832
IQCC	98.6931	-0.0720215	0.165371	-0.435514	0.663189	0.85265
DCDC2B	82.0953	-0.107433	0.173169	-0.620395	0.534998	0.773594
TMEM234	72.9962	-0.205892	0.162187	-1.26947	0.204274	0.479195
EIF3I	383.852	0.323382	0.114812	2.81662	0.00485319	0.0574909
MTMR9LP	54.8914	-0.230427	0.1828	-1.26054	0.207475	0.483345
FAM167B	7.01637	0.248204	0.27566	0.900399	0.367908	0.649414
LCK	51.4913	0.398464	0.238904	1.66788	0.0953394	0.318581
HDAC1	348.453	0.207471	0.122116	1.69896	0.0893266	0.306558
MARCKSL1	689.22	0.561608	0.179428	3.12999	0.00174813	0.0324464
FAM229A	7.54616	0.0331281	0.287458	0.115245	0.908251	0.964
TSSK3	38.3064	-0.276078	0.161908	-1.70516	0.0881653	0.304757
BSDC1	579.033	0.107752	0.107636	1.00108	0.316787	0.602213
ZBTB8B	3.37497	1.18784	0.311304	3.81568	0.000135809	0.00706428
ZBTB8A	167.665	-0.246515	0.139878	-1.76235	0.0780097	0.285331
ZBTB8OS	96.848	0.161925	0.127746	1.26755	0.204959	0.480101
RBBP4	844.934	0.135611	0.0803789	1.68715	0.0915753	0.311021
SYNC	28.1339	-0.135793	0.249909	-0.543371	0.586874	0.807752
KIAA1522	1252.59	0.0777215	0.159779	0.48643	0.626662	0.833237
YARS	258.945	0.219184	0.105951	2.06872	0.0385727	0.19194
S100PBP	403.076	-0.168318	0.0923538	-1.82254	0.0683738	0.264332
FNDC5	19.8396	-0.310525	0.174268	-1.78188	0.0747684	0.278284
HPCA	3.25699	-0.0925215	0.309721	-0.298725	0.76515	0.904326
TMEM54	67.3971	0.248596	0.214977	1.15638	0.247525	0.530395
RNF19B	216.506	0.138914	0.122285	1.13598	0.255964	0.539369
AK2	662.449	0.0695521	0.0976265	0.712431	0.476198	0.735137
AZIN2	90.8008	-0.168402	0.16844	-0.999773	0.317421	0.602746
TRIM62	90.2585	0.246836	0.142282	1.73483	0.0827704	0.295989
ZNF362	168.988	0.223119	0.130047	1.71568	0.0862215	0.301649
A3GALT2	2.26027	-0.48773	0.310877	-1.56888	0.116675	0.354199
PHC2	366.366	0.124325	0.126953	0.979302	0.327431	0.611724
MIR3605	3.88288	-0.607047	0.265425	-2.28708	0.0221912	0.138269
LOC101929464	10.859	0.0130274	0.221778	0.0587407	0.953159	0.981885
ZSCAN20	80.1591	-0.25563	0.101191	-2.52621	0.0115299	0.0941115
CSMD2	67.0041	0.0218488	0.205511	0.106315	0.915333	0.966815
HMGB4	2.7376	0.426072	0.318763	1.33664	0.181339	0.451707
CSMD2-AS1	2.35879	0.93791	0.320273	2.92847	0.00340635	0.0474079
C1orf94	1.63068	1.11445	0.307675	3.62217	0.000292141	0.0113418
MIR552	0.0542873	0.0100262	0.133058	0.0753521	0.939935	0.976446
GJB5	3.6453	0.511969	0.29786	1.71882	0.0856469	0.300661
GJB4	2.74559	0.820522	0.314267	2.61091	0.00903017	0.0823092
GJB3	5.14734	0.0183345	0.299574	0.0612019	0.951198	0.981401
GJA4	40.5658	0.729947	0.218893	3.33473	0.00085383	0.0212957
SMIM12	205.613	-0.180957	0.0966762	-1.87178	0.0612369	0.249639
DLGAP3	4.9915	0.372286	0.315403	1.18035	0.237861	0.518855
LOC653160	30.382	-0.391061	0.184004	-2.12528	0.0335634	0.17761
ZMYM6NB	87.502	-0.0869372	0.149437	-0.581765	0.560725	0.79225
ZMYM6	237.833	-0.41005	0.151658	-2.70378	0.00685564	0.0697582
ZMYM1	221.266	-0.592644	0.172133	-3.44295	0.0005754	0.0167568
SFPQ	1710.16	-0.17027	0.103086	-1.65172	0.0985911	0.324612
ZMYM4	905.018	-0.00797773	0.107251	-0.0743837	0.940705	0.976929
KIAA0319L	682.806	0.143192	0.117263	1.22112	0.222039	0.500387
NCDN	194.857	0.0925211	0.162637	0.568883	0.569436	0.798254
TFAP2E	18.2433	0.231066	0.183999	1.2558	0.20919	0.485702
PSMB2	280.29	0.316048	0.127321	2.48229	0.013054	0.101184
C1orf216	124.771	0.102392	0.118372	0.865001	0.387038	0.6662
CLSPN	64.0287	0.218384	0.233677	0.934553	0.350019	0.632794
2004-08-01	452.974	-0.13514	0.116792	-1.1571	0.247232	0.529946
2001-08-01	638.071	0.0878599	0.0847742	1.0364	0.300016	0.586214
2003-08-01	305.713	-0.235041	0.088124	-2.66716	0.00764962	0.0745977
TEKT2	7.82943	-0.0304975	0.308967	-0.0987079	0.92137	0.969384
ADPRHL2	101.372	0.152488	0.169646	0.898864	0.368725	0.650226
COL8A2	553.053	-0.243587	0.204725	-1.18982	0.234115	0.514236
TRAPPC3	228.944	0.232122	0.0949262	2.44529	0.0144736	0.107415
MAP7D1	259.889	0.155381	0.139102	1.11703	0.263982	0.547916
THRAP3	887.054	0.296743	0.0910116	3.2605	0.00111216	0.0244952
SH3D21	131.879	-0.167563	0.189528	-0.884108	0.376638	0.657726
EVA1B	133.046	-0.124122	0.209747	-0.591771	0.554004	0.787772
STK40	202.327	0.0691223	0.149263	0.463091	0.643299	0.841607
LSM10	45.9026	0.208314	0.169993	1.22543	0.220415	0.498954
OSCP1	57.5728	-0.114939	0.144414	-0.795901	0.426089	0.698053
MRPS15	79.1586	0.194527	0.12638	1.53922	0.12375	0.365808
CSF3R	132.134	0.173847	0.232472	0.747819	0.454569	0.720113
GRIK3	191.72	-0.123326	0.288481	-0.4275	0.669015	0.855315
MIR4255	0.137341	0.0649854	0.167847	0.38717	0.698631	0.872249
LINC01137	24.7619	-0.0821622	0.218546	-0.375949	0.706955	0.876359
ZC3H12A	133.73	0.764108	0.159775	4.78239	1.73e-06	0.000486914
MIR6732	1.27514	0.233783	0.312375	0.748404	0.454216	0.719897
MEAF6	430.335	-0.104706	0.163037	-0.642225	0.520727	0.764051
MIR5581	16.4502	-0.00488335	0.275218	-0.0177436	0.985843	0.994488
SNIP1	169.696	-0.0146268	0.125133	-0.11689	0.906947	0.963511
DNALI1	164.831	0.0828187	0.19392	0.427077	0.669323	0.855441
GNL2	217.459	0.0619768	0.0914153	0.677969	0.497791	0.749629
RSPO1	20.3687	0.209922	0.304539	0.68931	0.490628	0.745473
C1orf109	104.045	0.109348	0.100398	1.08914	0.276092	0.560746
CDCA8	50.3054	0.34184	0.244183	1.39993	0.161533	0.423932
EPHA10	84.5795	-0.0318517	0.22818	-0.13959	0.888984	0.957335
MANEAL	100.986	0.0775263	0.239531	0.323658	0.746197	0.896027
YRDC	75.054	0.0074955	0.139041	0.0539085	0.957008	0.983502
C1orf122	78.2397	0.0958228	0.18448	0.519422	0.603466	0.818693
MTF1	304.935	-0.0462083	0.0907945	-0.508933	0.610799	0.823216
INPP5B	228.65	0.0588715	0.123856	0.475324	0.634556	0.837326
SF3A3	336.066	0.186999	0.0751356	2.48882	0.0128167	0.0999815
FHL3	74.953	0.137657	0.163957	0.839591	0.401138	0.677503
UTP11L	100.38	0.0228498	0.1163	0.196473	0.84424	0.939084
POU3F1	3.54423	-0.240862	0.309373	-0.778548	0.436246	0.706514
MIR3659	0.413321	0.131698	0.292686	0.449964	0.652736	0.847568
LINC01343	1.17591	0.900282	0.304599	2.95563	0.00312029	0.0453149
RRAGC	244.797	-0.355902	0.126462	-2.8143	0.00488839	0.0578006
MYCBP	1.05275	-0.816154	0.31099	-2.62437	0.00868093	0.0804515
GJA9-MYCBP	5.53228	-0.047136	0.277797	-0.169678	0.865263	0.94818
GJA9	0	NA	NA	NA	NA	NA
RHBDL2	30.3721	-0.0372849	0.196984	-0.189279	0.849874	0.941662
AKIRIN1	357.948	-0.140022	0.1227	-1.14117	0.253799	0.537292
NDUFS5	203.001	0.530919	0.137774	3.85355	0.000116415	0.00638035
MACF1	5116.46	-0.111999	0.127442	-0.87883	0.379493	0.660146
KIAA0754	357.056	-0.171919	0.118422	-1.45176	0.146569	0.400592
BMP8A	144.025	-0.39293	0.185027	-2.12363	0.0337009	0.177872
PPIEL	48.9036	0.223554	0.168469	1.32697	0.184518	0.455324
PABPC4	422.987	0.0431601	0.103601	0.4166	0.676971	0.860064
LOC101929516	24.0388	-0.236466	0.215494	-1.09732	0.272502	0.556598
SNORA55	89.3959	0.56664	0.298637	1.89742	0.0577729	0.242523
HEYL	118.405	0.24731	0.19865	1.24495	0.213149	0.490109
NT5C1A	1.58839	0.2807	0.320556	0.875666	0.381211	0.661648
HPCAL4	5.53546	0.480639	0.308106	1.55998	0.118765	0.357652
PPIE	135.901	0.0364182	0.118527	0.307255	0.758649	0.902492
BMP8B	37.3618	-0.427484	0.211978	-2.01664	0.0437326	0.205734
OXCT2	1.92301	-0.162136	0.320318	-0.506174	0.612734	0.82453
TRIT1	154.234	-0.0363102	0.112408	-0.323022	0.746678	0.896281
MYCL	58.3579	0.2534	0.240411	1.05403	0.29187	0.577677
MFSD2A	24.554	0.0417234	0.260492	0.160172	0.872746	0.94949
CAP1	1246.22	0.23974	0.0853464	2.80903	0.00496914	0.0582967
PPT1	1206.42	0.121536	0.139264	0.8727	0.382827	0.663099
RLF	384.111	-0.356645	0.136143	-2.61964	0.00880222	0.0809979
TMCO2	0.886426	0.200177	0.319319	0.626887	0.530733	0.770879
ZMPSTE24	560.412	-0.181814	0.180038	-1.00986	0.312562	0.598001
COL9A2	73.3163	0.215415	0.246426	0.874159	0.382032	0.662306
SMAP2	333.009	0.612727	0.139543	4.39095	1.13e-05	0.00161436
ZFP69B	31.1603	-0.0440274	0.199249	-0.220967	0.825118	0.93225
ZFP69	59.2235	-0.206083	0.145613	-1.41528	0.156987	0.416785
EXO5	50.1986	0.0707487	0.131779	0.536874	0.591354	0.810518
ZNF684	25.3338	-0.351429	0.170838	-2.0571	0.0396771	0.194952
RIMS3	70.0046	-0.331596	0.197833	-1.67614	0.0937106	0.314875
NFYC-AS1	34.4176	-0.242803	0.209524	-1.15883	0.246525	0.529186
NFYC	191.402	0.195778	0.0950326	2.06012	0.0393873	0.194387
MIR30E	2.45331	-0.360276	0.301714	-1.1941	0.23244	0.512683
MIR30C1	2.12628	0.331845	0.320026	1.03693	0.299767	0.585998
KCNQ4	9.65054	0.816434	0.272809	2.99269	0.00276531	0.0423925
CITED4	110.607	0.540136	0.296262	1.82317	0.0682772	0.264122
CTPS1	204.621	0.0551432	0.152129	0.362476	0.716996	0.881811
SLFNL1-AS1	42.1059	0.102886	0.143116	0.718898	0.472204	0.731979
SLFNL1	14.5874	-0.448377	0.222703	-2.01335	0.0440782	0.206523
SCMH1	310.236	-0.0448916	0.122885	-0.365313	0.714878	0.880922
FOXO6	20.3173	0.00249194	0.267704	0.00930856	0.992573	0.997362
EDN2	11.5619	0.420451	0.311603	1.34932	0.177235	0.445354
HIVEP3	387.633	0.0708699	0.164713	0.430264	0.667003	0.854669
GUCA2B	0.357373	0.270901	0.219967	1.23155	0.218117	0.495879
GUCA2A	0.27941	0.168564	0.171842	0.980926	0.326629	0.610965
FOXJ3	665.393	-0.0525515	0.11825	-0.44441	0.656747	0.849238
RIMKLA	59.2678	-0.0603014	0.277057	-0.21765	0.827702	0.9336
ZMYND12	18.3429	0.0845884	0.254348	0.332569	0.739459	0.892861
PPCS	244.293	0.0477365	0.111209	0.42925	0.667741	0.854964
CCDC30	47.5831	0.129439	0.18059	0.716757	0.473524	0.733148
PPIH	78.5302	0.264716	0.115727	2.28742	0.0221711	0.138177
YBX1	462.75	0.359261	0.13935	2.57812	0.00993408	0.0868333
CLDN19	8.11764	0.376945	0.318601	1.18312	0.23676	0.51762
P3H1	148.261	-0.155045	0.142648	-1.0869	0.277079	0.561887
C1orf50	37.8314	-0.107166	0.115165	-0.930544	0.352089	0.634427
LOC100129924	5.67738	0.713552	0.281456	2.53522	0.0112377	0.0930001
SVBP	31.7384	0.1428	0.155419	0.918811	0.358195	0.63983
ERMAP	155.464	0.156667	0.118402	1.32318	0.185775	0.456643
ZNF691	61.7924	-0.344917	0.136223	-2.532	0.0113414	0.093288
LOC339539	1.90416	0.773349	0.320313	2.41435	0.0157632	0.113183
SLC2A1	275.811	-0.00647826	0.200165	-0.0323646	0.974181	0.989843
SLC2A1-AS1	9.50415	0.0319339	0.283954	0.112462	0.910457	0.964919
FAM183A	5.08054	0.117223	0.316984	0.369806	0.711527	0.878998
EBNA1BP2	103.78	0.499095	0.145323	3.43439	0.000593883	0.0170042
MIR6733	0.184263	0.0355831	0.19233	0.185011	0.853221	0.943344
CFAP57	29.7505	0.198464	0.197558	1.00459	0.315096	0.600116
TMEM125	80.6841	-0.0323071	0.200524	-0.161113	0.872004	0.949237
C1orf210	34.5708	0.424692	0.204006	2.08177	0.0373638	0.18889
TIE1	101.447	0.479347	0.169092	2.83483	0.00458501	0.0556829
MPL	12.9124	0.255357	0.214655	1.18962	0.234196	0.514236
CDC20	44.7699	0.0943056	0.259345	0.36363	0.716134	0.881517
ELOVL1	201.953	0.196728	0.152385	1.291	0.196705	0.470354
MIR6734	0.160668	0.0462533	0.188391	0.245517	0.806056	0.92204
MED8	151.532	-0.138084	0.0829328	-1.66501	0.09591	0.319617
SZT2	805.223	-0.00700159	0.13912	-0.0503277	0.959861	0.984849
MIR6735	0.147531	-0.0183878	0.152978	-0.120199	0.904326	0.962844
HYI	0	NA	NA	NA	NA	NA
PTPRF	2835.49	0.0562362	0.168052	0.334635	0.737901	0.892187
KDM4A	461.349	0.0606852	0.0919562	0.659935	0.509295	0.75664
KDM4A-AS1	23.5864	-0.341535	0.205008	-1.66596	0.0957212	0.319321
ST3GAL3	63.9026	0.120183	0.15429	0.778944	0.436013	0.706255
LOC101929592	5.69086	-0.219105	0.273455	-0.801248	0.422988	0.69536
MIR6079	3.79675	0.0160855	0.291038	0.0552694	0.955924	0.983004
ARTN	14.8573	-0.0238111	0.275771	-0.0863438	0.931193	0.97403
IPO13	178.185	-0.0763991	0.138298	-0.552425	0.580657	0.805087
DPH2	121.569	-0.0653454	0.149474	-0.437168	0.66199	0.851963
ATP6V0B	354.622	0.0866886	0.18735	0.462709	0.643573	0.841793
B4GALT2	155.134	0.04621	0.155293	0.297567	0.766033	0.90434
CCDC24	67.3587	0.0764787	0.194649	0.392906	0.694389	0.869902
SLC6A9	67.8244	0.0640697	0.203777	0.314411	0.753209	0.900184
KLF17	2.30645	0.481288	0.320504	1.50166	0.133186	0.380531
DMAP1	80.1303	0.19072	0.133841	1.42498	0.154164	0.41233
ERI3	176.495	0.118118	0.11832	0.998295	0.318137	0.603387
ERI3-IT1	48.863	0.0869248	0.16264	0.534461	0.593023	0.811872
RNF220	178.138	0.278292	0.0984216	2.82755	0.0046906	0.0563755
MIR5584	0.268714	0.120941	0.187888	0.643683	0.519781	0.763513
TMEM53	20.6987	0.332059	0.164826	2.0146	0.0439467	0.206232
C1orf228	18.252	-0.0415154	0.243316	-0.170624	0.86452	0.94818
RNU5F-1	19.9617	0.83516	0.293054	2.84985	0.00437393	0.0543867
RNU5D-1	60.1469	0.253401	0.311555	0.81334	0.416023	0.69002
KIF2C	62.2228	0.0414956	0.232352	0.178589	0.85826	0.946176
RPS8	2264.19	0.239706	0.184044	1.30244	0.192765	0.465246
SNORD55	12.6871	0.828561	0.30685	2.70021	0.00692951	0.070267
SNORD46	103.103	0.465466	0.297908	1.56245	0.118182	0.356898
SNORD38A	6.60887	0.604296	0.304155	1.98681	0.046944	0.214401
SNORD38B	5.16004	0.0394472	0.267174	0.147646	0.882622	0.953964
BEST4	5.80566	0.267542	0.296259	0.903068	0.36649	0.647689
PLK3	121.388	0.377428	0.179952	2.09738	0.0359602	0.185187
TCTEX1D4	27.6177	0.146414	0.220313	0.664574	0.506323	0.754904
BTBD19	51.4505	0.307392	0.196422	1.56496	0.117593	0.355972
PTCH2	163.279	0.230932	0.268103	0.861353	0.389044	0.667799
EIF2B3	122.661	0.0738335	0.11453	0.644664	0.519145	0.76315
HECTD3	209.006	0.290391	0.130319	2.22832	0.0258593	0.151191
UROD	136.405	0.412324	0.121464	3.39461	0.00068726	0.018673
ZSWIM5	71.2293	-0.0113918	0.248803	-0.0457864	0.963481	0.985981
LINC01144	5.5266	-0.224109	0.25555	-0.876967	0.380505	0.66105
HPDL	8.15212	0.0514939	0.267889	0.192221	0.847569	0.940516
MUTYH	57.0118	0.145542	0.169604	0.858124	0.390824	0.668623
TOE1	38.166	-0.157652	0.178128	-0.88505	0.37613	0.65743
TESK2	115.622	0.291349	0.181863	1.60203	0.10915	0.34188
CCDC163P	14.4185	0.0676155	0.25091	0.269481	0.787559	0.914576
MMACHC	50.9183	-0.133741	0.174556	-0.766176	0.443572	0.712504
PRDX1	892.113	0.484337	0.176617	2.7423	0.00610101	0.0654155
AKR1A1	299.846	0.302113	0.115785	2.60927	0.00907353	0.0825572
NASP	235.241	0.223952	0.106492	2.10301	0.0354652	0.183468
CCDC17	33.5338	-0.572143	0.199658	-2.86561	0.004162	0.0529205
GPBP1L1	990.682	-0.0764213	0.0868896	-0.879522	0.379118	0.659673
RPS15AP10	37.0001	-0.382648	0.20018	-1.91152	0.0559378	0.237278
TMEM69	103.962	-0.0430797	0.135201	-0.318634	0.750004	0.898199
IPP	198.336	-0.0799329	0.116981	-0.683299	0.494418	0.748084
MAST2	499.448	-0.11243	0.138557	-0.811437	0.417115	0.690639
PIK3R3	958.929	0.0224175	0.163215	0.137349	0.890755	0.958091
LOC101929626	1.73667	-0.430156	0.319242	-1.34743	0.177841	0.446527
TSPAN1	229.997	-0.0156659	0.299515	-0.0523044	0.958286	0.984238
POMGNT1	374.022	0.0672163	0.127546	0.526998	0.598195	0.815504
LURAP1	15.9841	0.0446256	0.271722	0.164232	0.869548	0.94818
RAD54L	48.9186	0.0127936	0.203719	0.0628003	0.949926	0.98096
LRRC41	323.709	0.0261381	0.122563	0.213262	0.831122	0.934145
UQCRH	242	0.374957	0.132586	2.82803	0.00468361	0.0563445
NSUN4	241.435	0.10617	0.0991214	1.07111	0.284122	0.569715
FAAH	169.417	0.117539	0.183155	0.641748	0.521037	0.764273
FAAHP1	9.75405	0.205823	0.285119	0.721882	0.470367	0.730702
LINC01398	4.85171	0.209106	0.307724	0.679526	0.496805	0.749197
DMBX1	3.6635	0.52202	0.320182	1.63039	0.10302	0.332021
MKNK1-AS1	23.3551	0.133573	0.163695	0.815987	0.414508	0.688689
KNCN	1.73386	1.05732	0.309697	3.41405	0.000640058	0.0177879
MKNK1	158.208	0.148754	0.110497	1.34622	0.178232	0.447155
MOB3C	123.694	0.084267	0.130503	0.645711	0.518466	0.762723
ATPAF1	193.224	0.179961	0.128893	1.3962	0.162654	0.425326
TEX38	4.39194	0.0801456	0.274255	0.29223	0.770111	0.906246
EFCAB14-AS1	9.35044	-0.0740277	0.242159	-0.305698	0.759835	0.903151
EFCAB14	1239.08	0.0674952	0.0891732	0.756901	0.449109	0.716549
CYP4B1	76.8652	0.204764	0.282152	0.725722	0.468009	0.729427
CYP4Z2P	249.704	-0.0885719	0.315633	-0.280617	0.779004	0.910841
CYP4A11	9.07143	0.475901	0.303198	1.5696	0.116508	0.353944
CYP4X1	206.729	-0.0355174	0.29943	-0.118617	0.905579	0.963188
CYP4Z1	147.687	-0.0558682	0.317922	-0.175729	0.860507	0.947218
CYP4A22	14.1426	-0.134296	0.269328	-0.498635	0.618037	0.828287
LINC00853	2.9894	0.432372	0.312001	1.38581	0.165806	0.42997
PDZK1IP1	26.9753	0.385657	0.269651	1.43021	0.152657	0.409672
TAL1	38.508	0.491073	0.199925	2.45629	0.014038	0.105357
STIL	98.2607	-0.327961	0.199928	-1.64039	0.100923	0.328832
CMPK1	999.254	-0.115682	0.189202	-0.611421	0.540921	0.777879
LINC01389	13.8865	0.0395979	0.220525	0.179562	0.857496	0.945656
FOXE3	1.10787	0.51872	0.317399	1.63428	0.102199	0.330862
FOXD2-AS1	13.1117	-0.281958	0.238688	-1.18128	0.23749	0.518329
FOXD2	24.2163	-0.135792	0.246726	-0.550377	0.582061	0.805693
TRABD2B	45.7615	-0.211725	0.235756	-0.898067	0.36915	0.650662
SKINTL	5.77391	0.615198	0.306563	2.00676	0.0447752	0.208602
SLC5A9	51.3328	0.122433	0.234043	0.523122	0.600889	0.81701
SPATA6	235.832	-0.0933636	0.193452	-0.482618	0.629367	0.834235
AGBL4	18.6652	0.331612	0.20043	1.65451	0.0980241	0.323665
BEND5	15.7173	0.173359	0.236809	0.732064	0.464129	0.727251
LOC101929721	2.28703	0.590546	0.317216	1.86165	0.0626522	0.252268
AGBL4-IT1	7.70494	0.227381	0.273943	0.830031	0.406521	0.682614
ELAVL4	7.36859	0.680102	0.312553	2.17596	0.0295585	0.164185
DMRTA2	0.842404	0.716359	0.283894	2.52334	0.0116247	0.0944424
FAF1	279.001	-0.019839	0.0789889	-0.251161	0.801689	0.920105
CDKN2C	51.2398	0.147822	0.16054	0.920778	0.357166	0.638907
MIR4421	0.121255	-0.0212792	0.164011	-0.129743	0.89677	0.960879
MIR6500	0.41725	0.252196	0.261333	0.96504	0.334525	0.617981
C1orf185	1.68706	0.83555	0.320564	2.6065	0.00914726	0.0829326
RNF11	759.217	-0.327265	0.175586	-1.86385	0.0623425	0.251742
TTC39A	585.609	-0.110804	0.203419	-0.544708	0.585954	0.807423
TTC39A-AS1	19.1076	-0.539394	0.245241	-2.19944	0.0278467	0.158161
EPS15	998.442	-0.0327821	0.120824	-0.27132	0.786145	0.913598
OSBPL9	530.529	-0.0342441	0.125832	-0.272141	0.785513	0.913226
NRD1	762.7	-0.0664357	0.0861654	-0.771026	0.440692	0.710468
MIR761	0.209422	-0.0366538	0.211086	-0.173643	0.862146	0.947847
RAB3B	98.4168	-0.257322	0.294166	-0.874748	0.381711	0.66203
TXNDC12	228.505	0.0764306	0.104953	0.728236	0.466469	0.727994
KTI12	0	NA	NA	NA	NA	NA
TXNDC12-AS1	10.1928	-0.512381	0.23367	-2.19276	0.028325	0.159898
BTF3L4	412.871	-0.103338	0.157529	-0.655992	0.511829	0.75787
ZFYVE9	304.62	-0.0832021	0.133752	-0.622061	0.533902	0.773096
CC2D1B	226.854	-0.0275912	0.107207	-0.257364	0.796898	0.919117
ORC1	19.4571	0.0324208	0.241371	0.134319	0.89315	0.959044
PRPF38A	236.289	0.211748	0.124067	1.70672	0.0878739	0.304188
ZCCHC11	343.974	-0.309223	0.176786	-1.74914	0.0802668	0.290337
GPX7	52.3602	-0.161154	0.184279	-0.874511	0.38184	0.662093
FAM159A	4.20262	-0.130908	0.313417	-0.41768	0.676181	0.859646
COA7	82.2999	0.015224	0.150096	0.101428	0.919211	0.96834
ZYG11B	629.889	-0.13416	0.12092	-1.1095	0.267215	0.550978
ZYG11A	60.9308	-0.137917	0.253031	-0.545058	0.585714	0.807314
ECHDC2	215.801	0.0242765	0.173993	0.139526	0.889035	0.957335
SCP2	599.229	-0.00805381	0.163361	-0.0493007	0.96068	0.985219
MIR1273F	0.479135	-0.0317131	0.289256	-0.109637	0.912697	0.965468
MIR5095	0.0253133	0.0218564	0.133058	0.164263	0.869524	0.94818
MIR1273G	0.770269	-0.0515631	0.314606	-0.163898	0.869812	0.948386
PODN	341.489	-0.0502492	0.221046	-0.227324	0.820172	0.929871
SLC1A7	21.5237	-0.133325	0.248977	-0.535493	0.592309	0.811261
CPT2	114.304	0.0922803	0.119933	0.769433	0.441636	0.710961
C1orf123	102.854	-0.000623486	0.0979514	-0.00636526	0.994921	0.998189
MAGOH	69.3331	0.672314	0.183385	3.66613	0.000246251	0.0102833
LOC100507564	2.74812	-0.0325481	0.308656	-0.105451	0.916018	0.967139
LRP8	75.6409	-0.229052	0.19953	-1.14796	0.250985	0.533873
LOC105378732	1.33301	0.872649	0.317188	2.7512	0.00593772	0.064231
SLC25A3P1	0.262096	0.218067	0.232323	0.938636	0.347918	0.630859
DMRTB1	0.731394	0.457106	0.241757	1.89076	0.058656	0.244213
GLIS1	7.98865	0.105342	0.289585	0.363769	0.716031	0.881492
NDC1	332.083	-0.233871	0.155296	-1.50597	0.132076	0.378927
YIPF1	174.757	-0.034401	0.11108	-0.309695	0.756793	0.901622
DIO1	78.2945	-0.0606668	0.308811	-0.196453	0.844256	0.939084
HSPB11	78.8582	0.101689	0.169855	0.598682	0.549385	0.784528
LRRC42	97.907	0.128769	0.110517	1.16515	0.243957	0.526527
LDLRAD1	6.84408	0.387401	0.315264	1.22881	0.219141	0.497218
TMEM59	1043.04	-0.0440525	0.159796	-0.27568	0.782794	0.911986
TCEANC2	101.094	0.119278	0.112044	1.06456	0.287076	0.572582
MIR4781	0.099688	0.0144612	0.158121	0.0914565	0.92713	0.972399
CDCP2	1.5273	0.530118	0.320178	1.6557	0.0977832	0.323118
CYB5RL	58.881	-0.0873103	0.170684	-0.511531	0.608979	0.82201
MRPL37	140.321	0.241044	0.0927662	2.59841	0.00936568	0.0840183
SSBP3	189.072	0.436003	0.113331	3.84717	0.000119489	0.00646559
SSBP3-AS1	32.7632	0.194341	0.193303	1.00537	0.314717	0.59993
ACOT11	28.4318	0.0932006	0.205429	0.453688	0.650054	0.846024
FAM151A	4.33328	0.885335	0.291319	3.03906	0.00237319	0.0387293
MROH7	0.734703	-0.276089	0.315374	-0.875431	0.381339	0.661734
MROH7-TTC4	0.826126	0.498671	0.304782	1.63616	0.101807	0.330244
TTC4	1.85335	0.242119	0.307503	0.787371	0.431064	0.702443
PARS2	39.2671	0.00924366	0.143624	0.0643602	0.948683	0.98017
TTC22	25.4476	0.0618843	0.285468	0.216782	0.828378	0.933992
C1orf177	5.74058	-0.138205	0.296294	-0.466447	0.640895	0.840292
DHCR24	1931.34	0.175151	0.179525	0.975635	0.329245	0.612829
TMEM61	3.44931	0.213795	0.294225	0.726638	0.467448	0.729015
BSND	1.1049	0.336251	0.300259	1.11987	0.262769	0.546246
PCSK9	7.60494	-0.277644	0.284178	-0.977007	0.328565	0.612448
USP24	1277.3	-0.108293	0.098379	-1.10077	0.270996	0.555119
LOC100507634	2.96077	0.682276	0.314566	2.16894	0.030087	0.166037
MIR4422	0.275317	0.131915	0.173209	0.761591	0.446304	0.714333
PPAP2B	445.146	0.203083	0.16672	1.21811	0.223183	0.501592
PRKAA2	358.181	-0.0205865	0.285936	-0.0719968	0.942604	0.977629
C1orf168	58.6091	-0.19813	0.2895	-0.684387	0.493731	0.747902
C8A	3.38089	1.10657	0.308497	3.58697	0.000334546	0.0121113
C8B	3.20345	0.918328	0.316577	2.9008	0.00372209	0.0496408
DAB1	6.08333	0.513327	0.305172	1.68209	0.0925515	0.312608
DAB1-AS1	1.60283	0.541019	0.309326	1.74903	0.0802861	0.290358
OMA1	229.733	-0.0974664	0.179271	-0.543683	0.58666	0.807691
TACSTD2	874.765	0.397302	0.181005	2.19498	0.0281651	0.159392
MYSM1	873.159	-0.174641	0.153243	-1.13963	0.254439	0.537774
JUN	831.575	2.05274	0.185415	11.071	1.73e-28	5.53e-25
LINC01135	5.3543	-0.0364617	0.277805	-0.131249	0.895578	0.960197
LINC01358	2.36781	-0.0768159	0.320582	-0.239614	0.81063	0.925107
HSD52	0.739303	0.570635	0.292937	1.94798	0.0514173	0.226648
FGGY	102.799	0.224581	0.140088	1.60314	0.108904	0.341406
MIR4711	0.844142	0.0324408	0.284005	0.114226	0.909059	0.964376
LOC101926944	1.6756	0.258595	0.320396	0.80711	0.419603	0.693097
HOOK1	487.153	-0.372499	0.209511	-1.77795	0.0754122	0.280027
CYP2J2	42.2366	-0.046044	0.299325	-0.153826	0.877747	0.951675
C1orf87	2.78058	0.797452	0.314702	2.53399	0.0112772	0.0931404
LOC101926964	3.67665	1.13352	0.310172	3.6545	0.000257681	0.0105131
NFIA-AS2	4.41797	0.483223	0.307179	1.5731	0.115696	0.352316
NFIA	1880.25	0.0325941	0.174263	0.18704	0.851629	0.942605
NFIA-AS1	41.9588	-0.0349969	0.215388	-0.162483	0.870926	0.948814
MGC34796	2.54592	0.0612661	0.309241	0.198118	0.842953	0.93843
TM2D1	143.573	-0.199341	0.158931	-1.25426	0.209746	0.486551
INADL	1897.82	-0.250088	0.141193	-1.77125	0.0765197	0.282089
MIR3116-1	0.0139016	0.0100262	0.133058	0.0753521	0.939935	0.976446
MIR3116-2	0	NA	NA	NA	NA	NA
L1TD1	12.433	0.135832	0.314735	0.431577	0.666049	0.854303
KANK4	104.899	-0.148696	0.228807	-0.649875	0.515773	0.760757
USP1	365.733	-0.287443	0.185624	-1.54852	0.121496	0.362456
DOCK7	462.39	-0.229568	0.123478	-1.85918	0.0630015	0.252838
ANGPTL3	47.3508	-0.16943	0.2192	-0.772945	0.439555	0.709444
ATG4C	93.4739	-0.21079	0.186217	-1.13196	0.257652	0.540886
LINC00466	3.82368	0.728903	0.320347	2.27536	0.0228845	0.140573
FOXD3-AS1	5.01022	0.257575	0.320392	0.803936	0.421434	0.694405
FOXD3	0.926801	0.509421	0.311108	1.63744	0.101538	0.329766
MIR6068	0.0363249	0.00411104	0.133058	0.0308967	0.975352	0.989843
ALG6	139.718	-0.459331	0.152227	-3.01741	0.00254946	0.0405689
ITGB3BP	63.1188	-0.361378	0.177742	-2.03316	0.0420363	0.201141
EFCAB7	71.5489	-0.27538	0.173769	-1.58475	0.113023	0.348065
DLEU2L	22.1361	-0.412804	0.246811	-1.67255	0.094416	0.316413
PGM1	191.597	0.116438	0.139627	0.833927	0.404322	0.680633
ROR1	73.3982	-0.0738633	0.17714	-0.416976	0.676696	0.859884
ROR1-AS1	17.9634	0.115126	0.263803	0.436407	0.662541	0.852201
UBE2U	1.27741	1.00668	0.311419	3.23255	0.00122692	0.0260259
CACHD1	185.301	0.151919	0.206614	0.735281	0.462169	0.726158
MIR4794	1.14825	0.302511	0.308768	0.979737	0.327216	0.611462
RAVER2	165.656	-0.168214	0.185214	-0.908216	0.363764	0.645131
JAK1	1324.91	0.0198969	0.114294	0.174086	0.861798	0.947768
LINC01359	55.6693	-0.401404	0.258026	-1.55567	0.119786	0.359542
MIR3671	12.6141	-0.821761	0.287583	-2.85748	0.00427022	0.0536973
MIR101-1	1.49991	-0.528758	0.320546	-1.64955	0.0990341	0.3254
AK4	296.273	-0.0489387	0.259403	-0.188658	0.850361	0.941854
DNAJC6	40.8337	0.606691	0.229816	2.6399	0.00829305	0.0781395
LEPROT	753.723	-0.143351	0.120864	-1.18605	0.235603	0.516109
LEPR	248.497	-0.0543512	0.258978	-0.209868	0.833771	0.934145
PDE4B	289.585	0.270726	0.227943	1.18769	0.234955	0.51522
LOC101927139	12.7144	0.0349349	0.30842	0.113271	0.909816	0.964642
SGIP1	151.26	-0.417847	0.201026	-2.07857	0.0376567	0.189545
MIR3117	4.83823	-0.0226145	0.298061	-0.0758722	0.939521	0.976446
TCTEX1D1	7.73296	0.396339	0.284371	1.39374	0.163396	0.426128
INSL5	0.879835	0.467988	0.314312	1.48893	0.136506	0.385041
WDR78	83.1263	-0.029716	0.210307	-0.141298	0.887635	0.956952
MIER1	565.525	-0.295814	0.190362	-1.55395	0.120195	0.360012
SLC35D1	432.477	-0.118766	0.124838	-0.951355	0.341424	0.62473
C1orf141	1.75798	1.13916	0.317418	3.58884	0.000332147	0.0121113
IL23R	4.89176	0.76889	0.315607	2.43623	0.0148414	0.109048
IL12RB2	31.719	-0.0583166	0.226156	-0.25786	0.796515	0.918882
SERBP1	1351.54	-0.219025	0.165535	-1.32313	0.185791	0.456643
GADD45A	54.9654	0.35713	0.227117	1.57244	0.115847	0.352735
GNG12	1146.57	-0.188179	0.177763	-1.0586	0.289784	0.575869
GNG12-AS1	27.1544	-0.093082	0.258562	-0.359998	0.718848	0.883087
DIRAS3	12.1199	-0.0528152	0.305783	-0.172721	0.862871	0.94794
WLS	258.929	0.11195	0.196328	0.57022	0.568529	0.798007
MIR1262	2.69857	-0.40739	0.316266	-1.28813	0.197702	0.471534
RPE65	4.08224	1.31127	0.319653	4.10217	4.09e-05	0.0034386
DEPDC1	54.6155	-0.284969	0.274645	-1.03759	0.299461	0.585622
DEPDC1-AS1	1.46808	0.544694	0.301847	1.80454	0.0711468	0.27036
LRRC7	7.03584	1.03635	0.318312	3.25577	0.00113084	0.0247699
PIN1P1	0.602055	0.412418	0.250115	1.64892	0.0991644	0.325632
LRRC40	124.767	-0.32452	0.188361	-1.72287	0.0849123	0.29958
SRSF11	779.777	-0.533098	0.128114	-4.16113	3.17e-05	0.00294194
ANKRD13C	298.946	-0.0805827	0.143479	-0.561634	0.574366	0.801626
HHLA3	11.8712	0.804029	0.233399	3.44486	0.000571347	0.0167046
CTH	23.8415	0.12273	0.211346	0.580706	0.561438	0.792743
LOC101927244	6.16275	0.338605	0.315004	1.07492	0.28241	0.567799
PTGER3	561.604	-0.139666	0.27828	-0.501888	0.615746	0.826561
ZRANB2-AS1	22.3047	-0.701907	0.279649	-2.50996	0.0120745	0.0964601
ZRANB2	528.179	-0.411131	0.190137	-2.16228	0.0305965	0.167378
MIR186	21.1853	-0.735759	0.291458	-2.52441	0.0115893	0.0944152
ZRANB2-AS2	8.55333	0.509803	0.274164	1.85949	0.0629584	0.252795
NEGR1	189.899	-0.208135	0.232077	-0.896835	0.369807	0.651294
NEGR1-IT1	2.14601	0.806962	0.320291	2.51946	0.0117534	0.0951447
LINC01360	3.07009	1.10047	0.309931	3.5507	0.000384213	0.0129576
LRRIQ3	9.28549	-0.000315846	0.308337	-0.00102435	0.999183	0.999613
FPGT-TNNI3K	0.741743	0.103015	0.28733	0.358527	0.719949	0.883717
FPGT	215.785	-0.407106	0.226899	-1.79422	0.0727783	0.274109
TNNI3K	0.944727	0.274186	0.320464	0.855591	0.392224	0.669792
ERICH3	25.9884	0.190677	0.310227	0.614639	0.538793	0.776611
ERICH3-AS1	5.24331	0.73733	0.319308	2.30915	0.0209351	0.133652
CRYZ	188.388	-0.165896	0.204353	-0.811807	0.416903	0.690512
TYW3	169.028	0.0677487	0.161549	0.41937	0.674946	0.858686
LHX8	2.39698	1.0497	0.316587	3.31568	0.00091419	0.0221885
SLC44A5	105.351	-0.172223	0.275457	-0.625226	0.531823	0.771437
ACADM	216.937	-0.0719377	0.14622	-0.491983	0.622731	0.830984
DLSTP1	50.7717	-0.501065	0.164246	-3.0507	0.00228305	0.037937
RABGGTB	384.222	-0.0593251	0.139686	-0.424705	0.671052	0.856248
SNORD45C	11.1746	-0.981555	0.252083	-3.89378	9.87e-05	0.00573433
SNORD45A	30.2535	-0.644614	0.236981	-2.72011	0.00652597	0.0680299
SNORD45B	12.7026	-0.62565	0.249048	-2.51217	0.0119991	0.0960683
MSH4	16.659	-0.327926	0.258405	-1.26904	0.204427	0.479393
ASB17	2.23452	0.242878	0.316527	0.767323	0.442889	0.711936
LOC101927342	0.358933	0.306645	0.222276	1.37956	0.167721	0.432201
ST6GALNAC3	22.9659	0.306495	0.239983	1.27715	0.201548	0.476053
ST6GALNAC5	88.3524	0.00324465	0.312539	0.0103816	0.991717	0.996869
MIR7156	0.771528	-0.174501	0.262795	-0.664019	0.506678	0.755124
PIGK	294.335	-0.30847	0.174912	-1.76357	0.0778044	0.284884
AK5	117.65	0.225836	0.286424	0.788468	0.430423	0.702114
ZZZ3	647.176	0.020313	0.138118	0.14707	0.883077	0.954254
USP33	653.056	-0.252887	0.148546	-1.70241	0.0886778	0.305398
FAM73A	410.392	-0.208734	0.178411	-1.16996	0.242015	0.524263
NEXN-AS1	9.97131	-0.152969	0.252963	-0.604708	0.545373	0.781233
NEXN	68.7338	-0.548097	0.229729	-2.38585	0.0170398	0.118357
FUBP1	645.281	-0.0319184	0.0989666	-0.322517	0.747061	0.896488
DNAJB4	115.094	-0.170346	0.209723	-0.812244	0.416652	0.69032
GIPC2	21.1277	0.384464	0.281599	1.36529	0.172162	0.438519
MGC27382	1.58656	0.457052	0.308111	1.4834	0.137968	0.387828
PTGFR	51.673	-0.116159	0.279787	-0.415168	0.678019	0.860559
IFI44L	708.077	-0.133914	0.274668	-0.48755	0.625869	0.832796
IFI44	311.113	-0.280415	0.235406	-1.1912	0.233577	0.513713
ADGRL4	160.714	-0.0539938	0.205947	-0.262173	0.793188	0.917192
LOC101927412	2.30039	0.794145	0.319808	2.48319	0.0130212	0.101042
LOC101927434	0.823284	0.650142	0.266117	2.44307	0.014563	0.10784
ADGRL2	295.489	-0.0735886	0.178061	-0.413277	0.679404	0.861338
LINC01361	2.03923	1.14833	0.317544	3.6163	0.000298845	0.0114655
LOC101927587	15.6027	-0.0514951	0.272068	-0.189273	0.849879	0.941662
LOC101927560	15.2467	0.218798	0.246661	0.887039	0.375058	0.65664
TTLL7	67.3245	-0.161674	0.220552	-0.733042	0.463533	0.726831
PRKACB	369.545	-0.224516	0.162767	-1.37937	0.167781	0.432229
SAMD13	12.8323	0.121863	0.313573	0.388628	0.697552	0.871854
UOX	4.44424	0.615175	0.320565	1.91903	0.05498	0.23505
DNASE2B	3.87603	0.625553	0.320571	1.95137	0.0510127	0.225409
RPF1	117.713	-0.07479	0.172465	-0.433655	0.664539	0.853422
GNG5	177.357	0.193083	0.182584	1.0575	0.290285	0.57628
SPATA1	49.2218	-0.522919	0.246682	-2.11981	0.0340219	0.178974
CTBS	175.693	-0.384659	0.169274	-2.27241	0.0230616	0.141279
LINC01461	1.76604	0.391884	0.31998	1.22472	0.220682	0.499001
LINC01555	2.28416	1.29544	0.317381	4.08167	4.47e-05	0.00367709
SSX2IP	190.098	-0.289211	0.182976	-1.5806	0.113969	0.34941
LPAR3	13.9792	0.171492	0.312515	0.548748	0.583179	0.805875
MCOLN2	50.0102	-0.253299	0.232964	-1.08728	0.276911	0.56174
MCOLN3	47.1881	-0.453122	0.261276	-1.73427	0.0828704	0.296181
WDR63	12.4078	0.437847	0.294325	1.48763	0.136848	0.385687
MIR4423	0.373293	0.0591924	0.276235	0.214283	0.830327	0.934145
SYDE2	322.693	-0.184982	0.220588	-0.838585	0.401702	0.678133
C1orf52	99.0368	-0.536785	0.144767	-3.70793	0.000208957	0.00926523
BCL10	154.453	-0.129764	0.155213	-0.836035	0.403135	0.679536
LOC646626	1.96044	0.152029	0.317423	0.478948	0.631976	0.835394
DDAH1	490.263	-0.0968097	0.17589	-0.5504	0.582045	0.805693
CYR61	946.645	2.53453	0.210699	12.0292	2.5e-33	9.11e-30
ZNHIT6	216.679	-0.154294	0.157925	-0.97701	0.328564	0.612448
COL24A1	62.3625	0.140569	0.214754	0.654556	0.512753	0.758425
ODF2L	316.67	-0.447849	0.19447	-2.30292	0.0212835	0.13475
MIR7856	0.869395	0.223821	0.316667	0.706802	0.479689	0.73714
CLCA2	29.2818	0.260144	0.320576	0.811488	0.417085	0.690639
CLCA1	4.11787	1.07046	0.319476	3.35066	0.000806199	0.0206263
CLCA4	6.26468	0.79374	0.318473	2.49233	0.0126907	0.0994268
CLCA3P	6.19685	0.721686	0.309178	2.3342	0.019585	0.128701
SH3GLB1	797.518	-0.172667	0.134253	-1.28613	0.198397	0.472365
15-Sep	531.637	-0.159632	0.133612	-1.19474	0.232188	0.512408
HS2ST1	399.639	-0.156637	0.14893	-1.05175	0.292914	0.578975
LINC01140	34.0667	0.337209	0.237206	1.42159	0.155146	0.413875
LOC101927844	1.21646	0.885877	0.310152	2.85626	0.00428661	0.0537457
LMO4	253.587	-0.0781011	0.188157	-0.415086	0.678079	0.860559
LINC01364	5.17353	0.0232993	0.259495	0.0897874	0.928456	0.972922
PKN2-AS1	5.35938	0.675348	0.312151	2.16353	0.0305006	0.167312
PKN2	659.43	-0.355506	0.167271	-2.12533	0.0335591	0.17761
GTF2B	118.332	0.162368	0.13508	1.20201	0.229361	0.508585
CCBL2	163.931	-0.14581	0.162851	-0.895358	0.370596	0.652064
RBMXL1	206.081	-0.136009	0.135379	-1.00466	0.315062	0.600096
GBP3	278.079	0.00493726	0.202833	0.0243415	0.98058	0.992353
GBP1	278.221	0.318682	0.174037	1.83112	0.0670834	0.261555
GBP2	309.552	0.205917	0.177331	1.1612	0.245562	0.528139
GBP7	8.05972	0.634063	0.277911	2.28153	0.0225171	0.139369
GBP4	327.389	-0.0203572	0.239756	-0.0849081	0.932334	0.974377
GBP5	134.718	0.171549	0.247894	0.692024	0.488922	0.744253
LOC729930	1.35684	0.491097	0.314131	1.56335	0.11797	0.356606
GBP6	12.0164	0.642121	0.279373	2.29844	0.021537	0.135581
GBP1P1	11.9085	-0.124441	0.264136	-0.471122	0.637553	0.838579
LRRC8B	302.046	-0.386955	0.161507	-2.3959	0.0165798	0.116668
FLJ27354	5.87504	0.000476724	0.269065	0.00177178	0.998586	0.999212
LRRC8C	216.427	-0.124038	0.15756	-0.787246	0.431138	0.702518
LRRC8D	167.26	-0.107854	0.113694	-0.948634	0.342807	0.626428
GEMIN8P4	5.67032	0.243659	0.248538	0.98037	0.326903	0.611209
ZNF326	274.017	-0.365026	0.148241	-2.46238	0.0138018	0.10432
BARHL2	0.768449	0.537332	0.278497	1.9294	0.0536812	0.231944
ZNF644	679.072	-0.231021	0.178272	-1.29589	0.195014	0.468504
HFM1	18.2194	0.278569	0.300645	0.926571	0.35415	0.636367
CDC7	66.2646	-0.0585604	0.188653	-0.310413	0.756247	0.901622
TGFBR3	540.464	0.13259	0.255112	0.519731	0.603251	0.818603
BRDT	6.26231	0.929051	0.31713	2.92956	0.00339443	0.0473737
EPHX4	9.23298	0.209977	0.306543	0.684984	0.493354	0.747684
SETSIP	0.973888	0.783707	0.30893	2.53684	0.0111857	0.0927842
BTBD8	30.8461	-0.390684	0.208488	-1.87389	0.0609458	0.24889
KIAA1107	61.2678	-0.167627	0.200573	-0.835741	0.403301	0.679643
C1orf146	3.77309	-0.153458	0.307714	-0.498706	0.617987	0.828279
GLMN	78.309	-0.527897	0.208752	-2.52883	0.0114443	0.093712
RPAP2	212.033	-0.154819	0.13014	-1.18963	0.234191	0.514236
GFI1	14.5657	0.582412	0.252691	2.30484	0.0211756	0.1344
EVI5	370.408	-0.223777	0.131223	-1.70531	0.0881363	0.304757
RPL5	2252.77	0.365706	0.173492	2.10792	0.0350379	0.182403
FAM69A	129.276	-0.0836826	0.148884	-0.562066	0.574071	0.801485
SNORD21	33.5041	0.388858	0.271381	1.43289	0.15189	0.40856
SNORA66	81.5118	1.04268	0.25494	4.0899	4.32e-05	0.00356704
MTF2	310.331	-0.243054	0.152554	-1.59324	0.111107	0.344713
TMED5	537.28	-0.339142	0.207911	-1.63118	0.102852	0.331922
CCDC18	97.6254	-0.320408	0.197258	-1.6243	0.104311	0.333847
LOC100131564	270.586	-0.0229723	0.149679	-0.153478	0.878022	0.951756
DR1	477.59	-0.291886	0.169483	-1.72222	0.0850305	0.299826
FNBP1L	1055.56	0.0100399	0.165682	0.0605978	0.951679	0.981556
BCAR3	209.803	-0.044232	0.21455	-0.206162	0.836665	0.935488
LOC100129046	36.742	0.0539329	0.247657	0.217772	0.827606	0.933534
MIR760	0.361492	-0.0197781	0.28261	-0.0699838	0.944207	0.97833
DNTTIP2	186.216	0.0495293	0.16546	0.299343	0.764679	0.904326
GCLM	156.933	-0.266633	0.159001	-1.67692	0.0935578	0.314724
ABCA4	30.8226	0.51681	0.26808	1.92782	0.0538777	0.232399
ARHGAP29	1086.7	-0.217025	0.21468	-1.01092	0.312053	0.597528
ABCD3	757.445	-0.312823	0.188544	-1.65915	0.0970847	0.321811
F3	172.156	0.121691	0.269147	0.452135	0.651172	0.846573
LINC01057	27.1581	0.0579715	0.216644	0.267589	0.789016	0.915138
MIR378G	1.83925	0.113105	0.320578	0.352817	0.724226	0.885801
SLC44A3	73.463	-0.264202	0.183411	-1.44049	0.14973	0.405344
CNN3	901.237	0.0015202	0.172608	0.00880726	0.992973	0.997464
LOC729970	17.127	0.0224197	0.254218	0.0881907	0.929725	0.973402
ALG14	36.6318	0.0950376	0.211163	0.450068	0.652661	0.847568
TMEM56	84.8699	-0.157595	0.240694	-0.65475	0.512629	0.758362
TMEM56-RWDD3	6.31136	-0.63788	0.282979	-2.25416	0.0241863	0.14514
LOC101928118	9.46015	0.0899289	0.271324	0.331445	0.740309	0.893505
RWDD3	49.3731	-0.262988	0.185481	-1.41787	0.15623	0.415722
FLJ31662	6.57999	0.597936	0.319697	1.87032	0.061439	0.250064
LOC100996635	11.7792	0.535122	0.313913	1.70468	0.0882538	0.304831
LOC102723661	1.24824	0.426411	0.297894	1.43142	0.15231	0.409171
LOC101928241	1.28311	0.837201	0.305407	2.74126	0.00612045	0.0655139
PTBP2	280.394	-0.205658	0.167857	-1.2252	0.220501	0.498954
DPYD	411.469	-0.0131691	0.135417	-0.0972484	0.922529	0.969844
DPYD-AS1	8.98908	0.18135	0.275012	0.659427	0.509622	0.756741
DPYD-AS2	15.4024	0.198421	0.251935	0.787589	0.430937	0.702443
MIR137HG	1.89426	0.866136	0.319962	2.707	0.00678943	0.0693409
MIR2682	0.141121	0.065817	0.135588	0.485419	0.627379	0.8335
MIR137	0	NA	NA	NA	NA	NA
LOC729987	2.04743	0.620748	0.301336	2.05999	0.0393999	0.194406
SNX7	136.374	0.0871725	0.154311	0.564916	0.572131	0.800319
LPPR5	6.84974	0.524583	0.316239	1.65882	0.0971527	0.321951
LOC100129620	1.51519	0.826753	0.303432	2.72468	0.00643648	0.0674344
LPPR4	30.5521	0.264288	0.23431	1.12794	0.259346	0.543082
LOC101928270	0.935088	0.786477	0.303167	2.5942	0.00948105	0.0845187
MIR548N	1.7925	0.381776	0.320479	1.19127	0.233548	0.513713
PALMD	99.0068	0.432859	0.225006	1.92376	0.0543845	0.233384
FRRS1	99.8999	0.0432456	0.142689	0.303076	0.761832	0.904103
AGL	767.908	-0.0917368	0.239941	-0.38233	0.702217	0.873581
SLC35A3	588.201	-0.475264	0.179922	-2.6415	0.00825391	0.0780469
HIAT1	418.067	-0.262186	0.138428	-1.89402	0.0582222	0.24353
SASS6	89.4043	-0.331395	0.192781	-1.71902	0.0856103	0.300661
TRMT13	108.15	-0.447745	0.192825	-2.32203	0.0202313	0.130894
LRRC39	13.5789	-0.613076	0.236421	-2.59315	0.00951001	0.0846586
DBT	299.032	-0.188944	0.140959	-1.34042	0.18011	0.45006
RTCA-AS1	9.84895	0.212157	0.210723	1.00681	0.314027	0.599107
RTCA	179.98	0.00489029	0.118639	0.0412198	0.967121	0.987339
MIR553	9.60185	-0.74544	0.249651	-2.98593	0.0028272	0.0429408
CDC14A	188.678	0.0314263	0.237046	0.132575	0.89453	0.959888
GPR88	7.38474	0.216401	0.304378	0.710962	0.477108	0.73584
LINC01349	0.80703	0.830046	0.285745	2.90485	0.00367434	0.0493649
VCAM1	191.735	0.0138106	0.196895	0.070142	0.944081	0.97833
EXTL2	115.999	-0.310116	0.169467	-1.82995	0.0672573	0.261993
SLC30A7	799.804	-0.304884	0.158929	-1.91837	0.0550645	0.235175
DPH5	89.0098	0.0742019	0.136845	0.542232	0.587659	0.808198
LOC102606465	23.5355	-0.245751	0.187489	-1.31075	0.189941	0.461702
LOC101928370	4.37166	0.610428	0.316852	1.92654	0.0540368	0.232754
S1PR1	123.898	0.642366	0.188093	3.41516	0.000637453	0.0177617
LINC01307	0.605336	0.364925	0.241203	1.51293	0.130296	0.37604
OLFM3	4.5521	1.28261	0.314554	4.07755	4.55e-05	0.00369019
DNAJA1P5	1.63154	0.313269	0.29784	1.0518	0.29289	0.578975
COL11A1	1594.74	-0.137677	0.306071	-0.449819	0.652841	0.847568
LOC101928436	1.42531	0.740208	0.311082	2.37946	0.0173378	0.119452
RNPC3	157.218	-0.787463	0.16429	-4.79314	1.64e-06	0.000472179
AMY2B	102.447	-0.223534	0.175773	-1.27172	0.203473	0.478034
ACTG1P4	12.0758	-0.259404	0.213791	-1.21336	0.224994	0.503755
AMY2A	1.52426	0.181353	0.288767	0.628026	0.529987	0.770134
AMY1A	0	NA	NA	NA	NA	NA
AMY1C	0	NA	NA	NA	NA	NA
AMY1B	0	NA	NA	NA	NA	NA
LOC100129138	0.922275	0.750078	0.301543	2.48747	0.0128656	0.100271
LOC101928476	1.55186	0.899082	0.291305	3.0864	0.00202599	0.0353683
PRMT6	120.416	-0.133069	0.166182	-0.800746	0.423279	0.695511
NTNG1	8.25322	-0.13864	0.316735	-0.437717	0.661591	0.851736
VAV3	1180.21	0.0261963	0.19735	0.13274	0.894399	0.959828
MIR7852	0.478996	0.300724	0.26657	1.12812	0.259268	0.543081
VAV3-AS1	3.74553	0.258523	0.313452	0.82476	0.409508	0.684943
SLC25A24	575.04	-0.318126	0.185844	-1.71179	0.0869355	0.30287
NBPF4	9.50709	-0.268049	0.302672	-0.885607	0.375829	0.657271
NBPF6	7.93114	-0.379948	0.310125	-1.22514	0.220521	0.498954
FAM102B	540.737	-0.270735	0.17641	-1.5347	0.124859	0.367596
HENMT1	56.6712	0.223439	0.213284	1.04761	0.294818	0.580877
PRPF38B	303.326	-0.0901767	0.150026	-0.601074	0.54779	0.782996
FNDC7	3.83914	0.917415	0.320581	2.86173	0.00421342	0.05322
STXBP3	242.053	-0.164127	0.199275	-0.823623	0.410154	0.685334
AKNAD1	9.59156	0.536149	0.301627	1.77752	0.0754821	0.280246
SPATA42	0.766058	0.0134705	0.299592	0.0449627	0.964137	0.986053
GPSM2	100.289	-0.25684	0.189111	-1.35815	0.174418	0.441358
CLCC1	341.53	-0.153874	0.103775	-1.48277	0.138136	0.387984
WDR47	144.319	-0.0467872	0.130042	-0.359785	0.719008	0.883168
TAF13	65.2768	-0.037368	0.199727	-0.187095	0.851586	0.942598
TMEM167B	448.999	-0.0661825	0.144527	-0.457923	0.647008	0.843909
SCARNA2	2543.72	0.0498335	0.226202	0.220305	0.825634	0.932544
C1orf194	11.3497	-0.172018	0.268713	-0.640153	0.522073	0.764988
KIAA1324	1456.62	0.0831243	0.201061	0.413429	0.679292	0.861338
SARS	417.343	0.15297	0.099804	1.53271	0.125348	0.368313
CELSR2	1293.13	-0.484641	0.242303	-2.00015	0.0454846	0.210313
PSRC1	27.7223	0.0969748	0.190491	0.509079	0.610697	0.823201
MYBPHL	3.51719	0.520449	0.314044	1.65725	0.0974698	0.322557
SORT1	1139.4	-0.00391444	0.123392	-0.0317236	0.974693	0.989843
PSMA5	285.693	0.0655647	0.124448	0.526844	0.598302	0.815576
SYPL2	10.1218	0.725161	0.295109	2.45727	0.0139998	0.105225
ATXN7L2	25.9422	0.00254197	0.194923	0.0130409	0.989595	0.995836
CYB561D1	134.88	-0.467084	0.147858	-3.15901	0.00158307	0.0304227
AMIGO1	25.7111	0.34408	0.222456	1.54673	0.121928	0.363068
GPR61	2.01002	0.256449	0.318495	0.805191	0.420709	0.693903
GNAI3	600.42	-0.160049	0.155187	-1.03133	0.302388	0.588597
MIR197	3.71152	-0.139556	0.287587	-0.485265	0.627489	0.8335
GNAT2	36.4762	-0.98143	0.229421	-4.27786	1.89e-05	0.00219066
AMPD2	165.958	0.0370866	0.136941	0.270822	0.786528	0.913835
GSTM4	65.4918	0.0387839	0.200794	0.193152	0.84684	0.940156
GSTM2	72.671	-0.100415	0.248419	-0.404217	0.686053	0.864804
GSTM1	91.3095	0.0130548	0.289322	0.045122	0.96401	0.986037
GSTM5	22.6353	0.0320393	0.290859	0.110154	0.912287	0.965342
GSTM3	415.774	0.0593659	0.247136	0.240215	0.810163	0.924763
EPS8L3	19.0285	0.138441	0.28613	0.483838	0.628501	0.834105
CSF1	234.062	-0.044959	0.172744	-0.260263	0.794661	0.917815
AHCYL1	976.913	0.204994	0.100779	2.0341	0.041942	0.200938
STRIP1	219.092	-0.0236751	0.111121	-0.213057	0.831283	0.934145
ALX3	26.9135	-0.331611	0.184861	-1.79384	0.0728392	0.274221
LINC01397	1.6187	-0.215925	0.30644	-0.704624	0.481044	0.738202
UBL4B	1.22942	0.491593	0.320231	1.53512	0.124755	0.367502
SLC6A17	9.81054	0.632828	0.292497	2.16354	0.0304998	0.167312
KCNC4-AS1	2.67362	0.529995	0.311667	1.70051	0.0890342	0.306151
KCNC4	76.8439	0.069931	0.224975	0.310838	0.755923	0.901622
LOC440600	6.99363	0.38008	0.288452	1.31765	0.187619	0.458861
RBM15	278.863	-0.243532	0.110987	-2.19424	0.0282181	0.159449
SLC16A4	168.368	-0.176793	0.162662	-1.08687	0.277094	0.561887
LAMTOR5	143.157	0.0103334	0.155662	0.0663833	0.947073	0.979237
LAMTOR5-AS1	2.65193	0.135632	0.286651	0.473161	0.636098	0.837894
PROK1	1.42906	0.585546	0.315447	1.85624	0.0634192	0.25362
CYMP	0.759312	0.668706	0.282652	2.36583	0.0179897	0.122131
LOC440602	0.767316	0.549293	0.283095	1.94031	0.0523415	0.228787
KCNA10	1.48559	0.587872	0.313245	1.87672	0.0605569	0.247936
KCNA2	5.68274	0.473554	0.278319	1.70148	0.0888528	0.305877
KCNA3	129.249	-0.0603798	0.242838	-0.248642	0.803638	0.920647
CD53	219.243	0.269611	0.174755	1.54279	0.122882	0.364592
LRIF1	150.495	-0.280328	0.191245	-1.4658	0.142702	0.395122
DRAM2	245.1	-0.104487	0.150476	-0.694373	0.487449	0.742918
CEPT1	290.87	-0.184837	0.155402	-1.18941	0.234278	0.514236
DENND2D	345.376	-0.0599582	0.13007	-0.460969	0.644821	0.842569
CHI3L2	38.787	0.0143234	0.283464	0.0505297	0.9597	0.984796
CHIAP2	2.1771	1.05634	0.312349	3.38192	0.0007198	0.0191497
CHIA	2.1247	0.926991	0.305189	3.03743	0.00238602	0.0388641
PIFO	41.6852	0.313537	0.254749	1.23077	0.218409	0.496235
PGCP1	0.84158	0.571213	0.271765	2.10187	0.035565	0.183798
OVGP1	33.6975	0.0986558	0.191696	0.514647	0.6068	0.82072
WDR77	176.666	0.137369	0.0975113	1.40875	0.158909	0.419792
ATP5F1	336.373	0.0973836	0.0996168	0.977582	0.328281	0.612402
C1orf162	54.1546	0.582488	0.188647	3.08772	0.00201698	0.0352834
TMIGD3	7.82636	0.507553	0.287257	1.76689	0.0772458	0.283817
ADORA3	30.2918	0.375915	0.2386	1.5755	0.11514	0.351588
LINC01160	3.122	0.167654	0.314188	0.533611	0.593611	0.812019
RAP1A	372.437	0.0169206	0.135321	0.12504	0.900492	0.962122
FAM212B	49.4039	0.0672647	0.1858	0.362027	0.717332	0.881903
FAM212B-AS1	0.609405	-0.154066	0.310163	-0.496727	0.619382	0.828921
LOC101928718	1.64829	-0.476709	0.319406	-1.49248	0.135573	0.383788
DDX20	137.45	-0.181743	0.120103	-1.51322	0.130223	0.375936
KCND3	48.5014	0.0691303	0.280506	0.246448	0.805335	0.921558
KCND3-IT1	3.9413	0.327731	0.311495	1.05212	0.292742	0.578777
KCND3-AS1	8.97633	-0.0159131	0.308826	-0.0515276	0.958905	0.984437
LOC643355	7.25366	0.0456358	0.297564	0.153365	0.878111	0.951756
CTTNBP2NL	263.91	-0.0844326	0.125759	-0.671386	0.501975	0.751825
MIR4256	2.30257	-1.00485	0.317453	-3.16535	0.00154894	0.0299924
WNT2B	31.6125	-0.0626689	0.190233	-0.329432	0.741829	0.894042
ST7L	163.933	-0.0271806	0.142894	-0.190215	0.849141	0.941442
CAPZA1	852.212	-0.0175658	0.133719	-0.131364	0.895487	0.960197
MOV10	318.252	0.0362524	0.143328	0.252932	0.80032	0.919218
RHOC	539.672	0.196985	0.122918	1.60258	0.109028	0.341582
PPM1J	52.346	0.133381	0.238493	0.559266	0.57598	0.802364
FAM19A3	1.47908	0.967142	0.320413	3.01842	0.00254095	0.0405093
LINC01356	3.10627	0.336015	0.309283	1.08643	0.277288	0.562147
SLC16A1	149.866	-0.0120856	0.183738	-0.0657763	0.947556	0.979463
AKR7A2P1	4.98825	-0.0527871	0.28778	-0.183429	0.854462	0.944037
SLC16A1-AS1	12.9124	-0.149825	0.232272	-0.645039	0.518902	0.763067
LOC100996251	19.2381	-0.178577	0.271119	-0.658665	0.510111	0.756883
LRIG2	289.598	-0.184743	0.120588	-1.53202	0.125518	0.368432
LOC643441	2.26343	0.474748	0.320283	1.48227	0.138267	0.388119
MAGI3	618.457	-0.0324263	0.179246	-0.180904	0.856443	0.945025
PHTF1	139.35	-0.259144	0.141571	-1.83049	0.0671763	0.261817
RSBN1	358.04	-0.231786	0.181178	-1.27933	0.200781	0.475304
AP4B1-AS1	14.6048	-0.34449	0.247197	-1.39358	0.163443	0.42617
PTPN22	74.7791	0.141197	0.20782	0.679418	0.496873	0.749252
BCL2L15	13.2521	0.315212	0.268386	1.17447	0.240206	0.521805
AP4B1	91.9102	-0.408091	0.136605	-2.98738	0.00281377	0.042827
DCLRE1B	62.3231	-0.0318343	0.104398	-0.304931	0.760418	0.903381
HIPK1-AS1	7.03064	0.308957	0.297455	1.03867	0.29896	0.585225
HIPK1	1082.96	0.0199685	0.0791567	0.252265	0.800836	0.919497
OLFML3	319.688	0.291552	0.204633	1.42476	0.154227	0.41244
SYT6	10.1788	0.505712	0.273416	1.84961	0.0643703	0.255799
TRIM33	732.074	-0.206481	0.141046	-1.46393	0.143214	0.395931
BCAS2	115.152	-0.0880585	0.164886	-0.534058	0.593302	0.811982
DENND2C	41.2643	-0.044776	0.212939	-0.210276	0.833452	0.934145
AMPD1	10.5808	0.451506	0.313428	1.44054	0.149714	0.405344
NRAS	512.236	-0.295449	0.170655	-1.73126	0.083405	0.297173
CSDE1	3323.73	0.126493	0.11792	1.0727	0.283405	0.569037
SIKE1	426.907	-0.34169	0.168984	-2.02202	0.0431742	0.204306
SYCP1	7.19864	0.841228	0.317667	2.64814	0.00809349	0.0772162
TSHB	1.77907	0.0273708	0.316061	0.0865998	0.93099	0.97403
TSPAN2	67.6282	-0.311601	0.248323	-1.25482	0.209543	0.486344
NGF	2.54427	0.752747	0.317019	2.37445	0.0175751	0.120275
VANGL1	345.623	-0.0125422	0.137926	-0.0909341	0.927545	0.972529
CASQ2	16.3867	0.538987	0.290259	1.85692	0.0633231	0.253548
NHLH2	4.16835	-0.0223319	0.313101	-0.071325	0.943139	0.977945
LOC101928995	2.5473	0.186163	0.31878	0.583986	0.55923	0.791492
LOC101928977	3.49513	-0.189965	0.308704	-0.615364	0.538314	0.776133
SLC22A15	118.99	-0.134232	0.204229	-0.657262	0.511012	0.757644
MAB21L3	5.00698	0.679819	0.30732	2.21209	0.0269604	0.154753
ATP1A1	1113.24	0.448817	0.133097	3.3721	0.000745967	0.0196615
ATP1A1-AS1	38.8282	-0.228146	0.161169	-1.41557	0.156902	0.416729
LOC101929023	3.49705	0.468456	0.311307	1.50481	0.132374	0.379315
CD58	88.2514	-0.355059	0.172513	-2.05816	0.0395747	0.19479
MIR548AC	1.55511	-0.0605964	0.320563	-0.189031	0.850068	0.941734
IGSF3	576.99	0.120397	0.131443	0.915963	0.359687	0.640971
MIR320B1	0.0805111	0.0336867	0.133058	0.253174	0.800134	0.919167
C1orf137	0.523676	0.364683	0.27645	1.31916	0.187115	0.458277
CD2	63.3274	0.214924	0.24623	0.872856	0.382741	0.66305
PTGFRN	1058.31	0.0191588	0.136174	0.140693	0.888112	0.957103
CD101	19.4164	-0.00338656	0.212914	-0.0159058	0.98731	0.995179
LOC101929099	5.87285	0.141359	0.284134	0.49751	0.61883	0.82874
TTF2	163.953	0.00756192	0.125092	0.0604507	0.951797	0.981556
MIR942	1.56551	0.272056	0.307869	0.883675	0.376871	0.657916
TRIM45	113.834	-0.17369	0.169753	-1.0232	0.306215	0.59203
VTCN1	653.523	-0.15441	0.319201	-0.48374	0.628571	0.834131
LINC01525	0.84634	0.584371	0.273578	2.13603	0.0326768	0.174784
MAN1A2	773.091	-0.0539532	0.129969	-0.415123	0.678052	0.860559
LOC100996263	0.973676	0.7637	0.293262	2.60416	0.00920995	0.0832366
FAM46C	490.024	0.121685	0.196086	0.620572	0.534881	0.773594
GDAP2	592.266	-0.163533	0.139446	-1.17273	0.240903	0.522827
WDR3	254.22	0.0911237	0.122223	0.745554	0.455937	0.721253
SPAG17	66.448	-0.193104	0.29554	-0.653393	0.513503	0.758931
TBX15	68.0282	0.215048	0.217531	0.988583	0.322867	0.607308
WARS2	122.827	-0.0812184	0.166385	-0.488136	0.625453	0.832591
WARS2-IT1	4.58581	-0.0161836	0.295279	-0.0548077	0.956292	0.983201
LOC101929147	102.345	-0.25257	0.160291	-1.5757	0.115096	0.351578
HAO2	3.52226	1.17532	0.315155	3.72933	0.000191986	0.00885078
HAO2-IT1	0.375259	0.0576817	0.243155	0.237222	0.812484	0.926253
HSD3B2	1.55809	0.681024	0.311334	2.18744	0.0287103	0.161101
HSD3B1	2.0504	0.747194	0.320553	2.33095	0.019756	0.129078
HSD3BP4	32.8729	0.185835	0.237292	0.783148	0.43354	0.704391
LINC00622	11.5409	-0.347607	0.285455	-1.21773	0.223326	0.50165
ZNF697	179.952	-0.0876292	0.148959	-0.588277	0.556346	0.789349
PHGDH	61.4583	0.631197	0.248629	2.53871	0.0111263	0.0926319
HMGCS2	86.3222	-0.0162607	0.320402	-0.0507509	0.959524	0.984796
REG4	1.95106	0.975046	0.316059	3.08501	0.00203545	0.0354365
NBPF7	2.02507	1.06405	0.314242	3.38607	0.000709006	0.0189414
ADAM30	1.95145	0.995698	0.308427	3.22831	0.00124525	0.0262215
NOTCH2	3738.92	-0.0625259	0.0819903	-0.762601	0.445701	0.713994
SEC22B	279.216	0.180403	0.116583	1.54742	0.121761	0.362869
PFN1P2	28.3837	-0.38906	0.242465	-1.6046	0.108582	0.340941
NBPF8	96.0886	-0.513283	0.184999	-2.77453	0.00552822	0.0618715
RNVU1-19	52.6541	1.42991	0.284479	5.02642	5e-07	0.000200497
PPIAL4A	0.375074	0.182216	0.206822	0.881028	0.378302	0.658837
LINC00623	19.0682	0.188361	0.18904	0.996411	0.319051	0.604133
RNVU1-20	0	NA	NA	NA	NA	NA
RNVU1-4	0	NA	NA	NA	NA	NA
FCGR1B	6.52132	0.0738386	0.275911	0.267617	0.788994	0.915138
HIST2H2BA	1.64788	-0.296117	0.317586	-0.932399	0.35113	0.633593
FAM72B	3.82486	0.201685	0.303541	0.664442	0.506408	0.754941
SRGAP2C	32.1182	-0.0617968	0.149421	-0.413576	0.679184	0.861332
SRGAP2-AS1	6.2064	0.836186	0.281352	2.97203	0.00295839	0.0439542
EMBP1	11.397	-0.081283	0.275712	-0.294811	0.768138	0.905109
LOC645166	2.88367	-0.330307	0.295596	-1.11743	0.263812	0.54767
RNVU1-17	1.79313	1.0941	0.319056	3.4292	0.000605372	0.0172359
LOC388692	0	NA	NA	NA	NA	NA
FAM231D	0	NA	NA	NA	NA	NA
FCGR1C	3.92102	0.262175	0.259844	1.00897	0.312987	0.598132
FAM72C	1.76459	-0.0967306	0.31964	-0.302623	0.762177	0.904326
SRGAP2D	9.84451	0.132944	0.255538	0.52025	0.602889	0.818567
LOC101060524	0	NA	NA	NA	NA	NA
DRD5P2	0	NA	NA	NA	NA	NA
PPIAL4F	0	NA	NA	NA	NA	NA
PPIAL4D	0	NA	NA	NA	NA	NA
PPIAL4E	0	NA	NA	NA	NA	NA
RNVU1-15	65.1525	0.860059	0.273082	3.14945	0.00163576	0.0311596
NBPF15	249.752	-0.282359	0.196243	-1.43883	0.1502	0.405876
SRGAP2B	20.5866	-0.0594044	0.19454	-0.305359	0.760093	0.903214
FAM72D	2.84612	-0.601792	0.31526	-1.90887	0.0562783	0.238169
LOC103091866	18.5224	0.0874036	0.258709	0.337845	0.73548	0.890624
RNVU1-14	132.467	1.46516	0.240269	6.098	1.07e-09	7.84e-07
NBPF20	53.9791	-0.15846	0.163163	-0.971179	0.331459	0.614852
NBPF25P	22.0033	0.135502	0.210425	0.643943	0.519612	0.763354
GPR89A	71.405	-0.290714	0.188581	-1.54158	0.123175	0.365045
PDZK1	91.0054	-0.453785	0.286877	-1.58181	0.113693	0.348929
CD160	40.4936	-0.367247	0.176518	-2.0805	0.0374792	0.189249
RNF115	261.416	0.0381299	0.102398	0.37237	0.709617	0.877792
POLR3C	209.462	-0.0253166	0.120555	-0.21	0.833667	0.934145
NUDT17	26.8229	0.0245841	0.209642	0.117267	0.906648	0.96338
PIAS3	440.509	0.0727457	0.157784	0.461046	0.644766	0.842569
MIR6736	0.189467	-0.130649	0.20917	-0.624608	0.532228	0.771641
ANKRD35	13.4515	0.554479	0.258226	2.14726	0.0317724	0.17163
ITGA10	129.397	-0.144802	0.231649	-0.625092	0.531911	0.771437
PEX11B	189.472	-0.00544028	0.130189	-0.0417874	0.966668	0.987153
GNRHR2	10.8358	0.0910364	0.216105	0.42126	0.673565	0.857765
RBM8A	391.287	-0.0255079	0.137657	-0.185301	0.852993	0.943134
LIX1L	249.432	0.219984	0.134726	1.63282	0.102506	0.331392
ANKRD34A	31.0249	-0.996213	0.267256	-3.72757	0.000193337	0.00886504
POLR3GL	60.2509	0.474301	0.148982	3.18361	0.00145451	0.0288193
TXNIP	4022.8	0.480232	0.161357	2.97621	0.00291833	0.0436699
HFE2	2.1183	0.685818	0.318677	2.15208	0.031391	0.170322
RNVU1-6	39.4315	0.900432	0.271433	3.31733	0.000908817	0.0221183
LOC101928979	8.06644	0.0241872	0.278345	0.0868965	0.930754	0.97403
NBPF10	68.8218	-0.362262	0.181202	-1.99922	0.0455851	0.210522
NOTCH2NL	191.938	-0.0985647	0.137317	-0.717789	0.472887	0.732505
NUDT4P2	0	NA	NA	NA	NA	NA
NUDT4P1	0	NA	NA	NA	NA	NA
CH17-408M7.1	6.32572	-0.199793	0.286938	-0.696295	0.486244	0.742002
HYDIN2	34.0248	-0.236284	0.243999	-0.968384	0.332853	0.616061
NBPF12	200.412	-0.306965	0.121894	-2.51828	0.0117929	0.0953511
LOC728989	2.29753	0.137345	0.320249	0.428868	0.668019	0.854964
RNVU1-8	15.4704	0.27472	0.303684	0.904624	0.365665	0.646791
NBPF13P	2.06289	0.757456	0.318517	2.37807	0.0174036	0.119679
PRKAB2	397.187	-0.353689	0.146894	-2.40778	0.0160499	0.114405
PDIA3P1	38.1442	0.00116372	0.204214	0.00569856	0.995453	0.998189
FMO5	160.791	0.142683	0.236043	0.604481	0.545524	0.781287
CHD1L	259.109	-0.0775669	0.125316	-0.618968	0.535937	0.774681
LINC00624	4.59912	0.447452	0.319643	1.39985	0.161558	0.423939
BCL9	372.437	0.100222	0.15497	0.646718	0.517814	0.762115
ACP6	116.819	-0.098316	0.15976	-0.6154	0.538291	0.776133
GJA5	78.5508	-0.0196457	0.205941	-0.095395	0.924001	0.970672
GJA8	0.562399	0.468274	0.280621	1.6687	0.0951761	0.318292
GPR89B	54.2745	-0.232816	0.172597	-1.3489	0.177368	0.445645
PDZK1P1	23.9058	-0.370431	0.24977	-1.48309	0.138051	0.387922
RNVU1-7	342.421	1.18203	0.28602	4.13268	3.59e-05	0.00315782
NBPF11	136.046	-0.470467	0.12845	-3.66265	0.000249619	0.0103473
LOC101927468	1.3903	0.108581	0.311752	0.348291	0.727622	0.887395
MIR5087	3.17243	0.451579	0.319577	1.41305	0.15764	0.417648
RNVU1-1	17.4812	0.983559	0.28954	3.39697	0.000681353	0.0186115
MIR6077	2.65186	0.21504	0.32028	0.671413	0.501958	0.751825
RNU1-13P	374.741	0.682267	0.31219	2.18543	0.0288576	0.161474
LOC100132057	159.587	-0.0471823	0.259129	-0.18208	0.85552	0.944414
RNVU1-3	13.9317	0.791124	0.293871	2.69208	0.00710083	0.0713716
LINC01138	123.833	-0.0844748	0.238091	-0.3548	0.72274	0.885313
PPIAL4G	0.161007	0.059655	0.189652	0.31455	0.753103	0.900184
NBPF14	121.252	-0.389828	0.165544	-2.35483	0.018531	0.124483
PDE4DIP	378.633	0.00487514	0.150694	0.0323512	0.974192	0.989843
LOC653513	29.9482	-0.00368184	0.243104	-0.0151451	0.987916	0.995439
NBPF9	110.299	-0.209718	0.196285	-1.06844	0.285322	0.570771
PPIAL4C	0.356301	0.123615	0.28953	0.426952	0.669414	0.855441
LINC00869	77.4944	-0.0642252	0.28594	-0.224611	0.822282	0.931105
HIST2H2BF	77.6407	0.349398	0.233092	1.49897	0.133881	0.381579
FCGR1A	19.6884	-0.259847	0.258148	-1.00658	0.314136	0.599226
HIST2H3D	11.2295	-0.236042	0.293637	-0.803856	0.42148	0.694405
HIST2H4B	0	NA	NA	NA	NA	NA
HIST2H4A	0	NA	NA	NA	NA	NA
HIST2H3A	0	NA	NA	NA	NA	NA
HIST2H3C	0	NA	NA	NA	NA	NA
HIST2H2AA3	0	NA	NA	NA	NA	NA
HIST2H2AA4	0	NA	NA	NA	NA	NA
HIST2H2BC	14.0915	0.316373	0.245711	1.28758	0.197891	0.4716
HIST2H2BE	406.175	0.533686	0.187011	2.85376	0.00432049	0.0540114
HIST2H2AC	147.795	0.417015	0.190364	2.19062	0.0284795	0.160567
HIST2H2AB	65.3091	0.30642	0.207808	1.47453	0.140338	0.39125
BOLA1	43.4789	0.0845914	0.195138	0.433495	0.664655	0.853458
SV2A	39.7749	0.556388	0.238119	2.33659	0.0194605	0.128367
SF3B4	210.048	0.361661	0.170099	2.12618	0.0334886	0.17747
MTMR11	143.634	-0.167452	0.15548	-1.07701	0.281477	0.566638
OTUD7B	725.664	0.227038	0.135364	1.67724	0.0934961	0.314681
VPS45	314.386	-0.128471	0.124309	-1.03348	0.301381	0.587982
PLEKHO1	131.803	0.190644	0.147127	1.29578	0.19505	0.468537
ANP32E	280.861	-0.0650185	0.209417	-0.310475	0.7562	0.901622
CA14	17.9511	-0.455863	0.177455	-2.5689	0.0102022	0.0878649
APH1A	831.775	0.154449	0.174086	0.887198	0.374972	0.65664
C1orf54	36.5173	0.364994	0.169686	2.151	0.0314759	0.170665
CIART	21.6366	0.306478	0.23431	1.308	0.190873	0.462718
MRPS21	180.015	0.328192	0.124996	2.62563	0.00864899	0.0803255
PRPF3	372.355	-0.185237	0.149025	-1.24299	0.213871	0.490654
RPRD2	628.829	0.0829218	0.112682	0.73589	0.461798	0.725804
TARS2	164.827	0.144665	0.141697	1.02095	0.307278	0.592963
MIR6878	0.210826	0.106566	0.224726	0.474205	0.635353	0.837562
ECM1	122.714	0.243008	0.223102	1.08922	0.276055	0.560746
FALEC	6.0367	-0.337578	0.290162	-1.16341	0.244662	0.527256
ADAMTSL4	247.315	0.384946	0.196802	1.956	0.0504649	0.22353
MIR4257	8.68534	0.25707	0.289455	0.888118	0.374477	0.656202
ADAMTSL4-AS1	43.0641	0.318696	0.194811	1.63592	0.101856	0.330284
MCL1	3321.23	0.557054	0.144256	3.86157	0.00011266	0.00625505
ENSA	1054.47	0.295984	0.148472	1.99354	0.0462028	0.212251
GOLPH3L	413.073	-0.0278066	0.178697	-0.155607	0.876343	0.950879
HORMAD1	10.1998	0.211268	0.299076	0.706404	0.479937	0.737255
CTSS	424.981	0.296177	0.182577	1.6222	0.10476	0.334458
CTSK	1127.45	0.166996	0.150319	1.11094	0.266593	0.550427
ARNT	695.609	0.174017	0.081976	2.12279	0.0337718	0.178062
SETDB1	452.546	-0.0285531	0.118197	-0.241571	0.809112	0.924059
CERS2	1483.95	0.141975	0.182678	0.777188	0.437048	0.707409
ANXA9	151.887	0.360193	0.17894	2.01293	0.0441218	0.206652
FAM63A	312.073	0.173082	0.142654	1.21331	0.225013	0.503755
PRUNE	280.008	0.0784177	0.161131	0.486672	0.626491	0.833186
BNIPL	112.597	0.129253	0.211859	0.610089	0.541803	0.778665
C1orf56	46.4326	0.025543	0.145937	0.175028	0.861058	0.947452
CDC42SE1	1125.39	0.180194	0.138415	1.30184	0.192972	0.465446
MLLT11	39.0295	-0.257462	0.212959	-1.20897	0.226673	0.505946
GABPB2	116.128	-0.0645242	0.145984	-0.441995	0.658493	0.850339
SEMA6C	74.4866	0.111158	0.168538	0.659542	0.509548	0.756741
TNFAIP8L2-SCNM1	0	NA	NA	NA	NA	NA
TNFAIP8L2	31.3259	-0.234628	0.173291	-1.35396	0.175751	0.443107
LYSMD1	101.191	0.177388	0.159838	1.1098	0.267084	0.550917
SCNM1	2.26366	0.219348	0.308582	0.710826	0.477192	0.73584
TMOD4	11.7948	-0.404814	0.21346	-1.89644	0.0579016	0.242825
VPS72	104.946	0.356296	0.136122	2.61748	0.00885817	0.0813219
PIP5K1A	697.038	-0.0565464	0.128851	-0.438851	0.660769	0.851508
PSMD4	275.575	0.421758	0.149731	2.81677	0.00485092	0.0574909
ZNF687	305.117	0.0409786	0.156127	0.26247	0.792959	0.917093
PI4KB	530.012	0.00107451	0.125174	0.00858414	0.993151	0.997525
RFX5	363.183	0.0230834	0.108458	0.212833	0.831457	0.934145
GBAT2	3.45619	-0.248317	0.287216	-0.864567	0.387277	0.666253
SELENBP1	384.65	0.386323	0.194659	1.98461	0.0471881	0.21505
PSMB4	423.659	0.154294	0.155559	0.991865	0.321263	0.606025
POGZ	1280	-0.0592943	0.105902	-0.559896	0.57555	0.802123
CGN	405.767	0.401957	0.191648	2.09737	0.0359611	0.185187
TUFT1	303.356	0.432637	0.207195	2.08807	0.0367916	0.187161
MIR554	23.5871	1.78878	0.290487	6.15787	7.37e-10	5.94e-07
SNX27	879.479	0.201759	0.134544	1.49957	0.133726	0.381434
CELF3	16.81	-0.0686346	0.27329	-0.251142	0.801704	0.920105
RIIAD1	2.74178	0.607991	0.316141	1.92316	0.0544599	0.233569
MRPL9	104.908	0.311807	0.156313	1.99476	0.046069	0.211962
OAZ3	22.6421	0.232588	0.176512	1.31768	0.187609	0.458861
TDRKH	102.005	0.0720617	0.160318	0.449493	0.653076	0.847568
LINGO4	7.36216	-0.0507573	0.296331	-0.171286	0.863999	0.94818
RORC	189.015	0.0558173	0.217603	0.256509	0.797558	0.919167
C2CD4D	6.9638	-0.0555767	0.27413	-0.202738	0.83934	0.93655
LOC100132111	18.2163	0.0853847	0.285153	0.299435	0.764608	0.904326
THEM5	15.0806	0.108911	0.264273	0.412117	0.680253	0.861682
THEM4	124.341	-0.0683419	0.16238	-0.420878	0.673844	0.857904
S100A10	331.642	0.546372	0.192672	2.83576	0.00457172	0.0556272
NBPF18P	1.92641	0.510671	0.318161	1.60507	0.108478	0.340821
S100A11	389.115	0.829815	0.200301	4.14284	3.43e-05	0.00311782
LOC100131107	1.08918	0.988554	0.314117	3.14709	0.00164906	0.031337
TCHHL1	4.77575	0.631803	0.306743	2.05972	0.0394255	0.194425
TCHH	7.80861	0.75543	0.312799	2.41506	0.0157326	0.113027
RPTN	4.02314	1.2521	0.320582	3.9057	9.4e-05	0.0055933
HRNR	30.7357	-0.16712	0.225936	-0.739679	0.459495	0.724208
FLG	60.8591	-0.428567	0.259156	-1.6537	0.0981877	0.323869
FLG-AS1	16.3977	-0.0492989	0.281968	-0.174839	0.861206	0.947452
FLG2	18.8553	0.409791	0.267216	1.53356	0.125138	0.368031
CRNN	2.3104	0.95553	0.307373	3.10869	0.00187916	0.0337983
LCE5A	0.717573	0.371755	0.277953	1.33747	0.181068	0.451312
CRCT1	0.729368	0.318083	0.279712	1.13718	0.255461	0.538955
LCE3E	0.264825	0.20852	0.229234	0.909638	0.363013	0.644292
LCE3D	0.468393	0.365833	0.225188	1.62457	0.104255	0.333847
LCE3C	0.0389955	0.0218564	0.133058	0.164263	0.869524	0.94818
LCE3B	0.106177	0.0159413	0.133058	0.119808	0.904636	0.962844
LCE3A	0.155478	0.0865081	0.205178	0.421625	0.673299	0.857654
LCE2D	0.924785	0.568562	0.25765	2.20672	0.0273336	0.156
LCE2C	0.587811	0.564417	0.271447	2.07929	0.037591	0.189401
LCE2B	0.738586	0.238493	0.247609	0.963184	0.335455	0.61864
LCE2A	0.385695	0.250726	0.236906	1.05834	0.289903	0.575955
LCE4A	0.0884128	0.0277716	0.133058	0.208718	0.834668	0.934145
C1orf68	1.13227	-0.00114487	0.279518	-0.00409586	0.996732	0.998583
KPRP	2.48869	0.208349	0.316905	0.657448	0.510893	0.75756
LCE1F	0.45277	-0.0371849	0.231956	-0.16031	0.872637	0.94949
LCE1E	0.217947	0.163747	0.214761	0.762461	0.445785	0.713995
LCE1D	0.0892342	0.0396018	0.133058	0.297629	0.765986	0.904326
LCE1C	0.952831	-0.0670883	0.268433	-0.249925	0.802645	0.920418
LCE1B	1.14242	0.26434	0.302125	0.874937	0.381608	0.662021
LCE1A	0.491404	0.252794	0.274645	0.920438	0.357344	0.638907
LCE6A	0.400194	0.254006	0.266848	0.951876	0.34116	0.624404
SMCP	0.890773	0.606995	0.28186	2.15354	0.0312766	0.169814
IVL	1.28835	0.0803211	0.290208	0.276771	0.781956	0.911717
SPRR4	0.418402	0.435825	0.249892	1.74406	0.081149	0.292485
SPRR1A	0.670326	0.63495	0.266834	2.37957	0.0173331	0.119451
SPRR3	1.77582	0.889443	0.306786	2.89923	0.00374077	0.0498303
SPRR1B	0.74201	0.506457	0.273193	1.85384	0.0637614	0.254335
SPRR2D	0.624802	0.474773	0.262299	1.81004	0.0702894	0.268701
SPRR2A	0.45798	0.385267	0.2378	1.62013	0.105205	0.335112
SPRR2B	0.648186	0.715236	0.27769	2.57566	0.0100049	0.0870573
SPRR2E	0.775913	0.466269	0.289207	1.61223	0.106912	0.338271
SPRR2F	0.453282	0.409416	0.250101	1.637	0.101629	0.330021
SPRR2C	0.398511	0.36041	0.236077	1.52666	0.126844	0.370749
SPRR2G	0.522568	0.323692	0.262501	1.23311	0.217536	0.495352
LOC101928009	2.04571	0.727076	0.311581	2.33351	0.0196215	0.128761
LELP1	0.579625	0.427132	0.240587	1.77538	0.0758357	0.280765
PRR9	0.826359	0.824699	0.307136	2.68512	0.00725032	0.0719398
LOR	1.00586	-0.0862825	0.296717	-0.290791	0.771211	0.906612
PGLYRP3	1.60503	0.872618	0.301377	2.89544	0.0037863	0.0501073
PGLYRP4	3.32085	1.01773	0.320408	3.17636	0.00149135	0.0292992
S100A9	30.3075	0.43311	0.29639	1.46128	0.143937	0.396822
S100A12	1.41266	0.431879	0.302046	1.42985	0.152761	0.409823
S100A8	9.59721	0.985408	0.301605	3.26722	0.00108611	0.0242263
S100A7A	3.17424	0.510084	0.312604	1.63172	0.102738	0.331712
S100A7L2	0.67337	0.629331	0.299398	2.10199	0.0355541	0.183798
S100A7	13.8527	0.185121	0.271854	0.680956	0.495899	0.74846
S100A6	630.363	0.190676	0.210284	0.906754	0.364537	0.645784
S100A5	1.48035	0.245297	0.320576	0.765175	0.444167	0.712833
S100A4	116.774	0.214572	0.176263	1.21734	0.223475	0.501894
LOC101928034	2.01201	-0.138658	0.319428	-0.434082	0.664229	0.853298
S100A3	2.27086	0.274457	0.30505	0.899711	0.368274	0.64983
S100A2	9.70224	-0.00534691	0.292864	-0.0182574	0.985434	0.994423
S100A16	354.7	-0.104955	0.241516	-0.434569	0.663875	0.853015
S100A14	401.465	0.0836064	0.272431	0.306891	0.758927	0.902668
S100A13	168.417	0.270941	0.171037	1.58411	0.113168	0.348189
S100A1	45.0996	0.441298	0.266004	1.65899	0.0971177	0.321877
CHTOP	300.264	-0.118983	0.100984	-1.17824	0.238701	0.519994
SNAPIN	129.998	0.0257493	0.132987	0.193623	0.846471	0.939915
ILF2	590.436	0.173997	0.124626	1.39615	0.16267	0.425326
NPR1	50.9913	0.418647	0.251824	1.66246	0.0964207	0.320308
MIR8083	0.0323795	0.0277716	0.133058	0.208718	0.834668	0.934145
INTS3	867.587	0.00558648	0.140623	0.0397267	0.968311	0.987725
SLC27A3	93.7208	0.100319	0.186162	0.538881	0.589969	0.809517
LOC343052	1.23471	0.579309	0.315553	1.83585	0.0663793	0.260419
GATAD2B	779.16	0.343014	0.104124	3.29429	0.000986724	0.0231413
DENND4B	423.076	0.0726827	0.159785	0.454878	0.649197	0.845297
CRTC2	162.917	0.299795	0.161485	1.85648	0.0633851	0.253585
SLC39A1	578.404	0.146459	0.144517	1.01344	0.310851	0.59648
MIR6737	0.0353564	0.00411104	0.133058	0.0308967	0.975352	0.989843
CREB3L4	290.056	-0.00870678	0.212693	-0.040936	0.967347	0.987486
JTB	490.561	0.00522013	0.1544	0.0338091	0.973029	0.989843
RAB13	171.353	0.376563	0.129479	2.9083	0.00363398	0.0490031
RPS27	2310.82	0.478892	0.153661	3.11655	0.0018298	0.0333332
NUP210L	31.8099	0.357668	0.22959	1.55785	0.119268	0.358406
MIR5698	0.157056	0.057747	0.14058	0.410776	0.681237	0.862285
TPM3	1559.71	0.272865	0.149641	1.82347	0.068232	0.263997
MIR190B	0.842868	0.33333	0.303469	1.0984	0.27203	0.556361
C1orf189	5.82794	0.195541	0.289527	0.67538	0.499435	0.750636
C1orf43	913.24	0.194098	0.146291	1.32679	0.184579	0.45534
UBAP2L	887.834	0.267843	0.11167	2.39853	0.0164612	0.116298
HAX1	271.59	0.205887	0.161002	1.27878	0.200974	0.475643
AQP10	1.29157	0.660121	0.319053	2.069	0.0385458	0.19194
ATP8B2	481.006	-0.00688793	0.160079	-0.0430282	0.965679	0.986665
IL6R	183.459	-0.0858716	0.146474	-0.586258	0.557702	0.790044
SHE	96.0462	0.156667	0.198479	0.789335	0.429916	0.701646
TDRD10	15.234	0.0934565	0.238625	0.391646	0.69532	0.870503
UBE2Q1	247.842	0.0912549	0.117467	0.776858	0.437243	0.707588
UBE2Q1-AS1	6.77802	-0.387446	0.26003	-1.49001	0.136223	0.384752
CHRNB2	50.7872	-0.814862	0.217026	-3.75468	0.000173566	0.0082902
ADAR	3396.85	0.0736021	0.135311	0.543949	0.586476	0.807667
KCNN3	70.0036	0.19632	0.197446	0.994301	0.320076	0.604865
PMVK	126.959	0.456987	0.185784	2.45977	0.0139026	0.104926
PBXIP1	428.575	0.398879	0.147941	2.6962	0.00701365	0.0708085
PYGO2	396.827	0.0450717	0.147473	0.305627	0.759889	0.903151
SHC1	767.833	0.155974	0.129094	1.20822	0.226961	0.506141
CKS1B	55.0504	0.0954295	0.197419	0.483387	0.628821	0.834162
MIR4258	1.35634	-0.501056	0.3203	-1.56433	0.11774	0.356246
FLAD1	188.881	0.057143	0.178585	0.319977	0.748986	0.897743
LENEP	9.5671	-0.370371	0.226598	-1.63448	0.102157	0.33081
ZBTB7B	530.679	-0.0395091	0.171423	-0.230477	0.817721	0.928554
DCST2	26.0724	0.0982138	0.215372	0.456019	0.648377	0.844702
DCST1	11.7718	0.277852	0.237251	1.17113	0.241547	0.523693
LOC100505666	11.0949	-0.0850581	0.238353	-0.356858	0.721198	0.884443
ADAM15	725.313	-0.220509	0.220423	-1.00039	0.317122	0.602536
EFNA4	65.6931	0.040477	0.20733	0.19523	0.845213	0.939537
EFNA3	42.339	0.105701	0.252397	0.418791	0.675369	0.859053
EFNA1	287.306	0.160306	0.163795	0.978698	0.327729	0.612033
SLC50A1	195.482	0.275578	0.17534	1.57168	0.116025	0.353045
DPM3	31.4974	0.00595216	0.186823	0.0318598	0.974584	0.989843
KRTCAP2	135.23	0.491555	0.180603	2.72175	0.00649371	0.0677489
TRIM46	46.1789	0.51404	0.263251	1.95266	0.0508602	0.224891
MUC1	1256.53	-0.00659918	0.285499	-0.0231146	0.981559	0.992699
MIR92B	0.728476	-0.0282797	0.288167	-0.0981367	0.921824	0.969643
THBS3	397.878	-0.0208104	0.174489	-0.119265	0.905065	0.96298
MTX1	75.8463	-0.0393106	0.177742	-0.221167	0.824962	0.932198
GBAP1	26.0571	-0.0475349	0.22639	-0.209968	0.833692	0.934145
GBA	148	0.192191	0.175949	1.09231	0.274697	0.559191
FAM189B	142.905	-0.00125462	0.196179	-0.00639528	0.994897	0.998189
SCAMP3	180.204	0.228257	0.182761	1.24894	0.211689	0.488792
CLK2	275.766	-0.123536	0.132681	-0.931074	0.351816	0.634244
HCN3	44.1091	0.147878	0.216394	0.683373	0.494371	0.748084
PKLR	2.2771	1.18635	0.319676	3.71109	0.000206366	0.00919823
FDPS	254.708	0.313729	0.1619	1.9378	0.0526478	0.229576
RUSC1-AS1	11.3821	-0.171746	0.256894	-0.668546	0.503785	0.752947
RUSC1	213.397	0.0693884	0.189439	0.366284	0.714153	0.880453
ASH1L	2188.39	-0.0837682	0.122919	-0.68149	0.495561	0.748416
MIR555	1.10416	0.0313364	0.320461	0.0977854	0.922103	0.969655
POU5F1P4	22.236	-0.125829	0.209477	-0.600685	0.54805	0.783191
ASH1L-AS1	41.489	0.0218738	0.13848	0.157956	0.874491	0.950526
MSTO1	5.88694	-0.107349	0.26878	-0.399391	0.689605	0.866771
MSTO2P	30.0671	-0.369972	0.19127	-1.93429	0.0530773	0.2307
YY1AP1	982.595	1.05151	0.236969	4.43732	9.11e-06	0.00146466
DAP3	449.014	0.236213	0.133266	1.77249	0.0763133	0.281683
GON4L	604.794	-0.0140428	0.128069	-0.10965	0.912687	0.965468
SYT11	122.332	0.12807	0.142732	0.897276	0.369572	0.651181
RIT1	389.231	0.069087	0.159324	0.433627	0.66456	0.853422
KIAA0907	565.231	-0.134184	0.105321	-1.27405	0.202646	0.477254
SNORA80E	162.548	0.699304	0.268033	2.60902	0.00908021	0.0825591
SCARNA4	246.459	1.15516	0.261838	4.41174	1.03e-05	0.0015497
RXFP4	1.91399	-0.839325	0.319816	-2.6244	0.00868014	0.0804515
ARHGEF2	495.154	0.0382001	0.145449	0.262637	0.792831	0.91707
MIR6738	0.654145	0.280519	0.290405	0.96596	0.334064	0.617322
SSR2	726.236	0.154152	0.149505	1.03108	0.302504	0.588733
UBQLN4	248.226	0.364122	0.170574	2.13469	0.0327867	0.175073
LAMTOR2	100.925	0.324987	0.198379	1.63821	0.101377	0.329452
RAB25	174.269	0.321602	0.182828	1.75904	0.0785708	0.286671
MEX3A	190.267	0.220547	0.273214	0.807232	0.419533	0.693071
LMNA	1001.7	0.575025	0.159818	3.598	0.000320679	0.0119153
SEMA4A	176.795	0.0363563	0.165943	0.219089	0.82658	0.933064
SLC25A44	260.711	0.120346	0.139592	0.862131	0.388616	0.667452
PMF1	55.1735	0.494412	0.16236	3.04516	0.00232553	0.0382693
PMF1-BGLAP	0	NA	NA	NA	NA	NA
BGLAP	4.63296	-0.131946	0.283395	-0.465591	0.641508	0.840754
PAQR6	54.9861	-0.0477662	0.227863	-0.209627	0.833959	0.934145
SMG5	736.987	-0.108477	0.168671	-0.643126	0.520142	0.76378
TMEM79	98.6596	-0.185573	0.143001	-1.2977	0.19439	0.467804
GLMP	182.506	-0.0674164	0.147571	-0.456841	0.647785	0.844345
VHLL	0.927055	0.318289	0.313575	1.01503	0.310089	0.595489
CCT3	799.368	0.139155	0.150511	0.924551	0.3552	0.637199
TSACC	9.94523	0.226425	0.273138	0.828978	0.407117	0.683164
RHBG	7.32259	-0.0506521	0.306796	-0.1651	0.868865	0.94818
C1orf61	2.41647	0.88052	0.317576	2.77262	0.00556063	0.0620439
MIR9-1	0.100468	0.0385687	0.141885	0.271831	0.785752	0.913391
MEF2D	551.314	0.245148	0.121979	2.00975	0.0444575	0.207729
IQGAP3	193.875	0.078106	0.266672	0.292892	0.769605	0.90596
TTC24	4.18235	0.37593	0.316783	1.18671	0.235341	0.515698
APOA1BP	251.479	0.0813373	0.17649	0.46086	0.644899	0.842578
GPATCH4	140.035	0.065388	0.152661	0.428322	0.668417	0.855134
HAPLN2	2.95338	0.37078	0.320048	1.15852	0.246654	0.529329
BCAN	40.7023	-0.478738	0.286998	-1.66809	0.0952988	0.318578
NES	196.787	0.140351	0.209557	0.669751	0.503016	0.752339
CRABP2	419.64	0.665817	0.245501	2.71207	0.00668641	0.0688134
ISG20L2	241.121	0.0174599	0.128303	0.136084	0.891755	0.958895
RRNAD1	129.059	0.111902	0.167549	0.667877	0.504212	0.753302
MRPL24	161.504	0.394127	0.192053	2.05217	0.0401528	0.196181
HDGF	1109.69	0.214975	0.15894	1.35256	0.176198	0.443927
PRCC	209.522	0.27867	0.15131	1.84172	0.0655164	0.258184
SH2D2A	17.9279	0.108472	0.225295	0.481469	0.630183	0.834494
NTRK1	7.97511	0.534604	0.281486	1.89922	0.0575357	0.241827
INSRR	9.7534	0.120296	0.267806	0.449193	0.653293	0.847625
PEAR1	91.4438	0.136528	0.197911	0.689844	0.490292	0.745139
LRRC71	7.16633	-0.213365	0.261468	-0.816028	0.414484	0.688689
ARHGEF11	659.025	0.00508329	0.126974	0.0400341	0.968066	0.987725
MIR765	1.94661	0.0507372	0.320461	0.158326	0.8742	0.950345
ETV3L	2.52722	1.31353	0.320111	4.10337	4.07e-05	0.00343212
ETV3	118.824	0.179538	0.110967	1.61794	0.105676	0.33608
CYCSP52	5.36451	-0.583006	0.279198	-2.08814	0.0367848	0.187161
FCRL5	38.0975	0.191206	0.27332	0.699569	0.484197	0.740103
FCRL4	4.27225	0.854351	0.320111	2.66892	0.00760953	0.0744341
FCRL3	22.1425	0.579841	0.275552	2.10429	0.0353532	0.183163
FCRL2	14.5447	0.0746939	0.304219	0.245527	0.806049	0.92204
FCRL1	18.2838	0.767664	0.28965	2.65031	0.00804176	0.0769801
CD5L	1.99938	1.02115	0.320498	3.18615	0.00144181	0.028679
KIRREL	696.984	-0.0832037	0.167418	-0.496981	0.619203	0.828867
LOC646268	1.19159	0.825705	0.320284	2.57804	0.00993612	0.0868333
CD1D	21.0331	0.185271	0.200792	0.922699	0.356164	0.638175
CD1A	7.23576	0.0910368	0.31418	0.289761	0.771999	0.907188
CD1C	27.4241	0.324394	0.26155	1.24028	0.214874	0.491701
CD1B	5.38005	0.858803	0.319495	2.688	0.00718811	0.0716113
CD1E	16.2828	0.464393	0.285584	1.62612	0.103924	0.333498
OR10T2	0.841148	0.49912	0.254339	1.96242	0.0497139	0.221626
OR10K2	0.787258	0.498657	0.261043	1.91025	0.0561009	0.237812
OR10K1	0.865317	0.578068	0.274584	2.10525	0.0352694	0.182944
OR10R2	0.882551	0.720567	0.28414	2.53596	0.0112141	0.0929591
OR6Y1	0.998465	0.970517	0.306196	3.1696	0.00152651	0.0296931
OR6P1	0.819326	0.741557	0.269704	2.74952	0.0059683	0.0643981
OR10X1	0.890303	0.749901	0.295765	2.53546	0.0112299	0.0929701
OR10Z1	0.561358	0.352229	0.271907	1.2954	0.195182	0.468667
SPTA1	15.085	1.49277	0.30569	4.88327	1.04e-06	0.000337333
OR6K2	0.648353	0.554291	0.261976	2.11581	0.0343607	0.180179
OR6K3	1.32608	0.348773	0.297666	1.1717	0.241319	0.523334
OR6K6	0.658745	0.696649	0.28083	2.48068	0.0131132	0.101481
OR6N1	0.732262	0.440691	0.275673	1.5986	0.109909	0.34261
OR6N2	1.20901	0.890337	0.295216	3.01589	0.00256229	0.0406464
MNDA	52.7872	-0.00549083	0.249181	-0.0220355	0.98242	0.992956
PYHIN1	20.7219	0.0789315	0.274624	0.287416	0.773794	0.907795
IFI16	375.69	-0.161974	0.17589	-0.920883	0.357112	0.638907
AIM2	13.3857	0.176488	0.265094	0.665755	0.505568	0.754268
CADM3	11.9916	0.121435	0.298423	0.406922	0.684065	0.86386
CADM3-AS1	8.48507	-0.153828	0.303079	-0.50755	0.611769	0.82381
ACKR1	61.7737	0.940261	0.286973	3.27648	0.00105111	0.0239049
FCER1A	34.8881	0.148977	0.279181	0.533622	0.593603	0.812019
OR10J3	0.756164	0.737285	0.276003	2.67129	0.00755608	0.0740478
OR10J1	0.956736	0.824536	0.303852	2.71361	0.00665552	0.0686796
OR10J5	1.07416	0.944849	0.289595	3.26266	0.00110372	0.0244272
APCS	0.859177	0.71986	0.29141	2.47026	0.0135014	0.103002
CRP	2.08435	0.825508	0.320485	2.57581	0.0100007	0.0870573
DUSP23	78.0071	0.0453041	0.180215	0.251389	0.801513	0.920029
FCRL6	17.3732	0.0466746	0.225771	0.206735	0.836217	0.935151
SLAMF8	51.2398	-0.00691839	0.224522	-0.0308138	0.975418	0.989843
C1orf204	14.6786	0.36865	0.200848	1.83547	0.0664366	0.260445
VSIG8	24.0624	-0.121625	0.284254	-0.427873	0.668744	0.855196
CFAP45	16.4984	0.190286	0.273775	0.695045	0.487027	0.742607
MIR4259	0.120328	0.0572041	0.148258	0.385842	0.699613	0.872556
TAGLN2	907.322	0.313709	0.183745	1.70731	0.0877647	0.304188
IGSF9	161.724	0.232687	0.220682	1.0544	0.2917	0.577551
SLAMF9	1.78221	1.048	0.320575	3.26912	0.00107883	0.02421
LINC01133	3.03904	0.926566	0.320352	2.89234	0.00382386	0.050319
PIGM	241.604	-0.155888	0.151646	-1.02798	0.303961	0.589757
KCNJ10	12.8995	0.224009	0.245111	0.91391	0.360764	0.641772
KCNJ9	6.8048	0.552266	0.26916	2.05181	0.0401881	0.196291
IGSF8	207.296	0.141057	0.18235	0.773549	0.439198	0.709305
ATP1A2	44.5092	0.252675	0.295967	0.853726	0.393257	0.670829
ATP1A4	20.1262	0.478264	0.289503	1.65202	0.0985311	0.324582
CASQ1	19.8236	0.431609	0.29159	1.48019	0.138823	0.388594
LOC729867	16.8382	-0.345616	0.213475	-1.619	0.105448	0.335677
PEA15	1082.32	0.224655	0.135979	1.65214	0.0985067	0.324544
DCAF8	1064.49	0.111476	0.09944	1.12103	0.262273	0.546113
PEX19	522.376	0.204569	0.109598	1.86653	0.0619666	0.250931
COPA	1702.99	0.210525	0.120693	1.7443	0.0811062	0.292447
SUMO1P3	48.0714	-0.00961332	0.218243	-0.0440487	0.964866	0.986291
NCSTN	544.845	0.201807	0.128893	1.5657	0.11742	0.3557
NHLH1	3.39296	0.275032	0.313614	0.876976	0.3805	0.66105
VANGL2	204.865	0.335102	0.24543	1.36537	0.172137	0.438519
SLAMF6	37.0849	0.581048	0.251004	2.31489	0.0206189	0.132313
CD84	379.326	0.221283	0.177355	1.24768	0.212147	0.489116
SLAMF1	21.3667	0.198827	0.256961	0.773765	0.43907	0.709305
CD48	86.7609	0.33374	0.242861	1.3742	0.169378	0.434765
SLAMF7	94.6864	0.261609	0.232446	1.12546	0.260395	0.544185
LY9	25.99	0.524306	0.250193	2.09561	0.0361168	0.185454
CD244	11.8761	0.418211	0.26553	1.575	0.115255	0.35173
ITLN1	1.85951	1.01654	0.31428	3.23451	0.00121851	0.0258989
LOC101928372	1.19774	0.852415	0.304314	2.8011	0.00509282	0.0589841
ITLN2	1.19197	0.909273	0.297085	3.06065	0.00220859	0.0372826
F11R	1149.95	-0.019159	0.156869	-0.122133	0.902793	0.962844
TSTD1	167.562	0.0446232	0.155446	0.287065	0.774063	0.907912
USF1	232.653	-0.0241941	0.129827	-0.186356	0.852165	0.942856
ARHGAP30	232.023	0.255313	0.161861	1.57736	0.114713	0.350984
PVRL4	362.985	0.170663	0.230826	0.739358	0.45969	0.724229
KLHDC9	38.2884	-0.0862599	0.246274	-0.35026	0.726144	0.887057
PFDN2	46.7328	0.706814	0.157589	4.48519	7.29e-06	0.00131957
NIT1	149.694	0.134268	0.137373	0.977393	0.328374	0.612433
DEDD	180.696	-0.0331999	0.119901	-0.276893	0.781862	0.911717
UFC1	316.505	0.332037	0.150984	2.19915	0.027867	0.158231
USP21	162.895	0.0728351	0.160294	0.454385	0.649552	0.845523
PPOX	105.756	0.0167403	0.170774	0.0980265	0.921911	0.969643
B4GALT3	213.209	-0.0595171	0.159618	-0.372873	0.709243	0.877552
ADAMTS4	157.11	0.36731	0.250691	1.46519	0.142868	0.395411
NDUFS2	424.853	0.377378	0.142638	2.64571	0.00815188	0.0775994
FCER1G	108.517	0.587869	0.197302	2.97954	0.00288684	0.0433196
APOA2	2.06648	-0.126409	0.320579	-0.394314	0.693349	0.869259
TOMM40L	79.7926	0.035726	0.191287	0.186766	0.851844	0.942761
MIR5187	0.742099	0.313969	0.28979	1.08344	0.278614	0.563717
NR1I3	11.1749	0.375618	0.25716	1.46064	0.144114	0.397008
PCP4L1	6.73469	0.190843	0.306219	0.623224	0.533137	0.772294
MPZ	6.33882	-0.12483	0.282288	-0.442208	0.658339	0.850307
SDHC	389.412	0.39049	0.139256	2.80412	0.00504538	0.0586808
CFAP126	90.2344	0.528763	0.165693	3.19122	0.00141675	0.0283128
FCGR2A	265.054	0.122501	0.159805	0.766569	0.443338	0.712308
HSPA6	28.2529	-0.288484	0.241353	-1.19528	0.231979	0.512122
FCGR3A	366.792	0.408109	0.226293	1.80346	0.0713162	0.270923
FCGR2C	67.4109	-0.36291	0.24275	-1.49499	0.134916	0.383126
HSPA7	74.7872	-0.302858	0.248928	-1.21665	0.223737	0.502175
FCGR3B	6.77171	-0.14746	0.305014	-0.483454	0.628773	0.834162
FCGR2B	48.9016	0.321909	0.187292	1.71875	0.085659	0.300661
RPL31P11	2.96381	0.969285	0.310844	3.11824	0.00181937	0.0331904
FCRLA	8.38135	0.639911	0.291705	2.1937	0.0282573	0.159596
FCRLB	19.5663	0.311006	0.316812	0.981672	0.326262	0.610724
DUSP12	106.641	-0.291532	0.136485	-2.13601	0.0326788	0.174784
ATF6	861.102	-0.0473779	0.104068	-0.455261	0.648922	0.845067
OLFML2B	276.265	0.0545612	0.203192	0.268521	0.788298	0.914893
NOS1AP	252.935	0.223668	0.265403	0.842747	0.39937	0.67584
MIR4654	7.16132	0.457328	0.306015	1.49446	0.135054	0.383256
MIR556	4.23643	0.609093	0.282241	2.15806	0.0309231	0.168539
C1orf111	60.2677	0.141592	0.297483	0.475966	0.634099	0.836988
C1orf226	285.061	0.161243	0.259228	0.622013	0.533933	0.773097
SH2D1B	9.61928	0.200166	0.290697	0.688573	0.491092	0.745734
UHMK1	2952.3	-0.282205	0.17982	-1.56937	0.116561	0.354022
UAP1	517.053	-0.0298909	0.186827	-0.159993	0.872887	0.94955
DDR2	265.777	0.124442	0.159619	0.779622	0.435613	0.705937
HSD17B7	75.479	-0.134221	0.181579	-0.739189	0.459792	0.724346
C1orf110	1.25837	1.06406	0.315773	3.3697	0.000752504	0.019732
RGS4	98.0068	0.486932	0.219385	2.21953	0.0264508	0.152994
RGS5	1355.1	0.0393063	0.243175	0.161638	0.871591	0.949061
LOC101928404	9.37321	0.860666	0.253996	3.38851	0.00070274	0.0189125
NUF2	31.5912	-0.0718852	0.268752	-0.267477	0.789102	0.915158
LOC100422212	1.97367	1.14918	0.301054	3.81719	0.00013498	0.00704464
PBX1	2670.37	0.102867	0.187051	0.54994	0.582361	0.805697
LOC100505795	94.9641	-0.142668	0.192347	-0.741721	0.458256	0.722997
LMX1A	4.58241	0.649863	0.320582	2.02714	0.0426486	0.203179
RXRG	4.23342	0.714158	0.320277	2.22981	0.0257599	0.150912
LOC400794	2.03334	0.583187	0.309576	1.88383	0.0595885	0.246135
LRRC52	1.07972	0.77195	0.300978	2.56481	0.0103233	0.0885056
MGST3	261.842	0.111383	0.162848	0.683969	0.493995	0.748049
ALDH9A1	547.507	0.0169518	0.137854	0.122969	0.902131	0.9628
LOC440700	1.70312	0.663128	0.320581	2.06852	0.038591	0.19194
TMCO1	557.714	0.00970141	0.149038	0.0650935	0.9481	0.979867
LOC100147773	21.9547	-0.255696	0.219829	-1.16316	0.244765	0.527403
UCK2	300.17	-0.389574	0.155208	-2.51002	0.0120725	0.0964601
MIR3658	0	NA	NA	NA	NA	NA
FAM78B	8.07945	0.169906	0.250976	0.67698	0.498419	0.749977
MIR921	1.42052	0.327043	0.318645	1.02636	0.304723	0.590469
FMO9P	2.27753	1.35605	0.319134	4.24914	2.15e-05	0.00237259
POGK	637.562	-0.158806	0.138265	-1.14856	0.250737	0.533519
TADA1	146.814	-0.262156	0.146719	-1.7868	0.0739704	0.276442
ILDR2	27.6903	0.0615977	0.219901	0.280115	0.779389	0.910841
MAEL	6.11265	0.710713	0.310071	2.2921	0.0219001	0.136894
GPA33	3.50462	0.953954	0.310118	3.0761	0.00209725	0.0361751
DUSP27	4.88176	0.902316	0.311042	2.90094	0.00372043	0.0496408
LINC01363	1.46747	1.125	0.310701	3.62083	0.000293655	0.0113586
POU2F1	808.167	-0.0495524	0.108251	-0.457754	0.647129	0.843989
CD247	23.0103	0.528259	0.237473	2.22451	0.0261145	0.151755
CREG1	550.875	-0.239317	0.135462	-1.76667	0.0772838	0.283841
RCSD1	133.408	0.242282	0.159453	1.51945	0.128648	0.373288
MPZL1	1312.84	-0.114876	0.149567	-0.768056	0.442454	0.711596
ADCY10	20.5314	0.79951	0.24761	3.2289	0.00124266	0.0262215
MPC2	308.707	0.0645246	0.174025	0.370777	0.710803	0.878529
DCAF6	659.929	-0.114331	0.144522	-0.791102	0.428885	0.700625
MIR1255B2	1.59557	-0.232852	0.320574	-0.726362	0.467617	0.729109
GPR161	145.748	-0.309018	0.130769	-2.36309	0.0181233	0.122647
TIPRL	383.458	-0.316477	0.186793	-1.69427	0.0902149	0.308528
SFT2D2	239.271	-0.128626	0.129832	-0.990714	0.321825	0.606286
ANKRD36BP1	399.31	-0.53998	0.209178	-2.58144	0.00983897	0.0864021
TBX19	31.5934	0.112104	0.161603	0.693697	0.487872	0.743363
MIR557	0.297966	0.151533	0.259057	0.584942	0.558586	0.790991
LOC100505918	3.75746	0.576962	0.315747	1.82729	0.0676557	0.262762
LOC101928565	1.53924	0.459275	0.298182	1.54025	0.123499	0.365564
XCL2	2.08539	0.861898	0.320424	2.68986	0.00714812	0.0714723
XCL1	3.99246	0.934457	0.312156	2.99356	0.00275742	0.042297
DPT	213.594	0.360629	0.249813	1.4436	0.148853	0.404043
LINC00626	1.86207	0.628681	0.320308	1.96274	0.0496765	0.221585
LINC00970	2.7618	0.613154	0.313425	1.9563	0.0504292	0.223411
ATP1B1	691.462	0.0872898	0.217106	0.40206	0.68764	0.865782
NME7	85.1621	-0.0448989	0.169325	-0.265164	0.790883	0.915999
BLZF1	174.194	-0.227971	0.1386	-1.64481	0.100009	0.327122
CCDC181	25.2676	-0.28346	0.209868	-1.35066	0.176806	0.444771
SLC19A2	740.058	-0.342728	0.214149	-1.60042	0.109505	0.342279
F5	52.877	0.512774	0.250517	2.04686	0.0406716	0.197407
SELP	45.7011	0.412243	0.265072	1.55521	0.119896	0.359618
SELL	82.8775	0.441817	0.265105	1.66657	0.0956	0.319125
SELE	60.8943	1.28622	0.285799	4.50044	6.78e-06	0.00129843
METTL18	49.8241	-0.0969374	0.203523	-0.476296	0.633864	0.836721
C1orf112	164.416	-0.293556	0.148604	-1.97543	0.0482199	0.218048
SCYL3	264.773	-0.0625098	0.135436	-0.461543	0.644409	0.84251
KIFAP3	359.57	-0.306511	0.137237	-2.23344	0.02552	0.15018
METTL11B	2.89822	0.440702	0.315498	1.39685	0.162459	0.425212
MIR3119-2	0	NA	NA	NA	NA	NA
MIR3119-1	0	NA	NA	NA	NA	NA
LINC01142	2.37927	0.700163	0.320412	2.18519	0.0288747	0.161476
LOC101928650	4.13892	0.142264	0.295196	0.48193	0.629855	0.834487
GORAB	100.253	-0.351792	0.204456	-1.72063	0.0853182	0.300224
PRRX1	1144.39	-0.107907	0.188581	-0.572206	0.567183	0.796977
MROH9	38.6998	0.0446433	0.302217	0.147719	0.882564	0.953942
FMO3	35.1213	-0.0782186	0.280055	-0.279298	0.780016	0.911058
MIR1295A	0.13577	0.0748781	0.16804	0.445598	0.655888	0.848942
MIR1295B	0	NA	NA	NA	NA	NA
FMO6P	21.8673	-0.108887	0.296282	-0.367511	0.713238	0.879787
FMO2	214.438	0.125623	0.289534	0.433879	0.664376	0.853347
FMO1	53.6178	0.112744	0.214766	0.524963	0.599609	0.816234
FMO4	60.312	0.0742559	0.185992	0.399243	0.689714	0.866852
TOP1P1	14.0364	-0.0876707	0.236751	-0.370308	0.711153	0.878772
PRRC2C	2634.79	-0.0207414	0.119953	-0.172914	0.862719	0.947889
MYOC	4.34577	0.504042	0.31508	1.59973	0.109659	0.342434
VAMP4	260.893	-0.350215	0.207237	-1.68993	0.0910422	0.310029
METTL13	272.98	0.141714	0.143904	0.984784	0.32473	0.609029
DNM3	144.195	-0.283369	0.20416	-1.38797	0.165146	0.428929
DNM3-IT1	3.53693	-0.185803	0.300553	-0.618205	0.53644	0.775061
DNM3OS	409.516	-0.74224	0.245543	-3.02285	0.00250406	0.0401066
MIR214	0	NA	NA	NA	NA	NA
MIR3120	0	NA	NA	NA	NA	NA
MIR199A2	0	NA	NA	NA	NA	NA
C1orf105	5.43085	0.480491	0.285929	1.68045	0.092869	0.31328
[truncated: 24,476 more rows]

## Sheet: S12
	P1_Pre	P2_Pre	P3_Pre	P4_Pre	P5_Pre	P6_Pre	P7_Pre	P8_Pre	P9_Pre	P10_Pre	P11_Pre	P1_Post	P2_Post	P3_Post	P4_Post	P5_Post	P6_Post	P7_Post	P8_Post	P9_Post	P10_Post	P11_Post	P12_Pre	P13_Pre	P14_Pre	P15_Pre	P16_Pre	P17_Pre	P18_Pre	P19_Pre	P20_Pre	P21_Pre	P22_Pre	P12_Post	P13_Post	P14_Post	P15_Post	P16_Post	P17_Post	P18_Post	P19_Post	P20_Post	P21_Post	P22_Post
STAT1_score	0.332699	0.312343	0.229068	0.318429	0.197665	0.251134	0.221716	0.221778	0.235118	0.424723	0.254365	0.259285	0.360584	0.36036	0.394116	0.232706	0.124041	0.266244	0.259595	0.331854	0.426833	0.220969	0.193554	0.217466	0.239965	0.250809	0.238429	0.232722	0.461917	0.207355	0.382558	0.24054	0.314678	0.240507	0.256676	0.314182	0.316935	0.234895	0.327881	0.487799	0.199406	0.391788	0.371617	0.214083
Module3_IFN_score	0.514014	0.553877	0.517952	0.519726	0.309785	0.394664	0.366262	0.323028	0.37701	0.722357	0.366064	0.492308	0.61926	0.623254	0.602992	0.382151	0.291795	0.340921	0.320317	0.39316	0.568326	0.348791	0.259853	0.453644	0.645514	0.375112	0.332996	0.351897	0.679181	0.297504	0.643727	0.34281	0.478302	0.29703	0.467331	0.657014	0.449544	0.331058	0.479955	0.732436	0.252722	0.632909	0.48688	0.355779
IFNG_score_21050467	0.4467	0.447389	0.456848	0.455614	0.420545	0.428999	0.45013	0.428447	0.442414	0.503468	0.443707	0.465021	0.484743	0.509378	0.502242	0.461183	0.418513	0.466628	0.452054	0.492367	0.47959	0.446364	0.405187	0.482555	0.455211	0.470673	0.432149	0.460687	0.503071	0.437129	0.488634	0.457585	0.476015	0.445706	0.493152	0.476591	0.497142	0.452824	0.499464	0.52616	0.44001	0.491684	0.478507	0.451759
Interferon_19272155	0.603026	0.604832	0.612463	0.572139	0.324494	0.43376	0.428729	0.335088	0.407177	0.790266	0.377795	0.635445	0.703551	0.716984	0.711816	0.431882	0.276223	0.375197	0.340731	0.46046	0.604559	0.356668	0.271345	0.582617	0.743828	0.435108	0.404932	0.367548	0.739965	0.334346	0.712487	0.363411	0.517405	0.300319	0.581279	0.758439	0.514994	0.379588	0.501794	0.78581	0.283381	0.683903	0.500112	0.412504
MHC.I_19272155	0.49232	0.557514	0.525623	0.497628	0.460528	0.542456	0.491155	0.489323	0.532622	0.536095	0.497327	0.482972	0.613514	0.611567	0.624006	0.57258	0.510275	0.52471	0.555903	0.635039	0.570386	0.512135	0.467109	0.566786	0.609463	0.552116	0.502226	0.577288	0.634516	0.553626	0.596118	0.587259	0.587866	0.53021	0.545453	0.618722	0.505176	0.487689	0.565014	0.636831	0.536998	0.588343	0.559142	0.519611
MHC.II_19272155	0.714554	0.641553	0.552699	0.692808	0.547719	0.641442	0.580583	0.614378	0.619855	0.696823	0.654189	0.638005	0.696875	0.721457	0.721659	0.633635	0.459515	0.636407	0.653454	0.754544	0.751198	0.613807	0.574797	0.56327	0.387229	0.629612	0.594176	0.622271	0.771458	0.679211	0.691397	0.600762	0.681636	0.63331	0.62064	0.581807	0.695641	0.640631	0.692555	0.754085	0.699723	0.687561	0.717895	0.580524
STAT1_19272155	0.415978	0.476859	0.344544	0.439374	0.231507	0.316155	0.21288	0.286846	0.324765	0.57952	0.341353	0.278053	0.456699	0.533903	0.422448	0.304228	0.142462	0.321377	0.336489	0.454839	0.53924	0.269521	0.170286	0.337016	0.283194	0.297661	0.284439	0.334378	0.60521	0.219552	0.505405	0.275205	0.428103	0.247135	0.300151	0.353683	0.441905	0.252959	0.452826	0.674656	0.155905	0.523823	0.445302	0.223499
Interferon_Cluster_21214954	0.469401	0.514188	0.492246	0.493505	0.325655	0.403512	0.376014	0.338779	0.377339	0.670422	0.38848	0.489764	0.599321	0.5948	0.6154	0.421581	0.321045	0.352686	0.346591	0.441127	0.529787	0.377496	0.302284	0.467634	0.616453	0.404386	0.331613	0.3954	0.639622	0.323409	0.601154	0.374835	0.469587	0.345637	0.47877	0.628474	0.442655	0.338446	0.488071	0.679117	0.294986	0.583211	0.483152	0.376578
IFN_21978456	0.553731	0.552419	0.536219	0.515923	0.287263	0.379201	0.381807	0.270839	0.354238	0.746874	0.326745	0.590726	0.658847	0.653771	0.664877	0.373873	0.253009	0.329853	0.296291	0.409907	0.554512	0.316712	0.227537	0.480726	0.688725	0.351483	0.328936	0.313896	0.691412	0.280447	0.661595	0.315156	0.467881	0.261553	0.49144	0.70313	0.425017	0.321869	0.460722	0.749698	0.227247	0.636215	0.467139	0.342347
APM1	0.691069	0.767413	0.749053	0.729848	0.656774	0.722928	0.666969	0.68044	0.697361	0.794815	0.702144	0.69354	0.795401	0.812948	0.806244	0.739494	0.694931	0.690553	0.747468	0.792211	0.773815	0.724811	0.646017	0.793339	0.754987	0.749491	0.665794	0.745091	0.815356	0.687355	0.762384	0.736078	0.752073	0.699176	0.744749	0.77855	0.733109	0.676967	0.764311	0.798391	0.690891	0.760262	0.71512	0.698326
APM2	0.467895	0.370821	0.343996	0.448205	0.328362	0.394363	0.350926	0.370813	0.361246	0.500771	0.420454	0.411815	0.474141	0.504776	0.520033	0.442257	0.255455	0.414681	0.471874	0.575532	0.608045	0.397476	0.321429	0.454895	0.163995	0.434088	0.318565	0.426955	0.552146	0.459633	0.472361	0.378863	0.419058	0.432222	0.41918	0.329896	0.467075	0.363925	0.497516	0.486969	0.452146	0.436318	0.476379	0.26529
IFIT3	0.56894	0.621762	0.560532	0.563721	0.295256	0.424087	0.420391	0.310185	0.412949	0.784883	0.321933	0.587842	0.703836	0.667	0.658693	0.367793	0.268971	0.352998	0.299789	0.408745	0.595974	0.264704	0.292651	0.478317	0.68772	0.384805	0.366485	0.326892	0.738557	0.310837	0.70419	0.31688	0.512198	0.254099	0.503945	0.731842	0.501514	0.366485	0.491534	0.780145	0.239574	0.694158	0.489456	0.430275
ISG.RS	0.455841	0.468942	0.451142	0.448801	0.328508	0.355969	0.353597	0.329441	0.360976	0.580224	0.371199	0.477923	0.536837	0.54161	0.559896	0.408782	0.324417	0.345043	0.37772	0.427547	0.482332	0.377095	0.282231	0.440188	0.536674	0.412711	0.36296	0.390291	0.578085	0.331775	0.538137	0.365042	0.435381	0.330646	0.444462	0.546558	0.431175	0.349315	0.448126	0.605634	0.312503	0.52424	0.44948	0.374532
IFNG.GS	0.425891	0.433807	0.38406	0.429255	0.358821	0.415897	0.382389	0.39115	0.404563	0.487915	0.4015	0.394116	0.46129	0.462808	0.467019	0.39593	0.342288	0.41715	0.409987	0.466158	0.49589	0.395744	0.374324	0.385891	0.358482	0.402946	0.39481	0.402518	0.510504	0.380994	0.460549	0.395275	0.441317	0.40757	0.405272	0.414982	0.438719	0.407801	0.464631	0.5239	0.382313	0.465097	0.445485	0.399001
ICR	0.106897	0.0495134	-0.0574732	0.0810845	-0.0791306	-0.00986723	-0.101839	-0.0124095	0.00668803	0.170237	-0.00203732	-0.0184403	0.0734125	0.13936	0.123794	-0.0363087	-0.128609	-0.00843599	0.0749318	0.16534	0.197449	-0.0195136	-0.0925755	-0.0804069	-0.068815	-0.0517281	-0.047388	-0.0238692	0.25453	-0.0935784	0.117841	0.00480185	0.0712042	-0.0440467	-0.0248897	-0.0367916	0.059387	-0.0748282	0.0999904	0.277936	-0.113401	0.121187	0.147716	-0.0677518
TIS	0.343332	0.294022	0.234004	0.322893	0.202264	0.267326	0.195473	0.265938	0.260803	0.398042	0.298206	0.266127	0.339117	0.374546	0.380491	0.287002	0.116962	0.268386	0.334619	0.413758	0.453554	0.292271	0.200328	0.18841	0.1536	0.252221	0.249117	0.262585	0.467102	0.235366	0.331283	0.266665	0.312231	0.253286	0.247699	0.219311	0.316134	0.24702	0.336217	0.475739	0.220251	0.330167	0.381667	0.185019
T_Cell_Palmer	0.36497	0.331732	0.309219	0.356811	0.31937	0.362729	0.341049	0.339784	0.360154	0.365885	0.345663	0.338656	0.367736	0.357393	0.391832	0.345542	0.31741	0.371772	0.369283	0.413112	0.414329	0.343456	0.35325	0.330428	0.296685	0.338918	0.36696	0.360133	0.410267	0.353089	0.366522	0.364155	0.374523	0.380091	0.347597	0.341038	0.364456	0.366247	0.398879	0.408513	0.360026	0.378396	0.413192	0.35049
T_Cells_Bindea	0.169583	0.141396	-0.00844976	0.157523	0.0388112	0.10667	0.0146445	0.137411	0.151253	0.219328	0.0918929	0.100509	0.201548	0.16788	0.208026	0.0938173	0.0351132	0.13606	0.168479	0.232171	0.343629	0.10783	0.128834	0.00215205	0.00785302	0.0988204	0.0988147	0.0846928	0.314483	0.0537166	0.224351	0.168466	0.209266	0.173322	0.0896225	0.118793	0.182683	0.0964942	0.218528	0.353732	0.0766966	0.232512	0.271268	0.12569
T_Cell_cluster_Iglesia	0.0575901	0.000854297	-0.158669	0.0191651	-0.100449	0.00315796	-0.108705	-0.00503638	-0.0146185	0.100536	-0.0500056	-0.0442628	0.0848235	0.032274	0.130482	-0.0190617	-0.184644	-0.00729876	0.0398603	0.123292	0.20286	-0.0325549	-0.0450785	-0.141304	-0.152858	-0.0601082	-0.0497387	-0.0392826	0.250798	-0.100438	0.0964205	0.0285271	0.0453609	0.0332304	-0.0876454	-0.108358	0.0153945	-0.0869884	0.0685576	0.236817	-0.111369	0.060521	0.121552	-0.0909508
CD8_Palmer	0.0459897	0.0347379	-0.0839847	0.0135066	0.0123108	-0.0222244	-0.0393765	0.0198427	0.044261	0.0669926	-0.0238675	0.0408195	0.0799757	0.0471963	0.138885	0.0690563	0.0489148	0.0171247	0.133134	0.207056	0.1672	0.0125842	0.0211469	0.000101207	0.00565981	0.0411508	0.00519854	0.0280963	0.152273	-0.0319457	0.0422148	0.0872432	0.0759302	0.0737654	0.0252321	-0.0370056	0.0621246	-0.0213546	0.0828213	0.123675	0.0160672	0.0183998	0.14194	-0.0033366
CD8_cluster_Iglesia	0.0623979	-0.00690913	-0.148372	0.0230796	-0.0913457	-0.011057	-0.112848	-0.00443992	-0.00819599	0.0943722	-0.0362632	-0.0305902	0.0829403	0.0306245	0.133943	0.00342297	-0.180028	-0.0140806	0.0451236	0.130741	0.218509	-0.0177112	-0.0385788	-0.128233	-0.14405	-0.0564613	-0.0619885	-0.0338635	0.247467	-0.0929752	0.0904818	0.0309517	0.046396	0.024452	-0.068193	-0.0979421	0.0272919	-0.0970784	0.0748761	0.238288	-0.0936187	0.0630561	0.143396	-0.08999
LCK_Rody	0.26271	0.209709	0.0612034	0.226678	0.0885107	0.218319	0.127457	0.194908	0.186012	0.318655	0.16819	0.185144	0.29966	0.241574	0.326864	0.148004	0.0359652	0.22463	0.227394	0.33818	0.385818	0.151282	0.16988	0.0795804	0.0261584	0.154043	0.179533	0.146641	0.435761	0.161442	0.287859	0.208285	0.260404	0.240071	0.152034	0.148301	0.243213	0.177029	0.277309	0.437227	0.188755	0.29908	0.339271	0.155666
TNBC_T-Cell_Rody	0.318436	0.261267	0.135912	0.293916	0.157539	0.258867	0.193877	0.249035	0.229085	0.376999	0.22275	0.231764	0.346078	0.30952	0.395903	0.196255	0.0649501	0.277808	0.273171	0.350088	0.43795	0.194788	0.205975	0.120878	0.0612935	0.19692	0.231676	0.191358	0.490602	0.206188	0.350715	0.245831	0.311834	0.290655	0.19554	0.190756	0.289	0.229953	0.331823	0.506454	0.218449	0.358349	0.384819	0.147033
CD8_TRM_Signature_Up	0.244549	0.192076	0.190207	0.210317	0.177868	0.21226	0.20255	0.200374	0.192714	0.22358	0.200238	0.205723	0.206105	0.223581	0.221216	0.194817	0.163404	0.220906	0.203153	0.236854	0.258929	0.195344	0.199948	0.179093	0.146794	0.187529	0.21125	0.193275	0.26364	0.212354	0.212256	0.208416	0.219196	0.226	0.194149	0.187305	0.221983	0.221367	0.23168	0.267897	0.217475	0.217312	0.265923	0.204722
CD4_Th1_signature	0.269941	0.27031	0.177128	0.272934	0.119614	0.229491	0.175286	0.221886	0.183724	0.322434	0.192308	0.12914	0.231807	0.233843	0.243121	0.166207	0.111011	0.228517	0.176484	0.25394	0.301335	0.0950474	0.151658	0.157261	0.127292	0.140952	0.174971	0.185162	0.350043	0.139294	0.288639	0.184572	0.260661	0.182697	0.15123	0.161574	0.190894	0.172944	0.257861	0.362698	0.0921232	0.265384	0.272991	0.174081

## Sheet: S13
Signatures	pvalue	FDR
STAT1_score	0.0424981	0.0887697
Module3_IFN_score	0.388045	0.421788
IFNG_score_21050467	0.00109148	0.0259459
Interferon_19272155	0.353498	0.401702
MHC.I_19272155	0.209928	0.262409
MHC.II_19272155	0.0358753	0.0887697
STAT1_19272155	0.353498	0.401702
Interferon_Cluster_21214954	0.12888	0.179
IFN_21978456	0.176192	0.231831
APM1	0.0984106	0.144721
APM2	0.0461602	0.0887697
IFIT3	0.50284	0.523792
ISG.RS	0.0634193	0.0990927
IFNG.GS	0.0114727	0.0530303
ICR	0.0461602	0.0887697
TIS	0.0542455	0.0904091
T_Cell_Palmer	0.00415134	0.0259459
T_Cells_Bindea	0.00285149	0.0259459
T_Cell_cluster_Iglesia	0.0542455	0.0904091
CD8_Palmer	0.00367117	0.0259459
CD8_cluster_Iglesia	0.0424981	0.0887697
LCK_Rody	0.0189567	0.0677024
TNBC_T-Cell_Rody	0.0358753	0.0887697
CD8_TRM_Signature_Up	0.0127273	0.0530303
CD4_Th1_signature	0.923966	0.923966

## Sheet: S14
	aDC	pDC	Eosinophils	Macrophages	Mast.cells	Monocytes	Neutrophils	NKT	CD4..Tcm	CD4..Tem	CD8..T.cells	CD8..Tcm	CD8..Tem	Th1.cells
Mo CX3CR1+	-0.061823	-0.0519751	0.017398	-0.0138965	-0.0611664	-0.12091	0.310647	-0.155487	-0.139074	0.0471605	-0.301455	0.0204618	-0.246526	-0.139512
Mo CD192+	-0.563112	-0.0514308	-0.0133501	-0.437052	-0.196969	-0.48717	-0.00251682	-0.530175	-0.359468	0.036111	-0.637194	-0.444384	-0.507851	-0.375773
Mo CD192+DR-	0.0436734	0.108472	-0.0723511	0.0896454	0.04838	-0.0627189	0.0600919	-0.217929	-0.307356	0.0674256	0.205013	-0.205998	-0.0283494	0.0932574
Mo CX3CR1+DR-	-0.0466262	-0.374432	-0.321348	-0.173042	-0.293001	-0.280195	-0.165928	-0.0924862	0.0665463	-0.272643	-0.199092	-0.154545	-0.219449	-0.100914
Mo VISTA+DR+	0.264485	0.26744	0.287246	0.230344	0.337364	0.142146	-0.0488045	0.200799	0.126498	0.324561	0.382776	0.369207	0.279039	0.270942
T CX3CR1+	-0.19292	-0.0115993	0.0984844	-0.18712	0.0379712	-0.106582	0.0495705	-0.25409	-0.0493516	0.0434426	-0.0838212	-0.23297	-0.186464	-0.0874323
CMo CX3CR1+	-0.0757277	-0.13909	-0.0444299	-0.133837	-0.0710221	-0.0516524	0.24513	-0.180784	-0.0269206	-0.0019698	-0.250602	-0.0506675	-0.237142	-0.130991
CMo DR+	0.0292155	-0.100558	-0.0863333	-0.142138	-0.0848014	0.039501	-0.184375	0.136886	0.288762	-0.159427	-0.202757	0.0707955	0.0686071	-0.0928986
IMo	-0.0760477	0.44611	0.0202429	0.0983696	0.244994	0.0539446	0.298173	-0.00755006	0.106029	0.0889594	-0.232301	0.0184922	-0.0780173	0.192034
IMo CD192+	-0.145858	-0.127038	-0.124193	-0.102309	-0.0734216	-0.0926797	0.226174	-0.26841	-0.0697013	0.0648867	-0.316993	0.0263705	-0.230988	-0.116752
IMo CX3CR1+	-0.13229	-0.107342	-0.0762666	-0.0955247	-0.0716709	-0.187876	0.0289966	-0.347193	-0.237116	-0.0535069	-0.239085	-0.196411	-0.218952	-0.115658
B	0.165335	0.277383	0.303644	0.254404	0.443484	0.248714	0.161396	0.331656	0.333625	0.295328	0.0747347	0.380895	0.388336	0.443046
NK-like T	-0.0820704	0.192154	0.196641	0.184713	0.239755	0.0182743	-0.0958582	-0.0302019	0.0177272	0.232533	-0.237566	0.121792	-0.0737539	0.172238
T LAG3+	-0.274349	-0.184395	-0.267236	-0.410374	-0.355658	-0.231889	-0.355439	-0.450865	-0.290983	-0.11392	-0.313964	-0.498577	-0.458963	-0.513023
NK CD56bright	-0.191409	-0.127934	0.184295	0.116553	0.0814227	0.103639	0.337182	-0.0517647	0.0621614	0.209357	-0.0233105	0.268782	-0.0290014	-0.00984952
NK CD56dim	0.399934	-0.0346865	-0.356166	-0.207134	-0.17956	0.120035	-0.137324	0.174089	0.255061	-0.59361	0.164679	-0.0309662	0.129008	-0.0141153
NK	0.340847	-0.14739	-0.36098	-0.207353	-0.262283	0.136886	-0.131415	0.140825	0.249152	-0.628625	0.15505	-0.0747347	0.0806434	-0.0697013
T CD4+CD127hiCD25+	-0.0362244	0.169083	0.137018	0.0418057	0.0562517	-0.153105	0.278741	0.165472	0.239891	0.0481532	-0.0936799	0.116443	0.073762	0.143475
Treg	-0.0677354	-0.182196	-0.339224	-0.167424	-0.232314	-0.0762707	-0.32467	-0.189747	-0.212508	-0.242272	-0.314931	-0.248837	-0.0456311	-0.239974
T CD4+25+	-0.194233	-0.0453028	-0.282213	-0.308147	-0.196859	-0.107457	-0.307381	-0.210428	-0.151119	-0.175631	-0.137112	-0.350386	-0.150025	-0.269738
T CD4+LAG3+	0.00667652	-0.134625	-0.105292	-0.137033	-0.21135	-0.0872325	-0.404641	-0.232474	-0.0212335	0.0051442	-0.138893	-0.205549	-0.212116	-0.259727
T CD4+TIM3+	-0.355509	0.137324	-0.174746	-0.114783	-0.100996	-0.364482	0.177153	-0.392931	-0.191378	-0.122223	-0.576321	-0.256374	-0.380895	-0.170806
T CD8+CD25+	-0.200153	0.0758372	-0.174874	-0.0715693	0.0753994	-0.210987	-0.197527	-0.220727	-0.119392	0.141935	-0.0860144	-0.272051	-0.155614	-0.157584
T CD8+LAG3	-0.214282	-0.15015	-0.343311	-0.369029	-0.1913	-0.255103	-0.436662	-0.536799	-0.237373	-0.0444323	-0.288372	-0.429767	-0.360274	-0.388837
T CD8+PD1+LAG3+	-0.294346	-0.342182	-0.412238	-0.518527	-0.433912	-0.412785	-0.402058	-0.575119	-0.351377	-0.138142	-0.494116	-0.536698	-0.549286	-0.628537
T CD8+TIM3+	-0.303425	0.11719	0.043659	0.0918044	0.100558	-0.307364	0.124412	-0.20407	-0.252872	0.21173	-0.352883	-0.0699201	-0.126381	-0.061823
NK TIM3+	-0.0539446	0.532334	0.386366	0.237116	0.499945	0.0933363	0.237116	0.0942116	0.0758289	0.422037	0.0167414	0.169056	0.2288	0.337345
T CD8+CD28-	-0.141919	0.175183	0.337345	0.22486	0.406937	0.0596345	0.113689	0.0390634	-0.168399	0.474778	0.174746	0.291389	0.0939928	0.163803
T CD8+CD28-PD1+	-0.134697	0.104278	0.282197	0.14739	0.313273	0.0758289	0.0412518	0.120035	-0.229456	0.36667	0.0502243	0.287231	0.0416895	0.0399387
T CD4+PD1+TIM3+LAG3+	-0.160092	-0.103409	-0.256278	-0.357608	-0.328281	-0.230891	-0.382338	-0.416808	-0.255075	-0.032281	-0.332549	-0.358812	-0.417793	-0.458062
T CD8+PD1+TIM3+LAG3+	-0.0852484	-0.115561	-0.403042	-0.468046	-0.381156	-0.322718	-0.446706	-0.399212	-0.0420223	-0.259247	-0.377763	-0.435434	-0.344386	-0.266579
TEM	-0.251354	0.452591	0.344696	0.220386	0.449308	-0.0736445	0.240411	-0.148164	-0.111287	0.481261	-0.172129	0.162609	-0.0724408	0.186026
TN/TSCM	0.0565707	-0.241055	-0.151767	-0.119597	-0.428603	-0.240836	-0.209323	-0.0644491	-0.022869	-0.206915	-0.204289	-0.208666	-0.109531	-0.237553
TEMRA	-0.0799869	0.171244	0.459678	0.173214	0.259438	-0.254404	0.399934	0.00448627	-0.243024	0.396214	0.0773608	0.169712	0.00995733	0.0817376
TN	-0.0107239	-0.179789	-0.230344	-0.182524	-0.360672	-0.130218	-0.415276	-0.0478197	-0.0228703	-0.22356	-0.176944	-0.214368	-0.149149	-0.321059
TEM PD1+	0.0821753	0.250465	0.195317	0.181311	0.209323	0.161177	0.390962	0.112157	0.0482547	0.124412	0.220921	0.071452	0.226392	0.356822
T PD1+	-0.209444	-0.284401	-0.0156481	0.0486951	-0.197844	-0.0892926	-0.111835	-0.20638	0.0300925	0.0819609	-0.22739	0.0431143	-0.266017	-0.165673
T CD4+CD8+PD1+	-0.0664295	0.0119289	-0.0449795	-0.10725	-0.191409	-0.374282	-0.126949	-0.192941	-0.0180575	-0.0178386	-0.349549	-0.084487	-0.131327	-0.0468399
TEM CD4+CD8+	-0.195098	-0.0686071	-0.0699201	-0.0305285	-0.207572	-0.237116	-0.0605099	-0.314148	0.0289966	-0.0959624	-0.454207	-0.105591	-0.262283	-0.0482547
TN/SCM CD8+	0.0322792	-0.323558	-0.203195	-0.0983696	-0.418536	-0.116534	-0.228581	-0.0123646	0.0419083	-0.247401	-0.128351	-0.105373	-0.0204618	-0.201882
TEMRA CD8+PD1+	-0.0810811	0.0635737	0.164898	0.0764854	0.157019	0.0167414	0.347412	0.0410329	-0.292264	0.140387	0.180217	0.232082	-0.0629172	-0.108218
TCM CD8+	0.156809	-0.147398	-0.29228	-0.214368	-0.252777	0.182743	-0.493735	0.110084	0.149915	-0.436286	0.0782404	-0.0639055	0.0476008	-0.171363
TEMRA CD8+	-0.101548	0.156809	0.258029	0.201674	0.28265	-0.0538382	0.279477	-0.0470537	-0.145976	0.321935	0.141927	0.18712	0.032281	0.0832741
TN/SCM CD8+PD1+	-0.0359996	-0.367546	-0.299267	-0.0904913	-0.395776	-0.0377503	-0.35923	-0.0051428	0.099245	-0.283291	-0.146515	-0.0259328	-0.046504	-0.189189
T CD8+PD1+	-0.0386257	-0.0421271	0.154831	0.125725	0.00973848	-0.0101762	0.18897	0.00995733	0.112594	0.0491301	0.0200241	0.291607	-0.0546012	0.0848014
Mo	0.112819	0.000875417	-0.223888	-0.0257154	-0.0311867	0.00984844	0.00656563	0.0366581	-0.296219	0.0181649	0.212617	-0.0680637	0.0640149	-0.101658
M-MDSC	-0.338658	0.194223	0.0410329	0.0191487	0.102309	-0.128132	0.322683	-0.162053	-0.260751	0.0489113	-0.212605	-0.205821	-0.0316227	0.0602911
Mo PDL1+	-0.33802	0.0102862	-0.109208	-0.182196	-0.142036	-0.270176	-0.11074	-0.296985	-0.22356	0.0610603	-0.309788	-0.389014	-0.236691	-0.292061
PMN-MDSC	0.0443156	0.167743	-0.30058	-0.0191487	-0.01324	-0.0937739	0.0642302	-0.0246198	-0.162053	-0.0322792	-0.002079	0.0390634	-0.0342488	0.0333735
PMN-MDSC LOX1+	-0.275413	-0.0370938	-0.102965	0.130321	0.00558048	-0.165117	0.20604	-0.0852391	-0.0322792	0.117847	-0.373892	-0.00448627	-0.176496	0.000328263
DC	0.0775796	-0.0848014	-0.105154	0.0679505	0.106029	0.268848	-0.136011	0.129008	0.218295	-0.039501	-0.110406	0.192034	0.0449721	-0.0077689
DC CD16+	0.002079	0.182624	0.297954	0.0169603	0.107561	-0.109093	0.322245	0.0410329	-0.0447533	0.171244	0.0565707	-0.00229784	0.027027	0.133384
IMo CD192loCX3CR1dim	0.195437	-0.228156	0.0604038	0.200471	0.00689391	0.22356	-0.231329	0.195109	-0.00667506	0.107895	0.446025	0.159107	0.27696	0.0694862
NK-like T CD16-	-0.225298	0.179779	0.443922	0.219608	0.474122	0.136011	0.293796	0.0322792	-0.224204	0.475873	0.0644491	0.209323	0.0793303	0.178904
TEM CD8+PD1+	0.218295	0.364263	0.0681694	-0.0169603	0.154174	0.137105	0.0504432	0.113032	0.264033	-0.164898	0.144327	-0.146953	0.182186	0.355072
TCM CD8+PD1+	0.0477155	0.0397264	-0.311245	-0.154637	-0.157483	0.180246	-0.41959	0.00207934	0.202025	-0.365527	-0.0634747	-0.216471	-0.0953215	-0.0214501
Mo VISTA+	-0.10319	0.137769	0.023308	-0.270504	0.0588718	-0.279586	-0.0841495	-0.151994	0.0354544	0.111287	-0.168627	-0.229797	-0.0379712	-0.0942168

## Sheet: S15
	aDC	pDC	Eosinophils	Macrophages	Mast.cells	Monocytes	Neutrophils	NKT	CD4..Tcm	CD4..Tem	CD8..T.cells	CD8..Tcm	CD8..Tem	Th1.cells
Mo CX3CR1+	0.687097	0.98	0.813065	0.797193	0.535849	0.62125	0.231522	0.653947	0.465172	0.746102	0.130167	0.670556	0.104133	0.694222
Mo CD192+	0.00272167	0.650833	0.837164	0.03905	0.535849	0.0110444	0.960588	0.00449667	0.0417125	0.939706	0.001988	0.0402333	0.001775	0.0120154
Mo CD192+DR-	0.957937	0.98	0.837164	0.841077	0.99	0.682692	0.917538	0.76325	0.370435	0.871364	0.194478	0.562083	0.835968	0.73898
Mo CX3CR1+DR-	0.99	0.18815	0.273077	0.841077	0.30175	0.339565	0.960588	1	0.872951	0.55025	0.890149	0.950147	0.597045	0.911343
Mo VISTA+DR+	0.439524	0.293261	0.119813	0.391724	0.0862143	0.601957	0.917538	0.501176	0.679787	0.136929	0.104412	0.0793529	0.242379	0.213
T CX3CR1+	0.99	0.355	0.186069	0.841077	0.535849	0.757333	0.685088	0.821373	0.881774	0.636042	0.587115	0.432927	0.696346	0.873846
CMo CX3CR1+	0.825918	0.782203	0.722241	0.640392	0.535849	0.619362	0.26625	0.893226	0.929265	0.55025	0.26625	0.863833	0.225679	0.873846
CMo DR+	0.930345	0.98	0.874638	0.841077	0.734068	0.683704	0.373684	0.820444	0.420741	0.580909	0.335278	0.973714	0.835968	0.87193
IMo	0.794524	0.101429	0.722241	0.804667	0.99	0.599556	0.450244	0.893226	0.67913	0.55025	0.5112	0.916129	0.835968	0.781
IMo CD192+	0.5112	0.71	0.250588	0.486857	0.792833	0.599556	0.493913	0.2485	0.645455	0.871364	0.0294143	0.807931	0.166696	0.606098
IMo CX3CR1+	0.825918	0.782203	0.549245	0.640392	0.62431	0.512778	0.917538	0.306591	0.370435	0.801613	0.345405	0.374722	0.332813	0.873846
B	0.639	0.101429	0.1775	0.304286	0.0102063	0.224833	0.26625	0.315556	0.370435	0.174273	0.593818	0.120391	0.1775	0.0560526
NK-like T	0.961231	0.459412	0.273077	0.24681	0.144088	0.845238	0.917538	0.893226	0.953429	0.1562	0.426	0.15904	0.931875	0.365758
T LAG3+	0.270688	0.325417	0.119813	0.0413091	0.06816	0.489655	0.110937	0.012425	0.571944	0.301212	0.104412	0.0219455	0.0167818	7.24e-05
NK CD56bright	0.639	0.98	0.417647	0.493056	0.524783	0.682692	0.110937	0.912857	0.898594	0.365143	0.589434	0.251935	0.648261	0.852
NK CD56dim	0.0516364	0.804667	0.171583	0.552222	0.179472	0.746102	0.5822	0.494848	0.370435	0.0071	0.426	0.950147	0.433889	0.873846
NK	0.1065	0.504474	0.164421	0.507143	0.0862143	0.746102	0.484091	0.588286	0.370435	0.00355	0.426	0.863833	0.540952	0.98
T CD4+CD127hiCD25+	0.750571	0.18815	0.417647	0.44375	0.0473333	0.339565	0.271471	0.315556	0.244556	0.301212	0.218259	0.668235	0.15975	0.355
Treg	0.930345	0.6532	0.1704	0.804667	0.100774	0.884928	0.15975	0.821373	0.678444	0.185217	0.26625	0.457556	1	0.61093
T CD4+25+	0.928462	0.98	0.417647	0.528372	0.38881	0.933143	0.26625	0.821373	0.872951	0.639	0.593818	0.5964	0.912857	0.645455
T CD4+LAG3+	0.930345	0.355	0.186069	0.507143	0.211081	0.94	0.26625	0.329643	0.914394	0.734483	0.426	0.457556	0.191154	0.0433889
T CD4+TIM3+	0.217733	0.762593	0.215152	0.640392	0.535849	0.224833	0.576875	0.0600769	0.370435	0.23856	0.00144367	0.334118	0.15975	0.441351
T CD8+CD25+	0.767568	0.649574	0.591667	0.845735	0.99	0.510312	0.584706	0.315556	0.575676	0.71	0.946667	0.26625	0.666531	0.846538
T CD8+LAG3	0.120154	0.682157	0.119813	0.0912857	0.380976	0.503871	0.17581	0.004544	0.370435	0.696852	0.271471	0.0219455	0.0497	0.071
T CD8+PD1+LAG3+	0.849216	0.128688	0.119813	0.110937	0.0484091	0.3408	0.110937	0.0994	0.645455	0.604255	0.335278	0.0754375	0.101429	0.0118333
T CD8+TIM3+	0.411053	0.648261	0.866618	0.797193	0.520667	0.339565	0.373684	0.367241	0.370435	0.604255	0.158905	0.956957	0.736296	0.873846
NK TIM3+	0.985522	0.05112	0.119813	0.121118	0.002982	0.512778	0.324571	0.820444	0.695208	0.0142	0.860606	0.202481	0.191154	0.0946667
T CD8+CD28-	0.794524	0.458065	0.178815	0.24681	0.00912857	0.473333	0.489111	0.85463	0.872951	0.02627	0.660175	0.1065	0.668235	0.441351
T CD8+CD28-PD1+	0.825918	0.58878	0.1775	0.304286	0.0071	0.339565	0.5822	0.655385	0.872951	0.0420083	0.843125	0.0659286	0.665625	0.71
T CD4+PD1+TIM3+LAG3+	0.930345	0.782203	0.119813	0.304286	0.0265316	0.481786	0.110937	0.0608571	0.645455	0.138056	0.1562	0.0971579	0.15975	0.02414
T CD8+PD1+TIM3+LAG3+	0.930345	0.58575	0.121118	0.459412	0.0236667	0.224833	0.110937	0.12425	0.616579	0.138056	0.194478	0.071	0.375882	0.320645
TEM	0.750571	0.101429	0.171583	0.193278	0.0071	0.814754	0.26625	0.890727	0.8236	0.0236667	0.373684	0.119409	0.987826	0.441351
TN/TSCM	0.99	0.101429	0.38587	0.507143	0.0071	0.224833	0.216227	0.893226	0.929265	0.301212	0.426	0.392368	0.597045	0.21037
TEMRA	0.825918	0.459412	0.119813	0.304286	0.0680417	0.599556	0.118333	1	0.370435	0.0393727	0.97	0.242379	0.987826	0.58575
TN	0.961231	0.101429	0.215152	0.304286	0.0236667	0.582564	0.04615	0.85463	0.872951	0.301212	0.382308	0.400513	0.504474	0.0363875
TEM PD1+	0.8378	0.236667	0.273077	0.504474	0.146057	0.512778	0.04615	0.653947	0.872951	0.580909	0.26625	0.925152	0.199852	0.0568
T PD1+	0.5112	0.1775	0.782203	0.95	0.516364	0.582564	0.60283	0.402333	0.872951	0.756557	0.26625	0.920781	0.166696	0.417647
T CD4+CD8+PD1+	0.750571	0.782203	0.943286	0.507143	0.890317	0.114692	0.659286	0.315556	0.637179	0.820937	0.426	0.797193	0.527949	0.73898
TEM CD4+CD8+	0.639	0.736792	0.804667	0.95	0.535849	0.339565	0.917538	0.290762	0.872951	0.697091	0.0912857	0.773393	0.274839	0.87193
TN/SCM CD8+	0.950678	0.0757333	0.38587	0.571087	0.04615	0.599556	0.26625	0.983077	0.782449	0.365143	0.661034	0.670556	0.835968	0.1775
TEMRA CD8+PD1+	0.767568	0.646889	0.417647	0.640392	0.0930345	0.682692	0.110937	0.931875	0.370435	0.301212	0.860606	0.202481	0.939385	0.98
TCM CD8+	0.451818	0.98	0.371905	0.804667	0.914394	0.071	0.04615	0.465938	0.420741	0.262154	0.438085	0.5964	0.646889	0.852
TEMRA CD8+	0.750571	0.591667	0.215152	0.412258	0.0524783	0.858358	0.110937	0.998116	0.571944	0.1562	0.897941	0.251935	0.978939	0.852
TN/SCM CD8+PD1+	0.957937	0.05112	0.171583	0.669038	0.071	0.683208	0.110937	0.998116	0.571944	0.301212	0.5112	0.98	0.759825	0.26931
T CD8+PD1+	0.825918	0.98	0.38587	0.841077	0.890317	0.858358	0.436923	0.893226	0.872951	0.668235	0.843125	0.439524	0.365758	0.98
Mo	0.825918	0.98	0.379767	0.845735	0.535849	0.858358	0.917538	0.893226	0.370435	0.71	0.432174	0.773393	0.736296	0.846538
M-MDSC	0.351056	0.961935	0.518846	0.845735	0.898594	0.682692	0.110937	0.85463	0.645455	0.580909	0.271471	0.483404	0.835968	0.873846
Mo PDL1+	0.217733	0.782203	0.273077	0.402333	0.462326	0.3408	0.659286	0.157778	0.5325	0.99	0.199346	0.0659286	0.274839	0.0833478
PMN-MDSC	0.794524	0.646889	0.97	0.696604	0.914394	0.746102	0.98	0.998116	0.456429	0.756557	0.26625	0.920781	0.504474	0.73898
PMN-MDSC LOX1+	0.351056	0.849672	0.371905	0.5325	0.99	0.746102	0.110937	0.893226	0.914394	0.820937	0.0912857	0.916129	0.665625	0.903636
DC	0.604815	0.473333	0.659286	0.797193	0.872951	0.355	0.142	0.157778	0.571944	0.669038	0.722034	0.202857	0.385429	0.98
DC CD16+	0.930345	0.271091	0.119813	0.788889	0.144088	0.858358	0.116941	0.820444	1	0.453611	0.781	0.925152	0.759825	0.473333
IMo CD192loCX3CR1dim	0.794524	0.459412	0.813065	0.504474	0.985522	0.575676	0.110937	0.777619	0.872951	0.683208	0.0912857	0.670556	0.5325	0.873846
NK-like T CD16-	0.546154	0.509744	0.119813	0.304286	0.0071	0.697091	0.271471	0.998116	0.473333	0.0150875	0.801613	0.279697	0.987826	0.448421
TEM CD8+PD1+	0.5112	0.101429	0.417647	0.95	0.622807	0.877059	0.644259	0.821373	0.384583	0.99	0.502917	0.463043	0.536829	0.15052
TCM CD8+PD1+	0.978939	0.98	0.33725	0.459412	0.56537	0.599556	0.05538	0.821373	0.420741	0.138056	0.791475	0.432927	0.668235	0.608571
Mo VISTA+	0.957937	0.449667	0.263714	0.640392	0.595893	0.497	0.960588	0.821373	0.872951	0.604255	0.595893	0.392368	1	0.873846

## Sheet: S16
	aDC	pDC	Eosinophils	Macrophages	Mast.cells	Monocytes	Neutrophils	NKT	CD4..Tcm	CD4..Tem	CD8..T.cells	CD8..Tcm	CD8..Tem	Th1.cells
Mo CX3CR1+	0.3	0.91	0.71	0.64	0.4	0.42	0.075	0.35	0.19	0.62	0.033	0.51	0.022	0.44
Mo CD192+	0.00023	0.44	0.77	0.0055	0.37	0.0014	0.92	0.00057	0.0047	0.9	0.00014	0.0068	0.0002	0.0022
Mo CD192+DR-	0.82	0.94	0.79	0.73	0.96	0.49	0.81	0.43	0.099	0.81	0.061	0.38	0.73	0.51
Mo CX3CR1+DR-	0.95	0.052	0.14	0.74	0.17	0.1	0.91	1	0.67	0.31	0.84	0.9	0.37	0.86
Mo VISTA+DR+	0.13	0.095	0.016	0.16	0.034	0.39	0.82	0.24	0.45	0.027	0.024	0.019	0.099	0.084
T CX3CR1+	0.97	0.14	0.076	0.77	0.36	0.64	0.55	0.58	0.77	0.43	0.43	0.25	0.51	0.79
CMo CX3CR1+	0.52	0.65	0.59	0.46	0.38	0.41	0.12	0.74	0.89	0.29	0.12	0.73	0.089	0.79
CMo DR+	0.7	0.94	0.85	0.76	0.61	0.52	0.19	0.52	0.15	0.35	0.17	0.96	0.73	0.7
IMo	0.44	0.012	0.59	0.66	0.99	0.38	0.26	0.75	0.44	0.3	0.36	0.8	0.72	0.55
IMo CD192+	0.18	0.52	0.12	0.24	0.67	0.38	0.32	0.07	0.39	0.81	0.0029	0.66	0.05	0.35
IMo CX3CR1+	0.53	0.64	0.41	0.46	0.51	0.25	0.83	0.095	0.11	0.7	0.18	0.19	0.15	0.75
B	0.27	0.02	0.065	0.11	0.0023	0.056	0.12	0.12	0.071	0.054	0.46	0.039	0.06	0.015
NK-like T	0.87	0.22	0.15	0.073	0.069	0.74	0.78	0.78	0.94	0.044	0.27	0.055	0.84	0.17
T LAG3+	0.061	0.11	0.018	0.0064	0.024	0.2	0.025	0.0021	0.29	0.12	0.025	0.0032	0.0026	5.1e-06
NK CD56bright	0.27	0.95	0.3	0.25	0.34	0.48	0.016	0.81	0.81	0.18	0.44	0.11	0.42	0.66
NK CD56dim	0.008	0.68	0.057	0.35	0.091	0.62	0.41	0.23	0.073	0.0005	0.25	0.91	0.22	0.75
NK	0.018	0.27	0.044	0.29	0.033	0.59	0.3	0.29	0.099	0.0002	0.27	0.73	0.32	0.96
T CD4+CD127hiCD25+	0.36	0.053	0.3	0.2	0.014	0.1	0.13	0.11	0.031	0.14	0.083	0.48	0.041	0.16
Treg	0.74	0.46	0.048	0.68	0.044	0.86	0.045	0.59	0.43	0.06	0.12	0.29	1	0.37
T CD4+25+	0.68	0.87	0.28	0.32	0.23	0.92	0.11	0.57	0.73	0.45	0.46	0.42	0.81	0.4
T CD4+LAG3+	0.76	0.14	0.074	0.3	0.11	0.94	0.093	0.13	0.85	0.6	0.26	0.29	0.069	0.011
T CD4+TIM3+	0.046	0.58	0.095	0.46	0.4	0.053	0.39	0.011	0.091	0.084	6.1e-05	0.16	0.037	0.23
T CD8+CD25+	0.39	0.43	0.45	0.81	0.98	0.23	0.42	0.12	0.3	0.57	0.92	0.12	0.46	0.62
T CD8+LAG3	0.022	0.49	0.024	0.017	0.22	0.22	0.052	0.00064	0.12	0.53	0.13	0.0034	0.0091	0.021
T CD8+PD1+LAG3+	0.61	0.029	0.026	0.025	0.015	0.12	0.024	0.021	0.38	0.39	0.17	0.017	0.02	0.002
T CD8+TIM3+	0.11	0.42	0.83	0.62	0.33	0.11	0.2	0.15	0.09	0.4	0.047	0.93	0.55	0.79
NK TIM3+	0.93	0.0036	0.019	0.029	0.00021	0.26	0.16	0.51	0.47	0.0014	0.8	0.077	0.07	0.032
T CD8+CD28-	0.47	0.2	0.068	0.072	0.0018	0.18	0.31	0.64	0.74	0.0037	0.53	0.03	0.48	0.23
T CD8+CD28-PD1+	0.57	0.34	0.063	0.12	0.0012	0.11	0.41	0.36	0.71	0.0071	0.75	0.013	0.45	0.46
T CD4+PD1+TIM3+LAG3+	0.76	0.62	0.021	0.1	0.0071	0.19	0.016	0.012	0.4	0.035	0.043	0.026	0.045	0.0051
T CD8+PD1+TIM3+LAG3+	0.75	0.33	0.029	0.22	0.006	0.057	0.013	0.028	0.33	0.03	0.063	0.015	0.18	0.14
TEM	0.36	0.019	0.056	0.049	0.0011	0.7	0.12	0.69	0.58	0.003	0.2	0.037	0.96	0.23
TN/TSCM	0.99	0.019	0.25	0.29	0.0013	0.052	0.067	0.78	0.89	0.14	0.24	0.21	0.37	0.08
TEMRA	0.57	0.21	0.0087	0.12	0.023	0.38	0.03	0.99	0.1	0.0061	0.97	0.099	0.95	0.33
TN	0.88	0.015	0.1	0.11	0.006	0.32	0.0014	0.63	0.64	0.14	0.21	0.22	0.27	0.0082
TEM PD1+	0.59	0.07	0.15	0.27	0.072	0.24	0.002	0.35	0.75	0.35	0.12	0.85	0.076	0.016
T PD1+	0.18	0.044	0.65	0.93	0.32	0.32	0.45	0.17	0.63	0.65	0.12	0.82	0.052	0.2
T CD4+CD8+PD1+	0.37	0.64	0.93	0.3	0.79	0.021	0.52	0.12	0.35	0.74	0.27	0.64	0.29	0.5
TEM CD4+CD8+	0.26	0.55	0.68	0.95	0.37	0.11	0.82	0.086	0.73	0.54	0.017	0.61	0.12	0.7
TN/SCM CD8+	0.79	0.0064	0.25	0.37	0.013	0.35	0.11	0.9	0.54	0.18	0.54	0.51	0.72	0.065
TEMRA CD8+PD1+	0.4	0.41	0.3	0.45	0.038	0.5	0.021	0.84	0.11	0.13	0.8	0.077	0.86	0.98
TCM CD8+	0.14	0.98	0.22	0.68	0.85	0.012	0.0026	0.21	0.16	0.096	0.29	0.42	0.41	0.66
TEMRA CD8+	0.34	0.35	0.091	0.18	0.017	0.8	0.025	0.97	0.29	0.043	0.86	0.11	0.91	0.65
TN/SCM CD8+PD1+	0.84	0.003	0.058	0.49	0.026	0.51	0.022	0.95	0.29	0.14	0.36	0.98	0.61	0.11
T CD8+PD1+	0.55	0.98	0.24	0.75	0.79	0.8	0.24	0.71	0.7	0.48	0.76	0.26	0.17	0.94
Mo	0.56	0.98	0.23	0.81	0.39	0.81	0.84	0.77	0.1	0.57	0.28	0.6	0.56	0.62
M-MDSC	0.089	0.84	0.38	0.81	0.81	0.5	0.015	0.65	0.4	0.36	0.13	0.32	0.69	0.8
Mo PDL1+	0.045	0.62	0.15	0.17	0.28	0.12	0.52	0.038	0.24	0.98	0.073	0.013	0.12	0.026
PMN-MDSC	0.45	0.4	0.97	0.52	0.85	0.61	0.97	0.95	0.18	0.65	0.12	0.83	0.27	0.51
PMN-MDSC LOX1+	0.088	0.73	0.22	0.33	0.97	0.61	0.021	0.73	0.84	0.74	0.013	0.8	0.45	0.84
DC	0.23	0.24	0.52	0.63	0.75	0.13	0.038	0.04	0.29	0.49	0.6	0.08	0.19	0.97
DC CD16+	0.72	0.084	0.026	0.6	0.068	0.81	0.028	0.52	1	0.23	0.66	0.86	0.59	0.26
IMo CD192loCX3CR1dim	0.43	0.22	0.71	0.27	0.93	0.3	0.021	0.46	0.75	0.51	0.016	0.5	0.3	0.73
NK-like T CD16-	0.2	0.28	0.017	0.12	0.001	0.54	0.13	0.97	0.2	0.0017	0.7	0.13	0.96	0.24
TEM CD8+PD1+	0.17	0.014	0.3	0.94	0.5	0.84	0.49	0.59	0.13	0.99	0.34	0.3	0.31	0.053
TCM CD8+PD1+	0.91	0.97	0.19	0.22	0.43	0.35	0.0039	0.54	0.16	0.034	0.68	0.25	0.48	0.36
Mo VISTA+	0.85	0.19	0.13	0.43	0.47	0.21	0.91	0.57	0.66	0.4	0.47	0.21	0.99	0.77
